# Supplementary material for: Chiral phosphine-phosphoramidite ligands for highly enantioselective hydrogenation of N-arylimines
Source: Royal Society of Chemistry journal article supplement (doi:10.1039/c4ra16062b), 2015-01-01

# Chiral Phosphine-phosphoramidite Ligands for Highly Enantioselective Hydrogenation of *N*-Arylimines

Qing Li<sup>a,b</sup>, Chuan-Jin Hou<sup>\*,a,b</sup>, Xiao-Ning Liu<sup>a,b</sup>, De-Zhi Huang<sup>\*,a</sup>, Yan-  
Jun Liu<sup>a</sup>, Rui-Feng Yang<sup>a</sup>, Xiang-Ping Hu<sup>\*,b</sup>

<sup>a</sup> *School of Light industry and Chemical Engineering, Dalian Polytechnic University,  
Dalian 116034, China*

<sup>b</sup> *Dalian Institute of Chemical Physics, Chinese Academy of Sciences, Dalian 116023,  
China*

## Supporting Information

**HPLC for ee analysis.....S2**

**<sup>1</sup>H NMR Spectra.....S13**

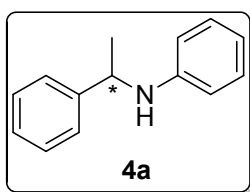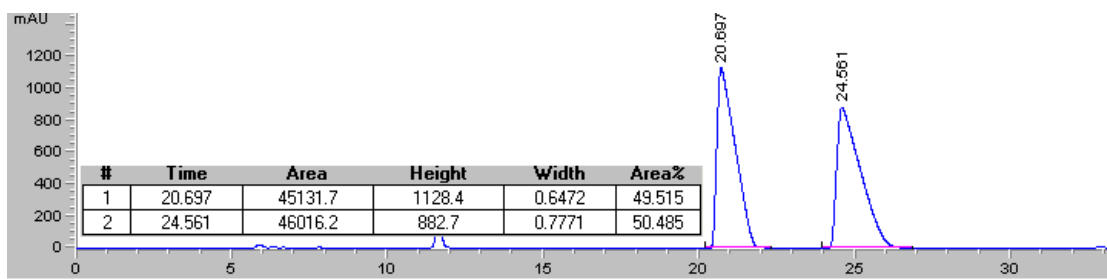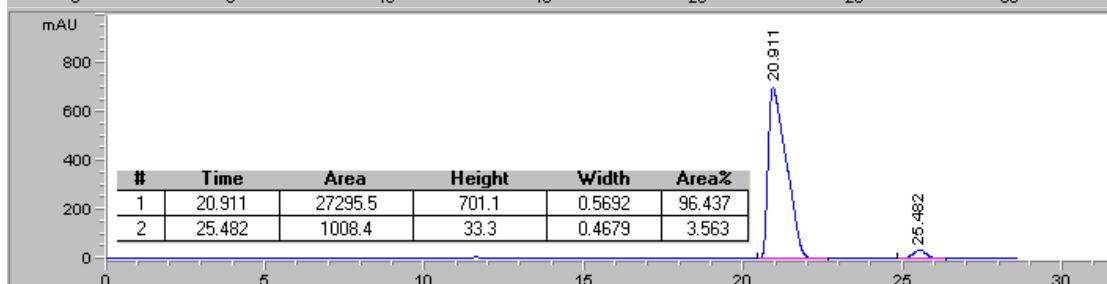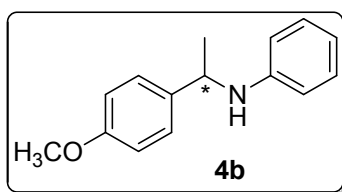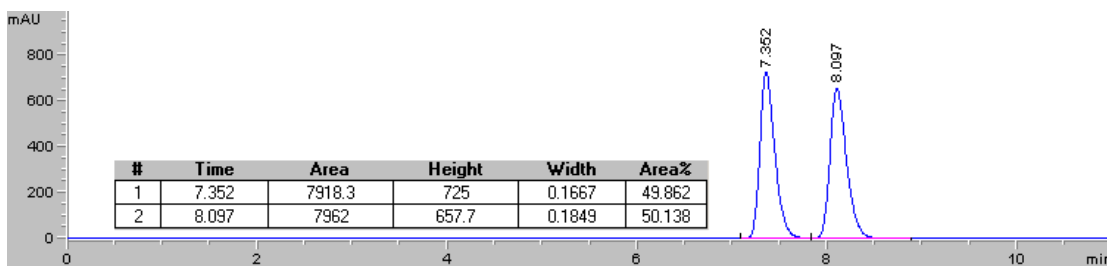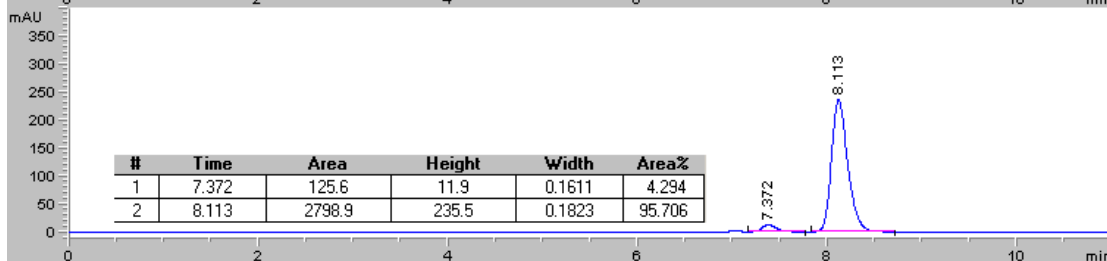

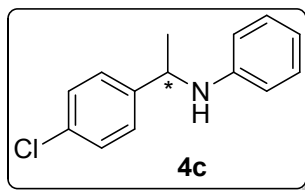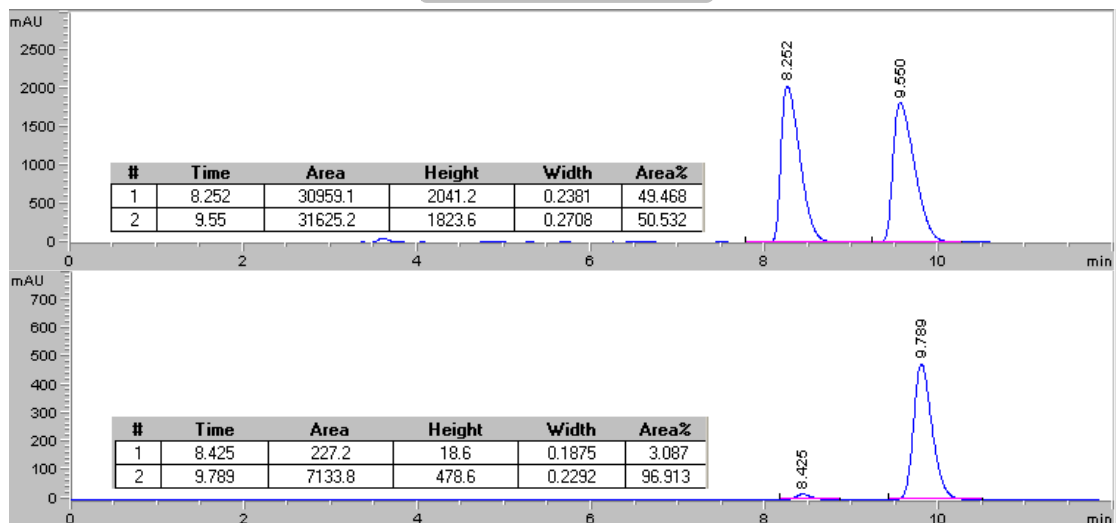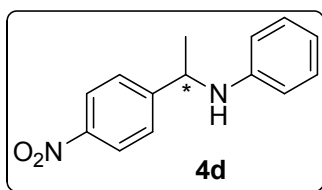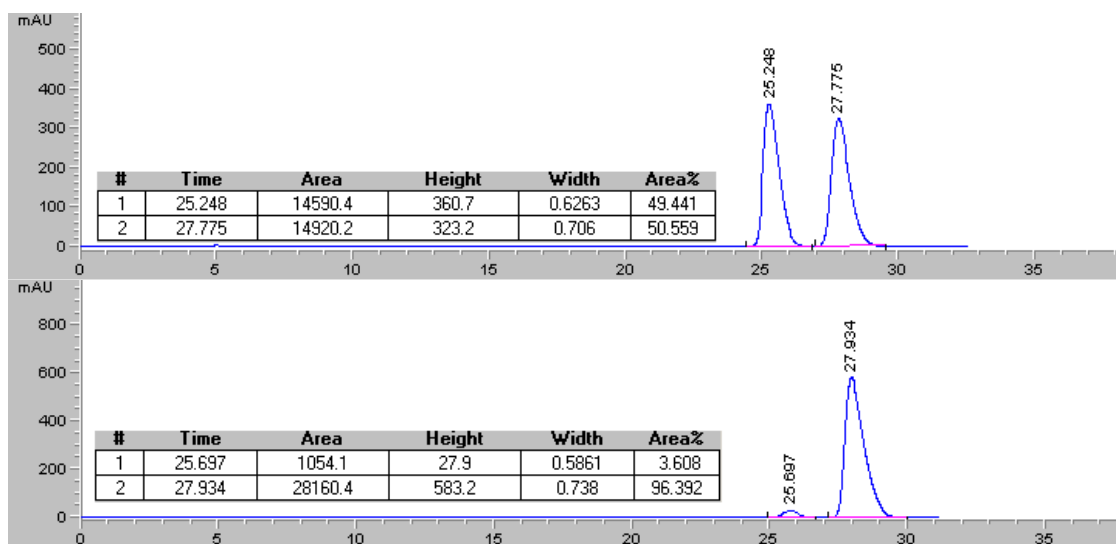

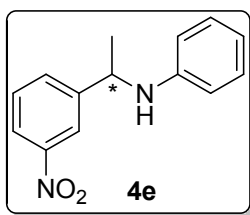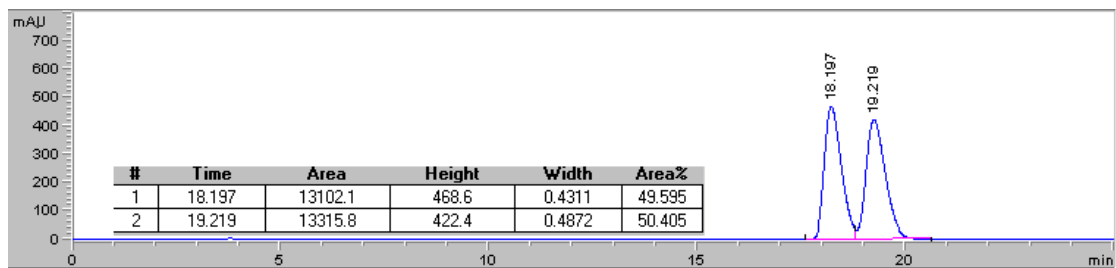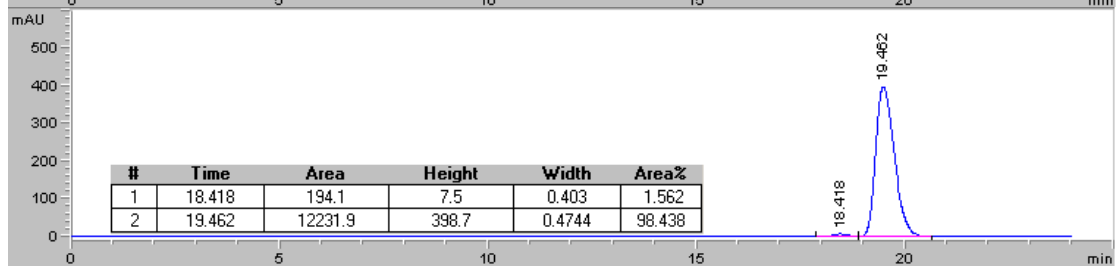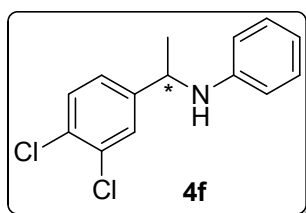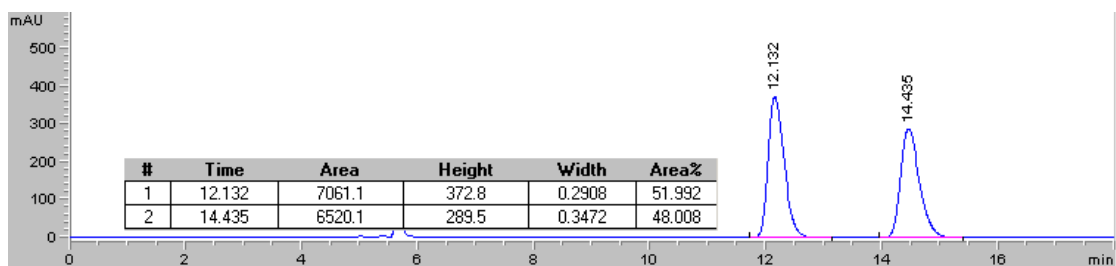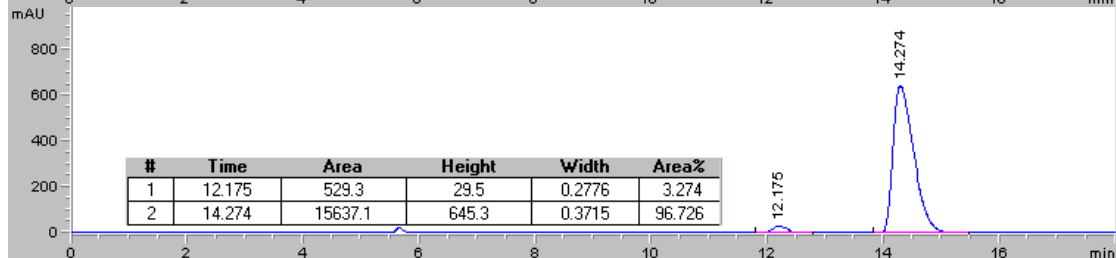

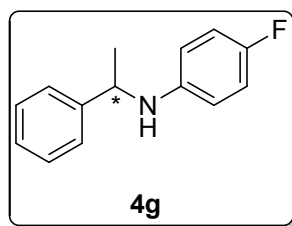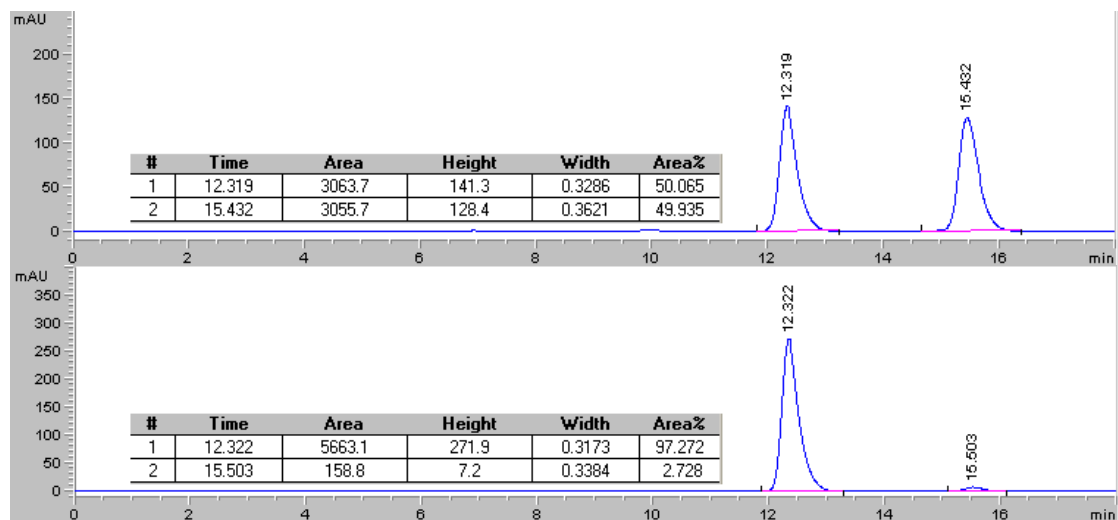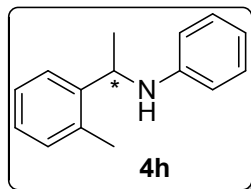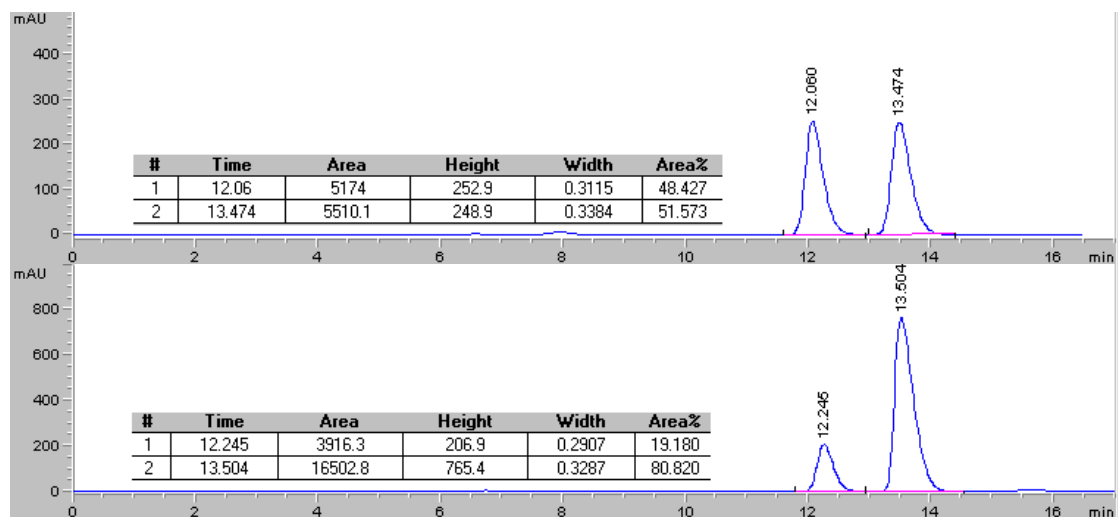

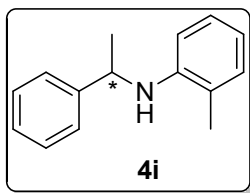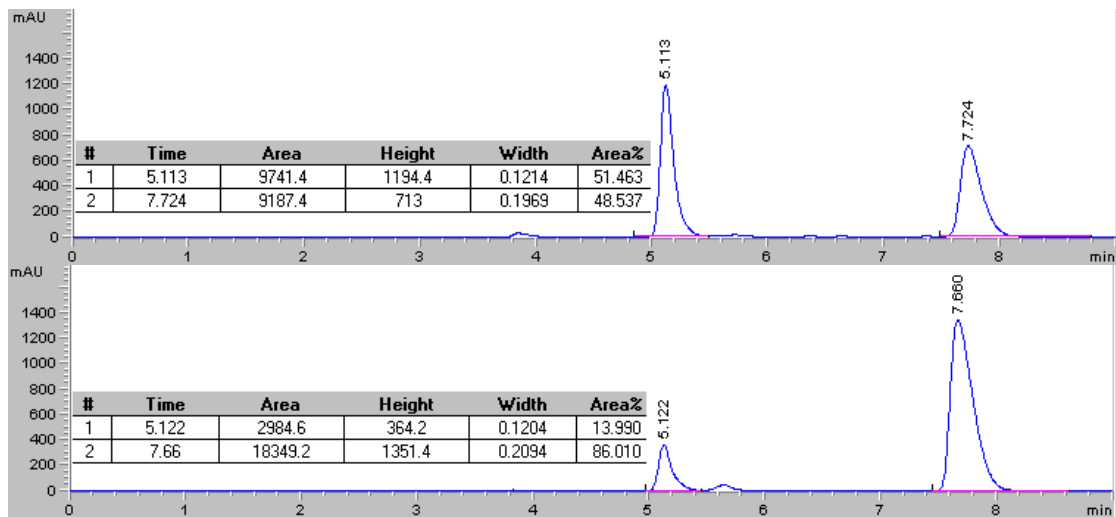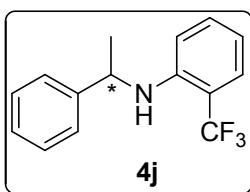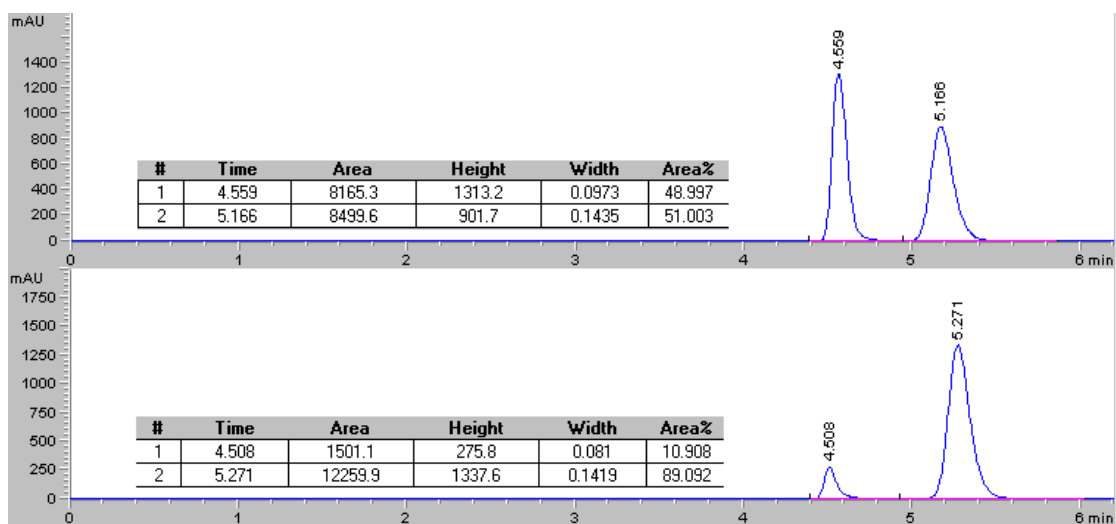

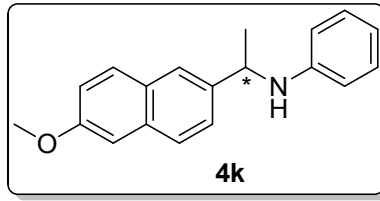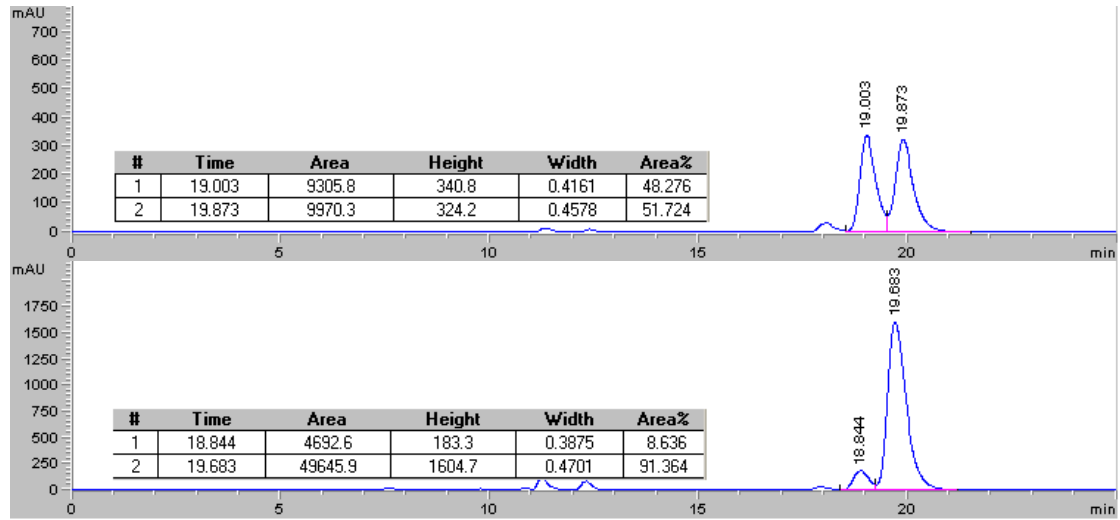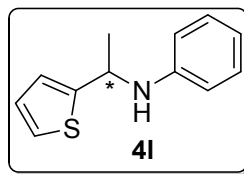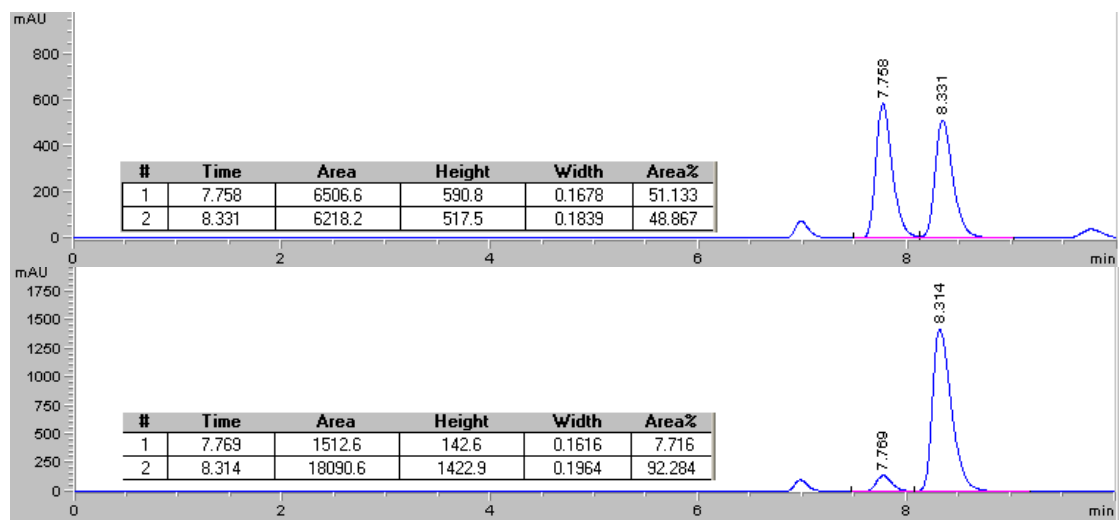

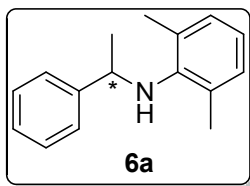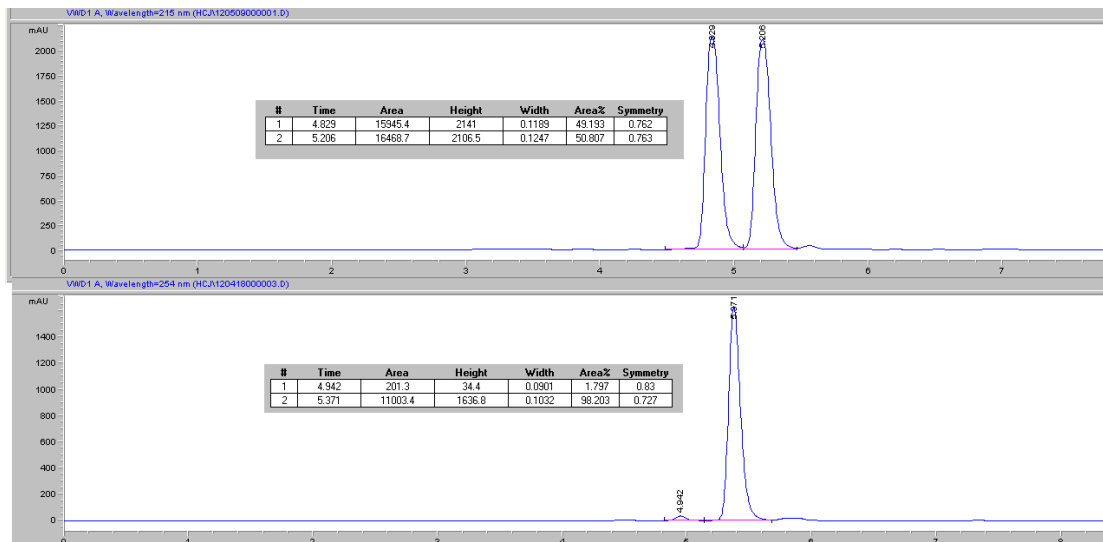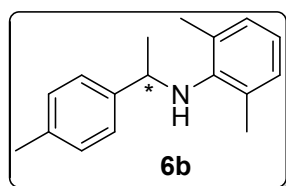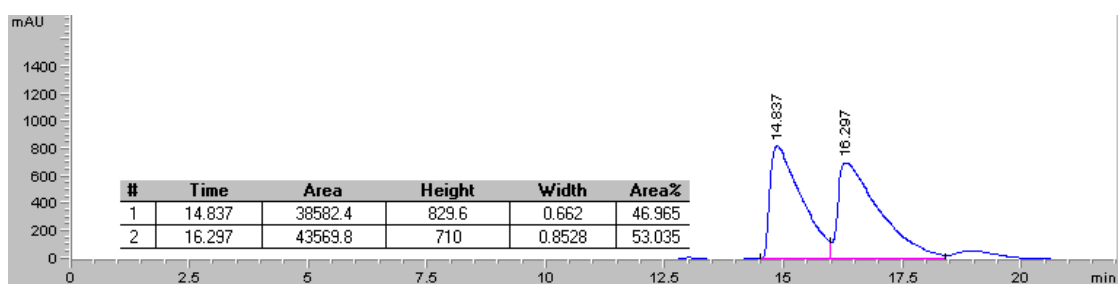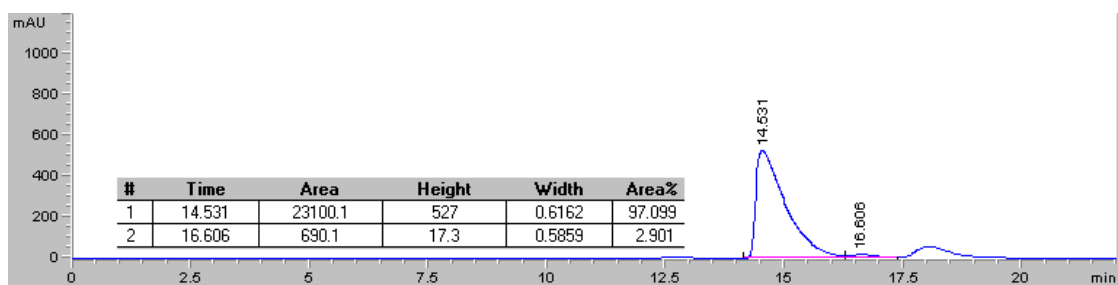



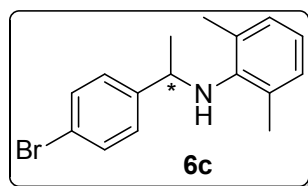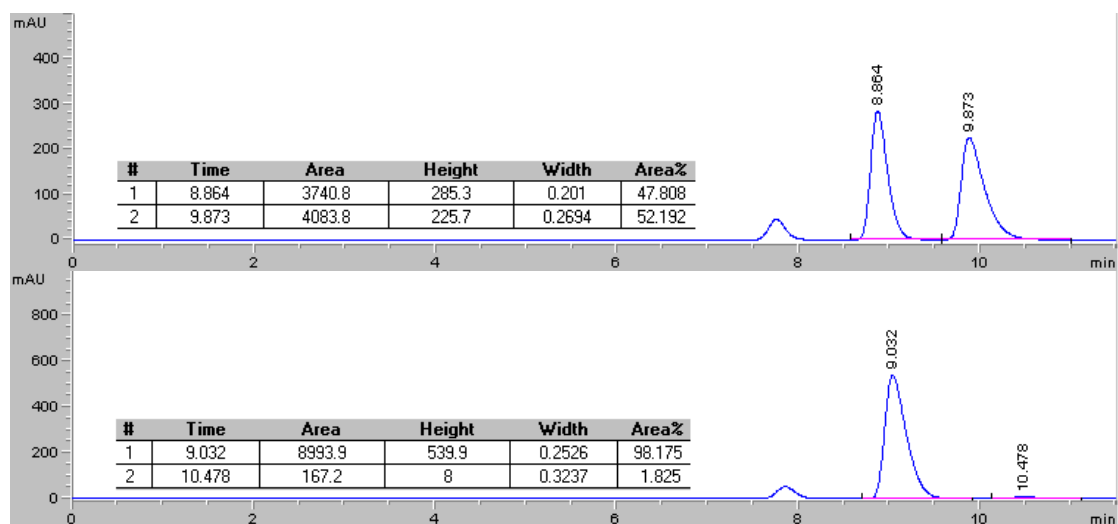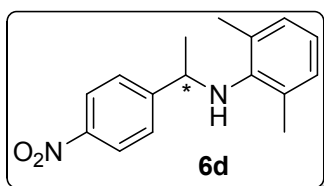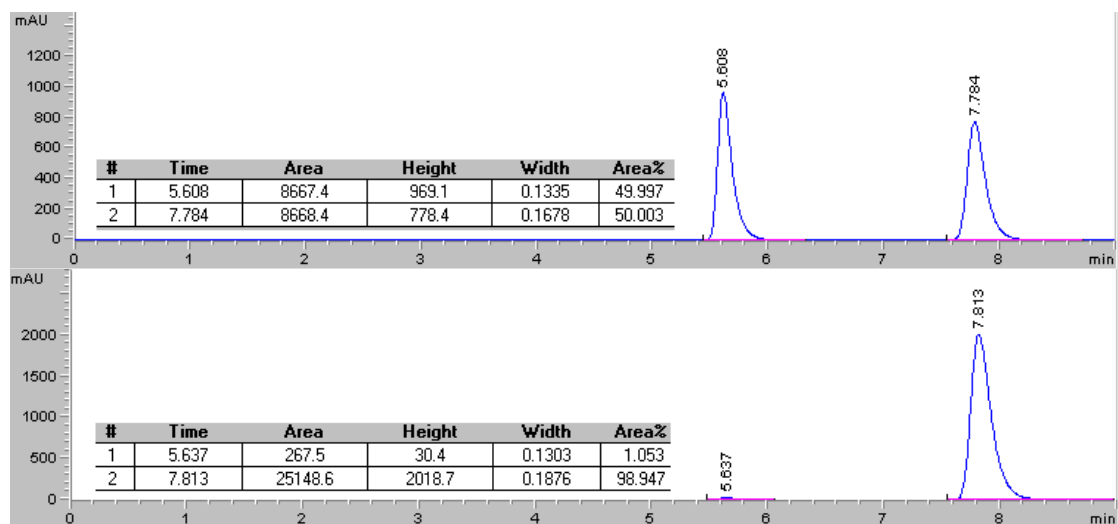

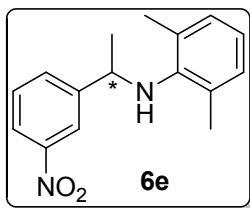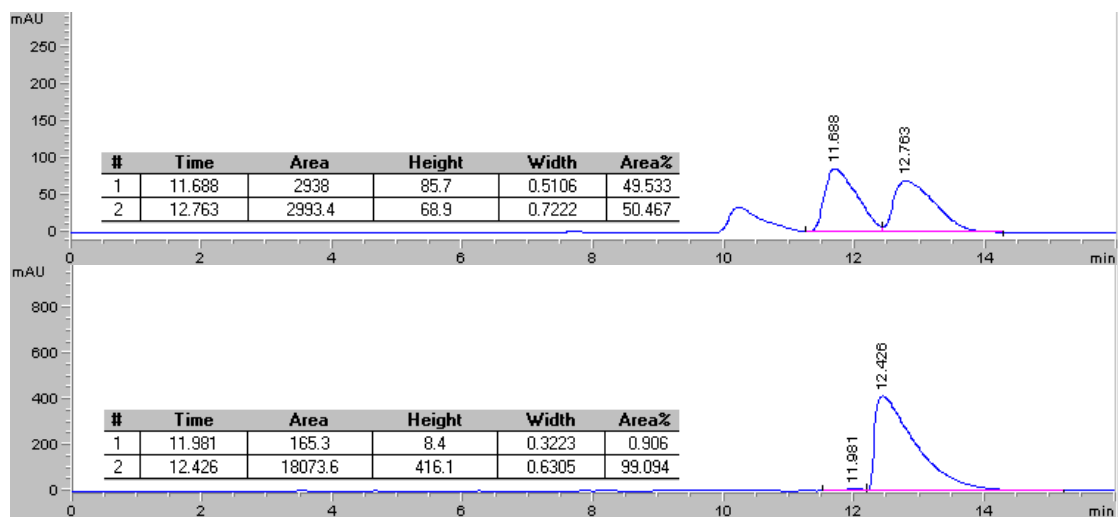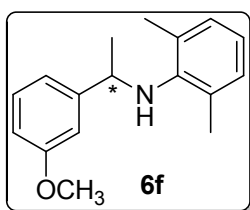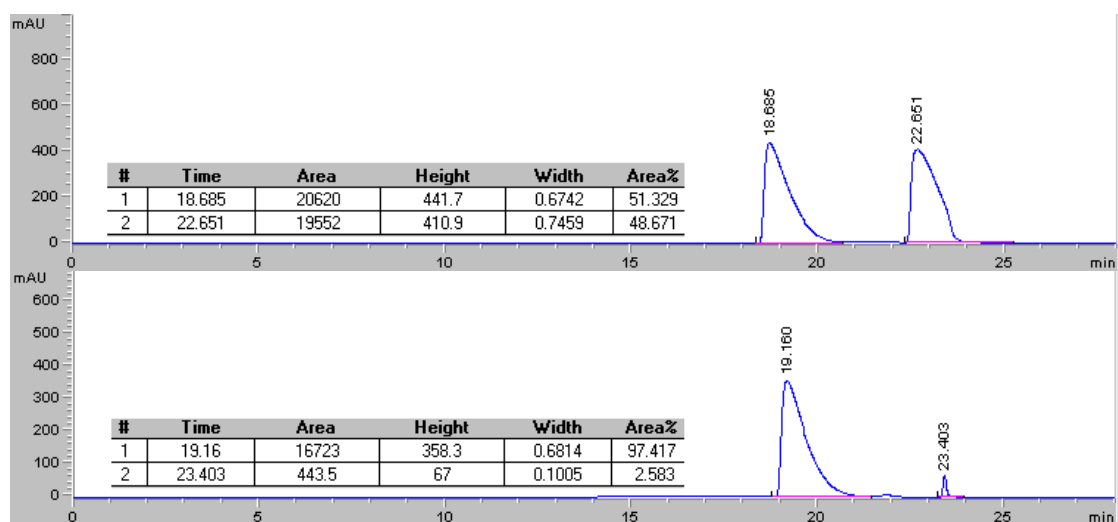

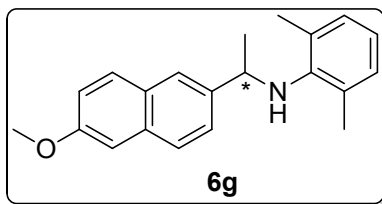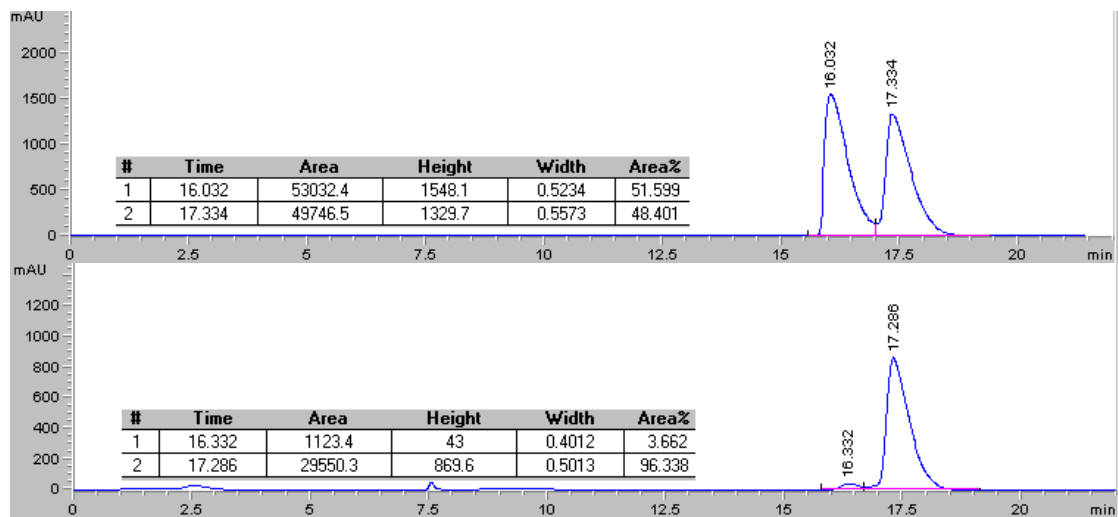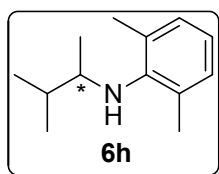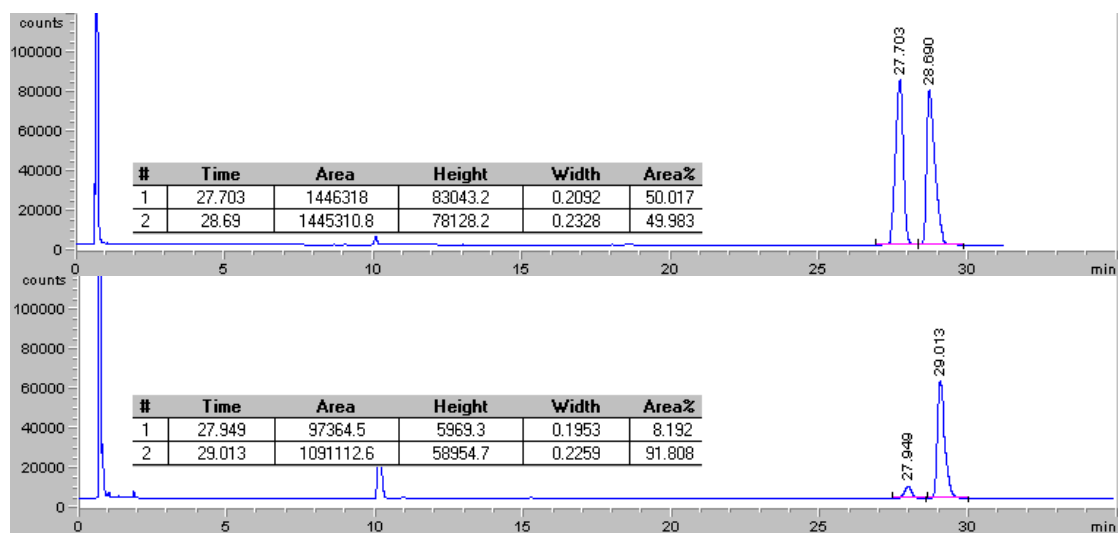

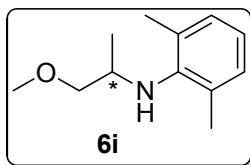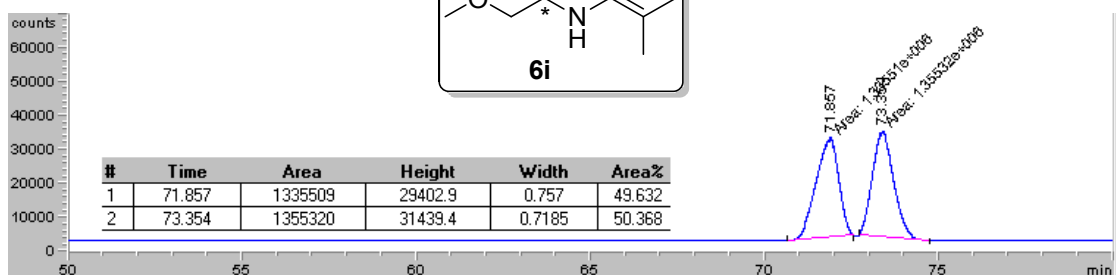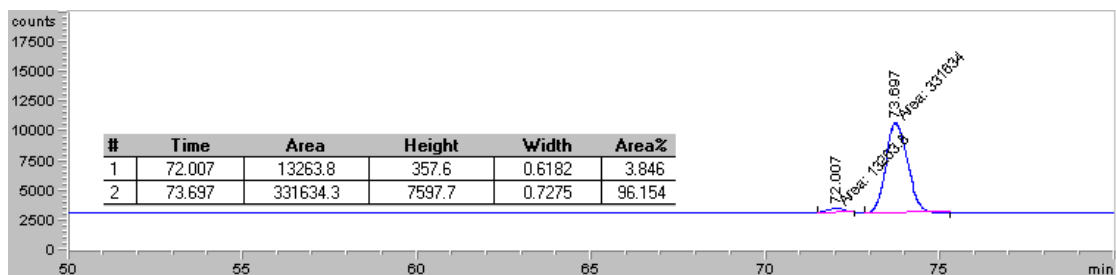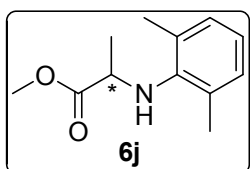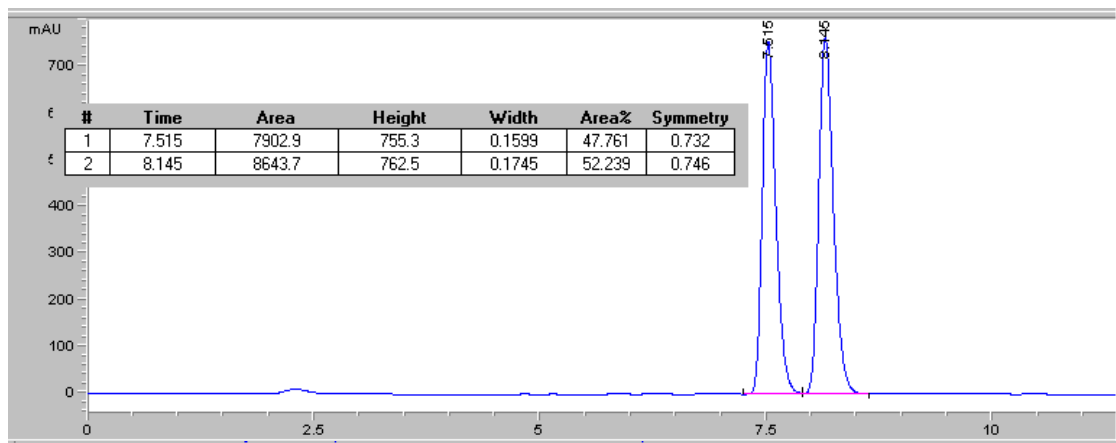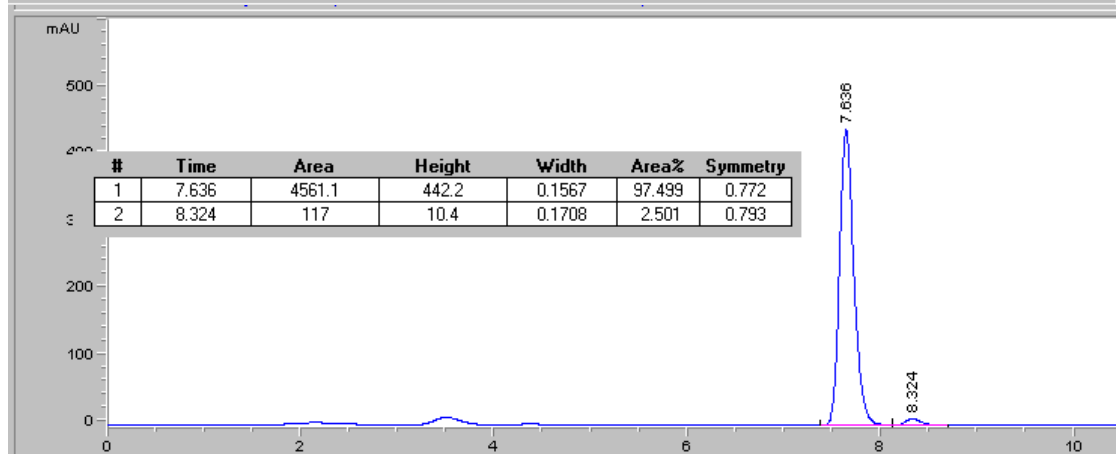

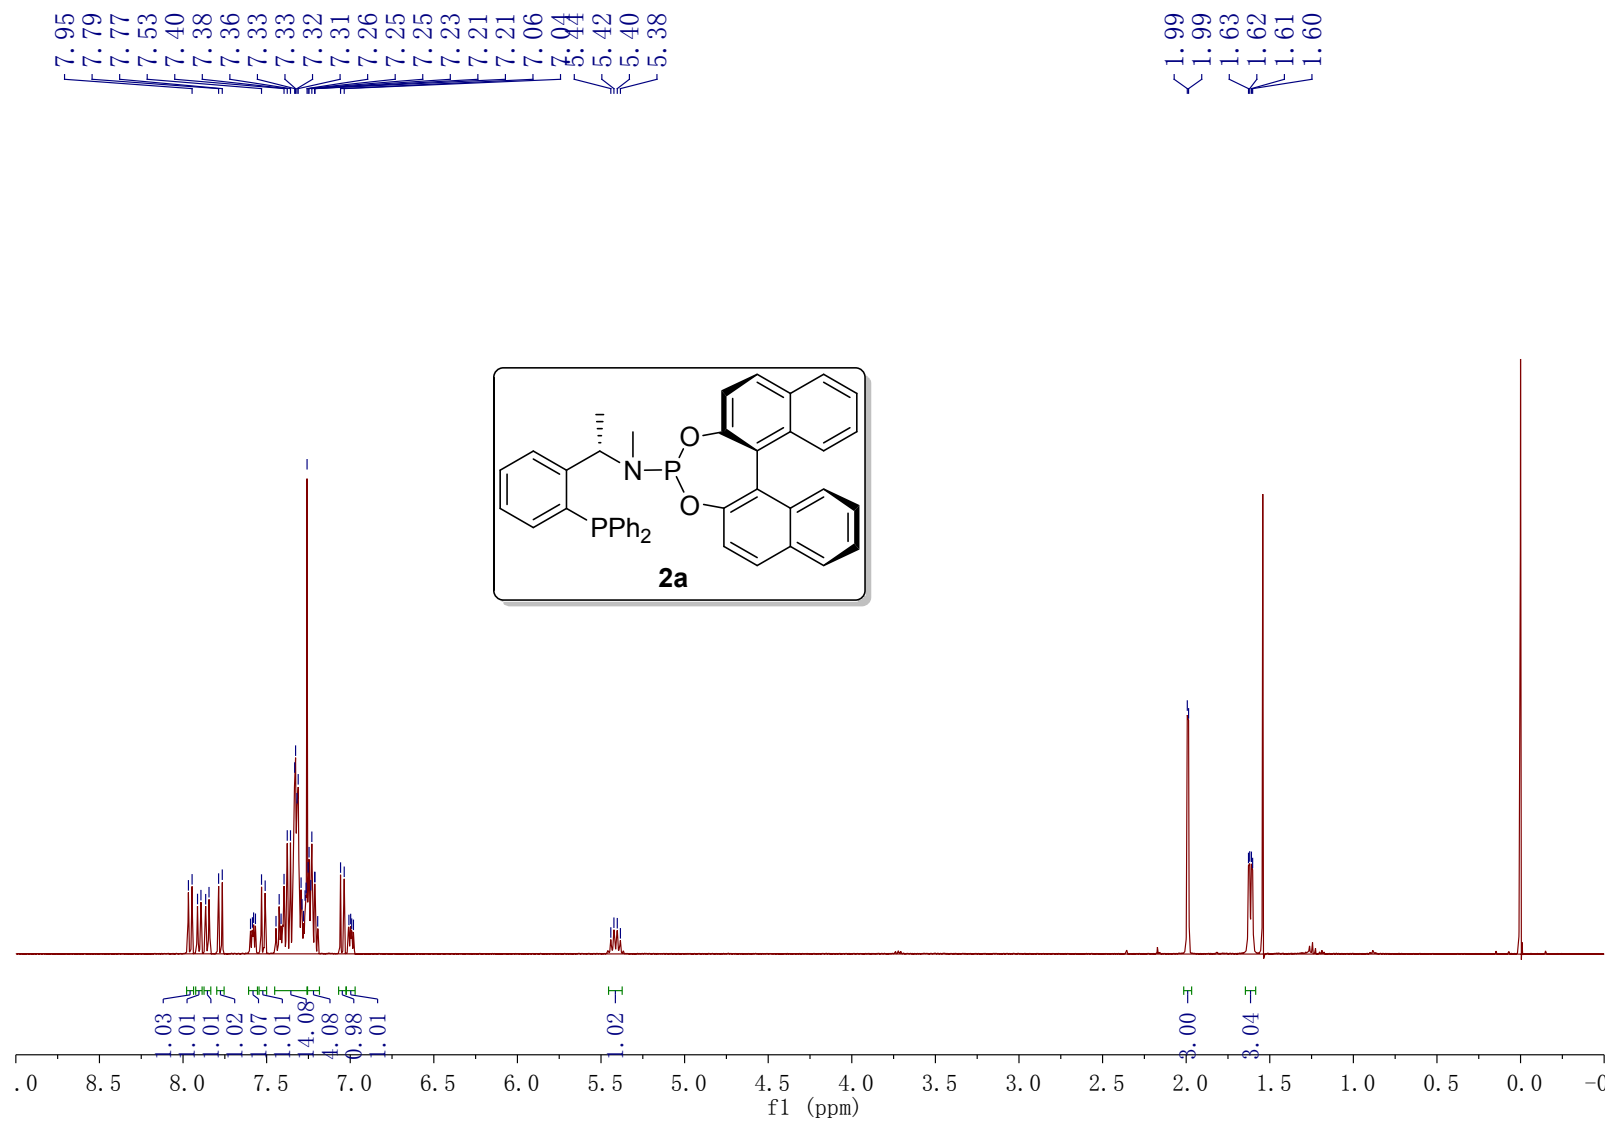

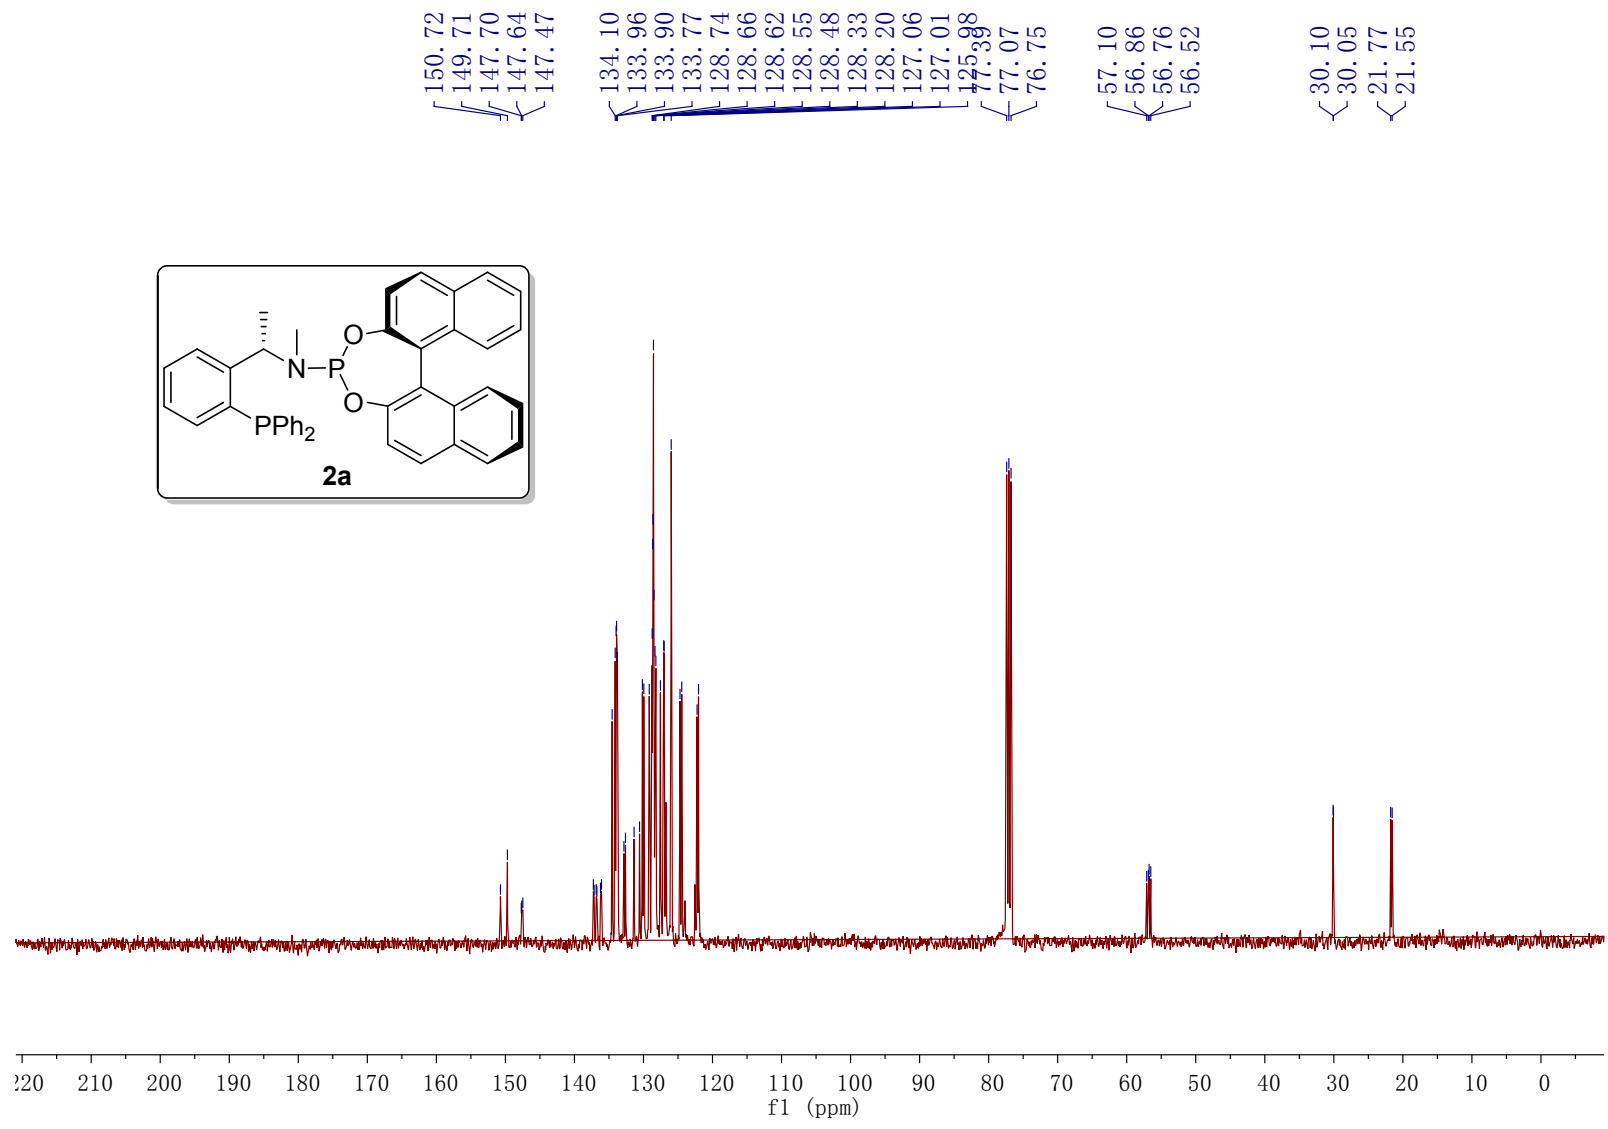

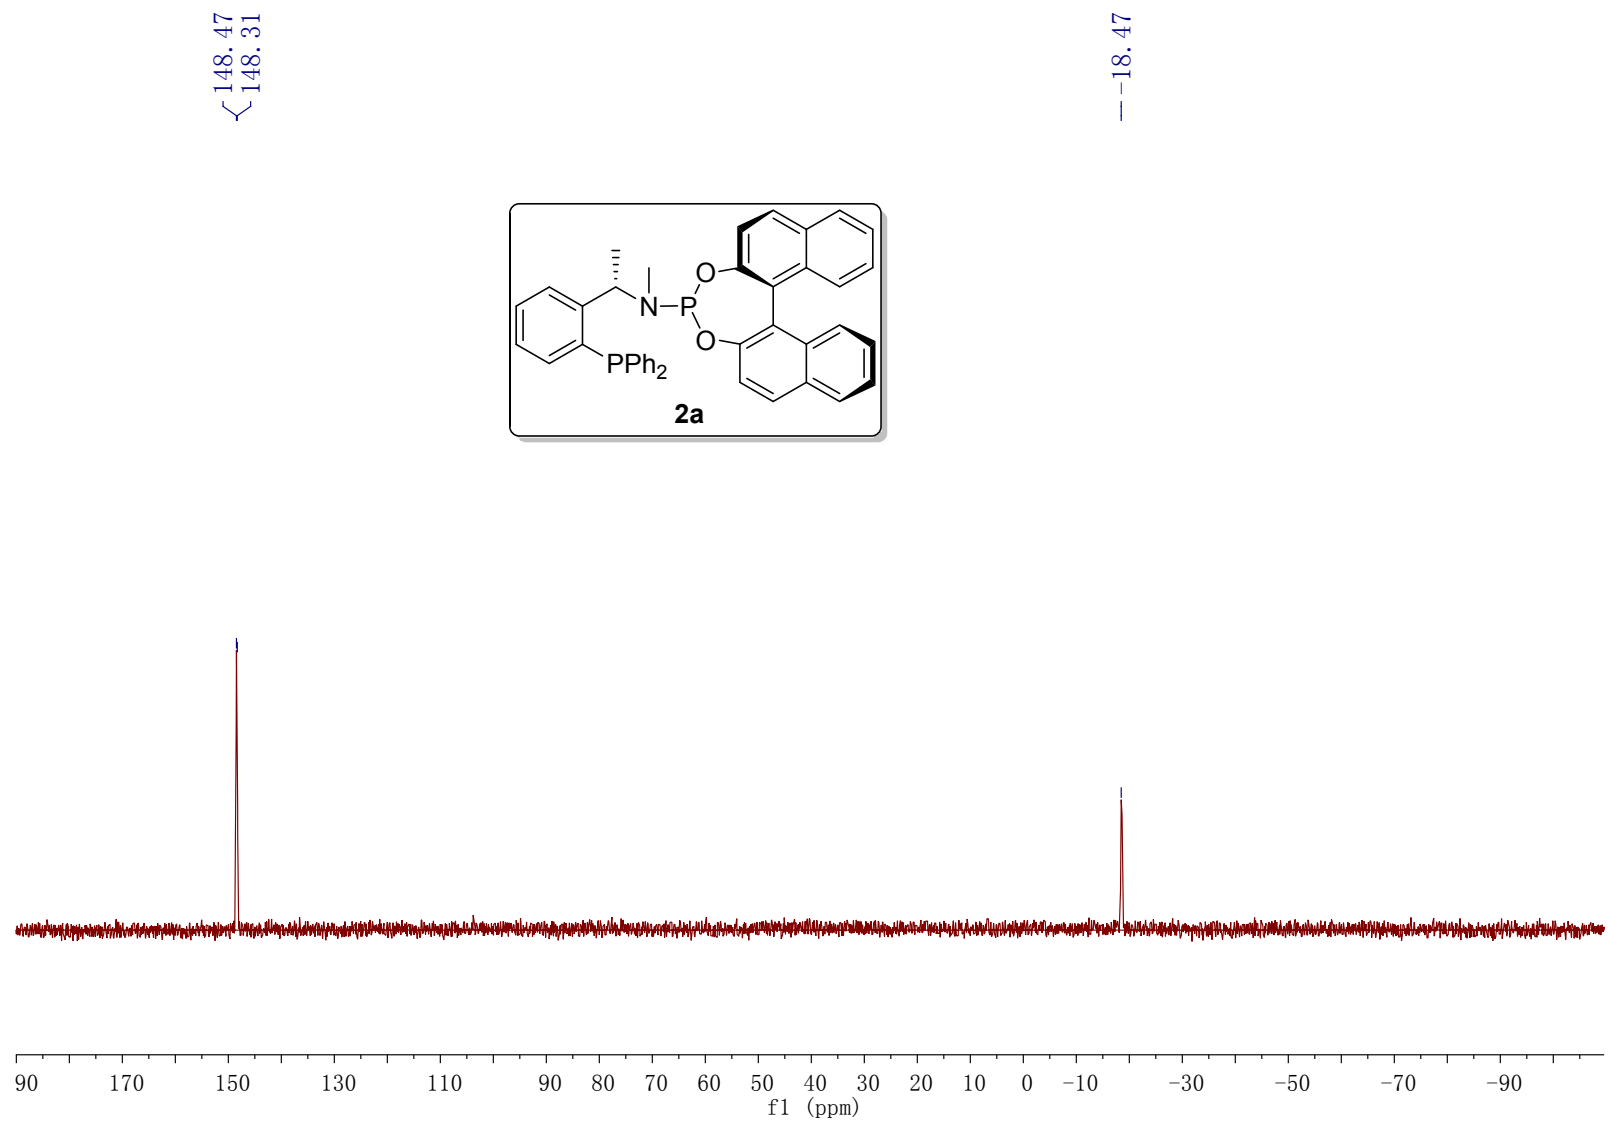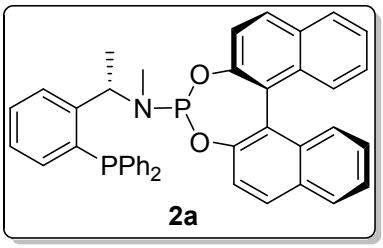

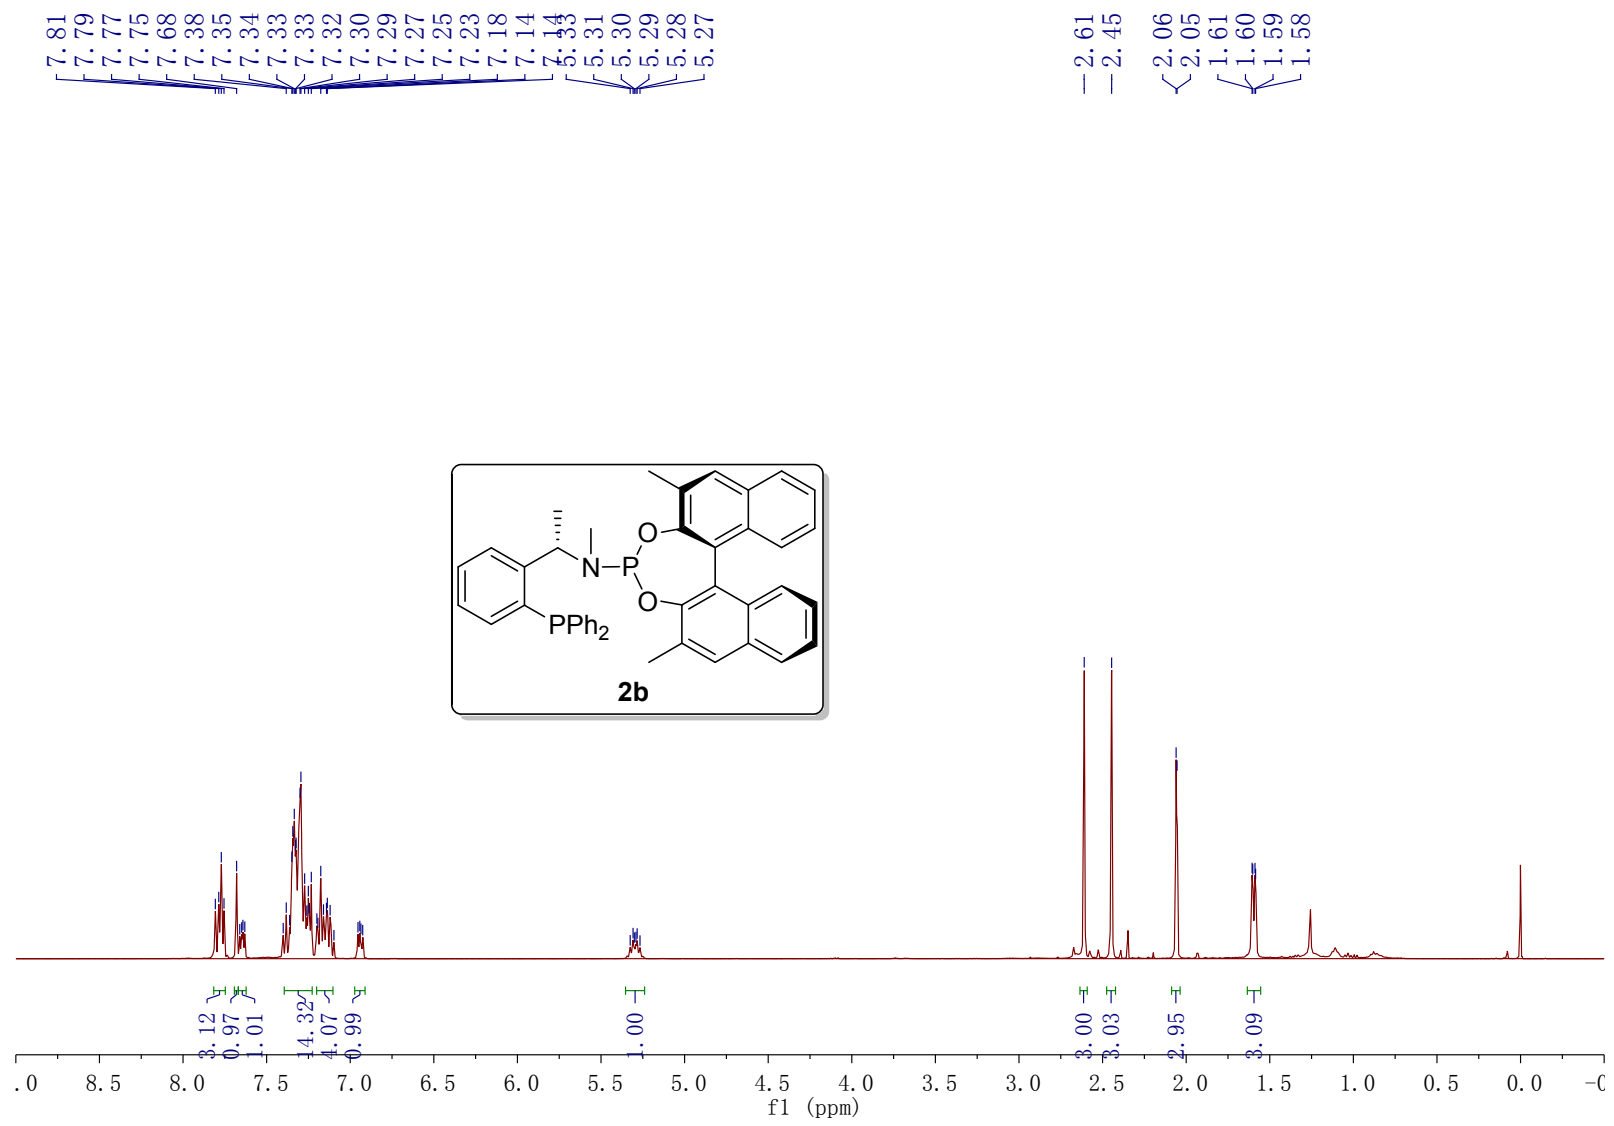



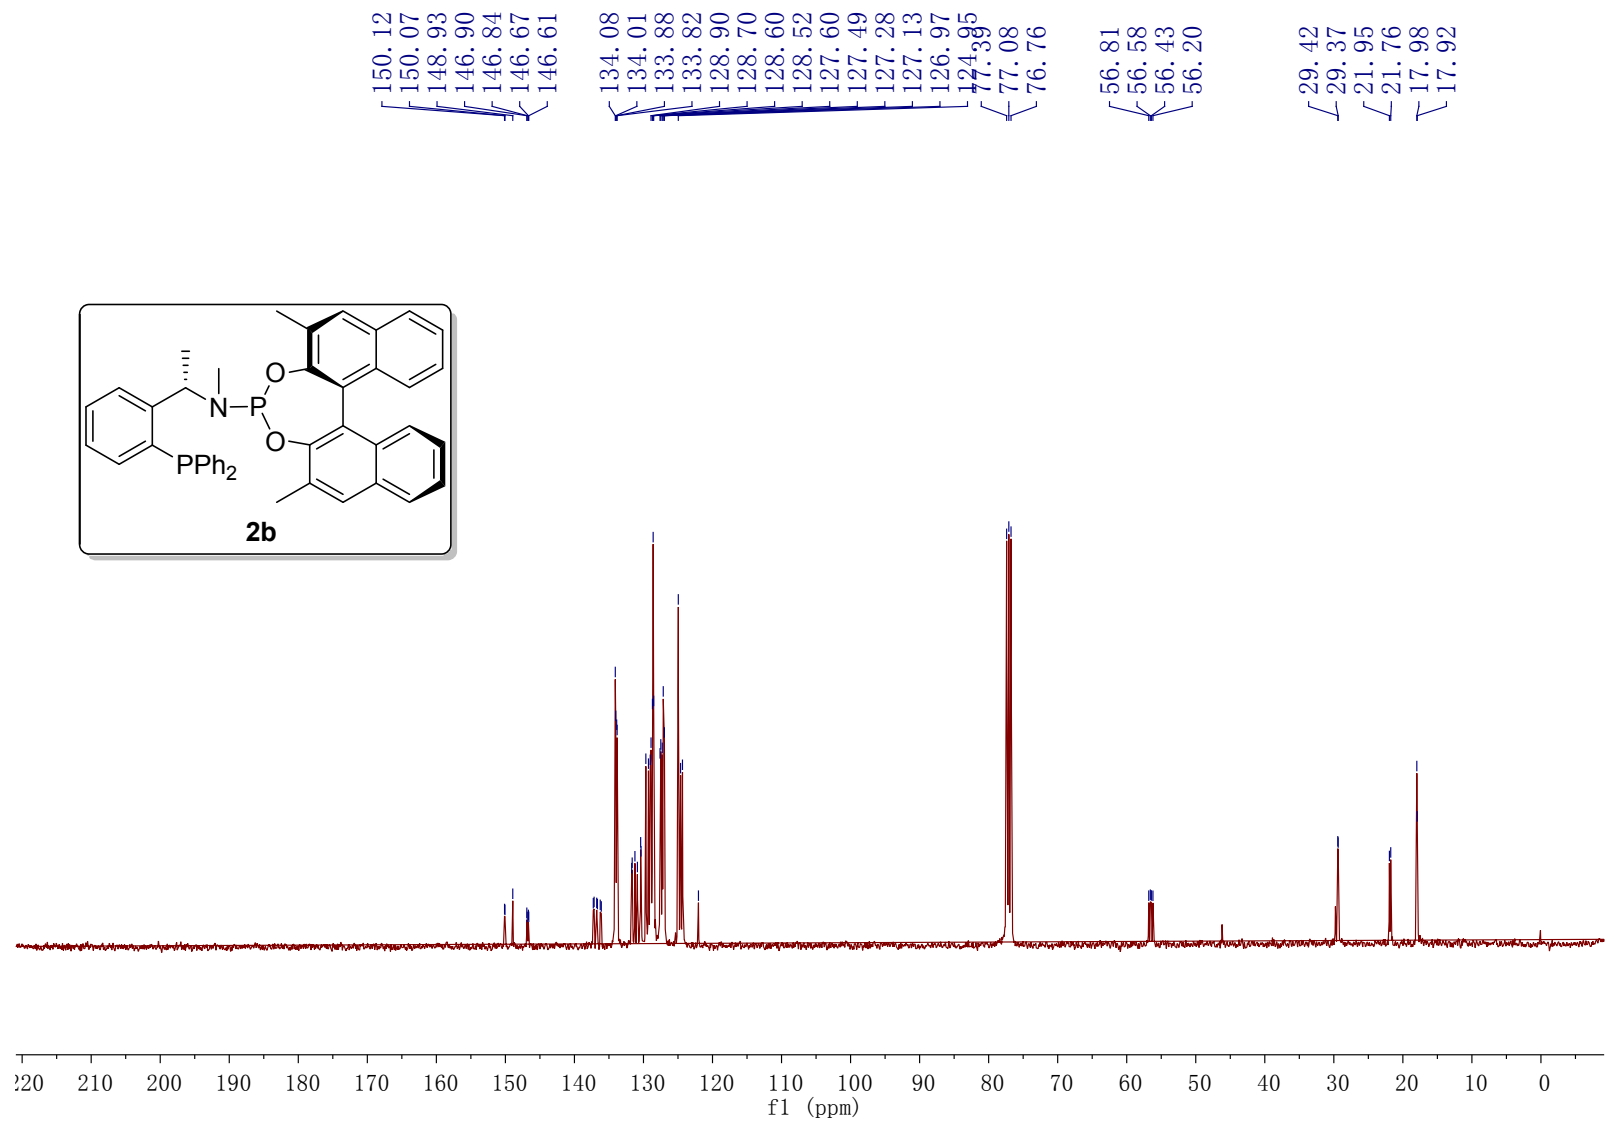

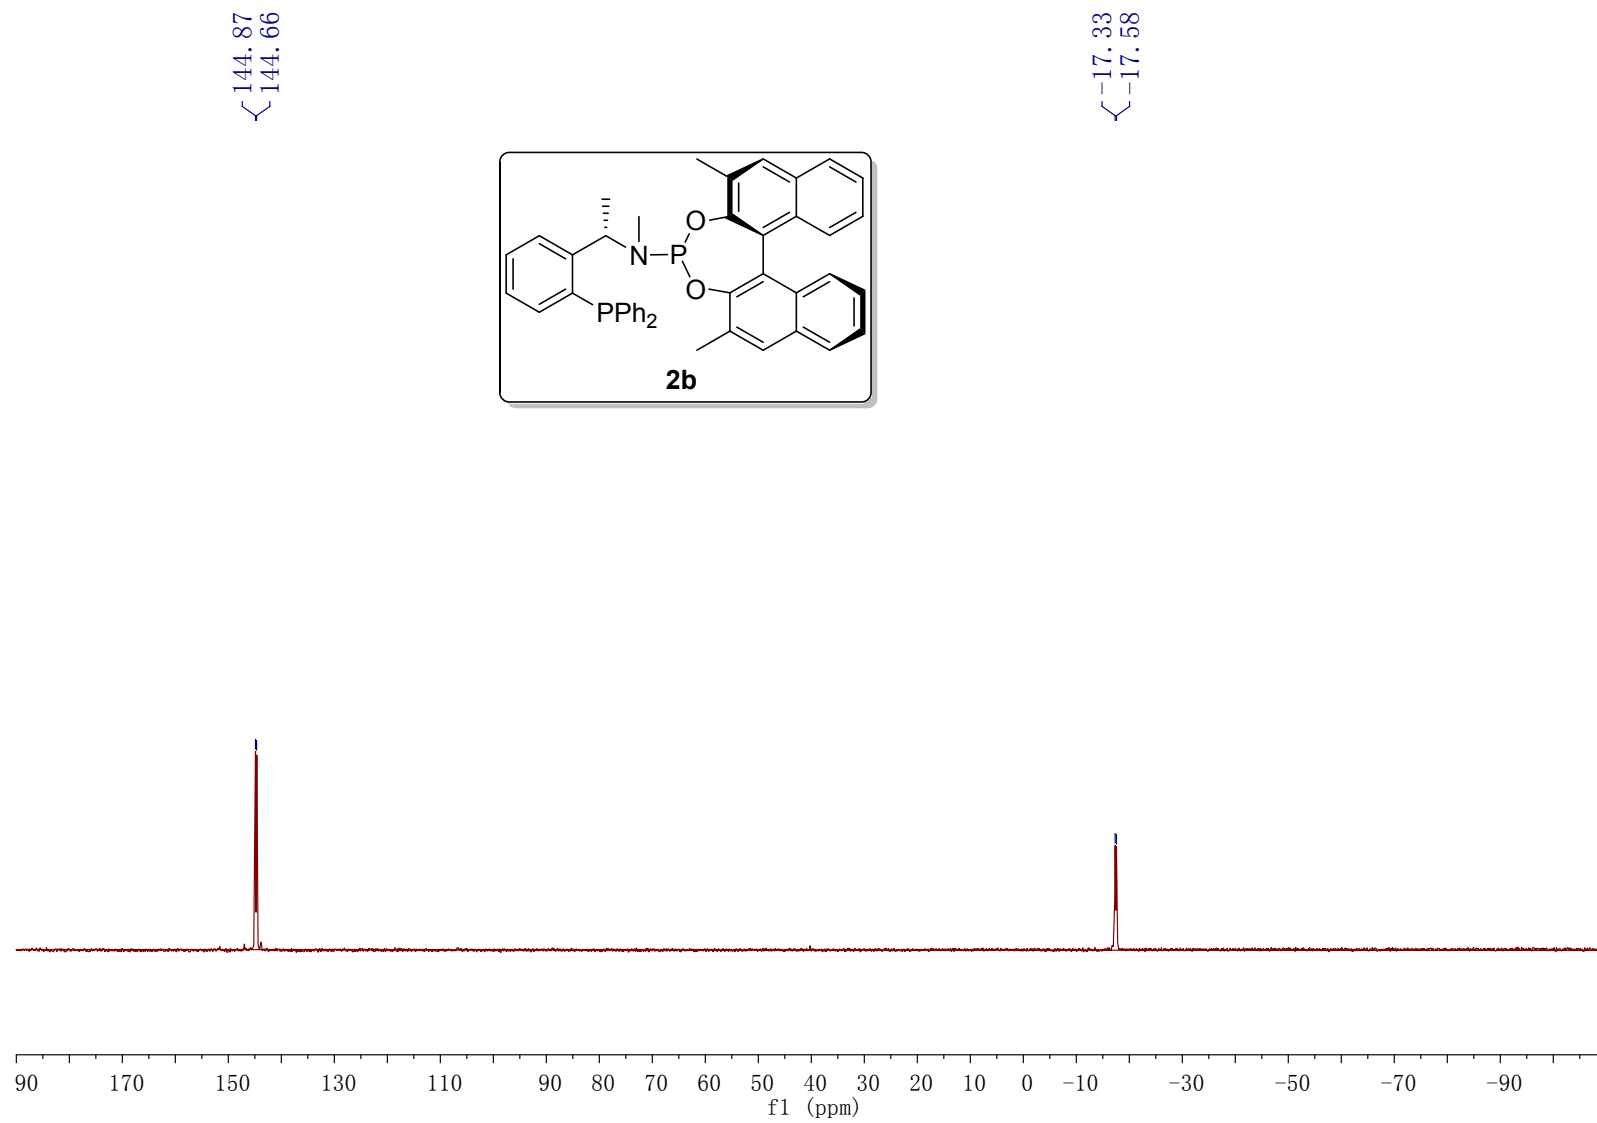

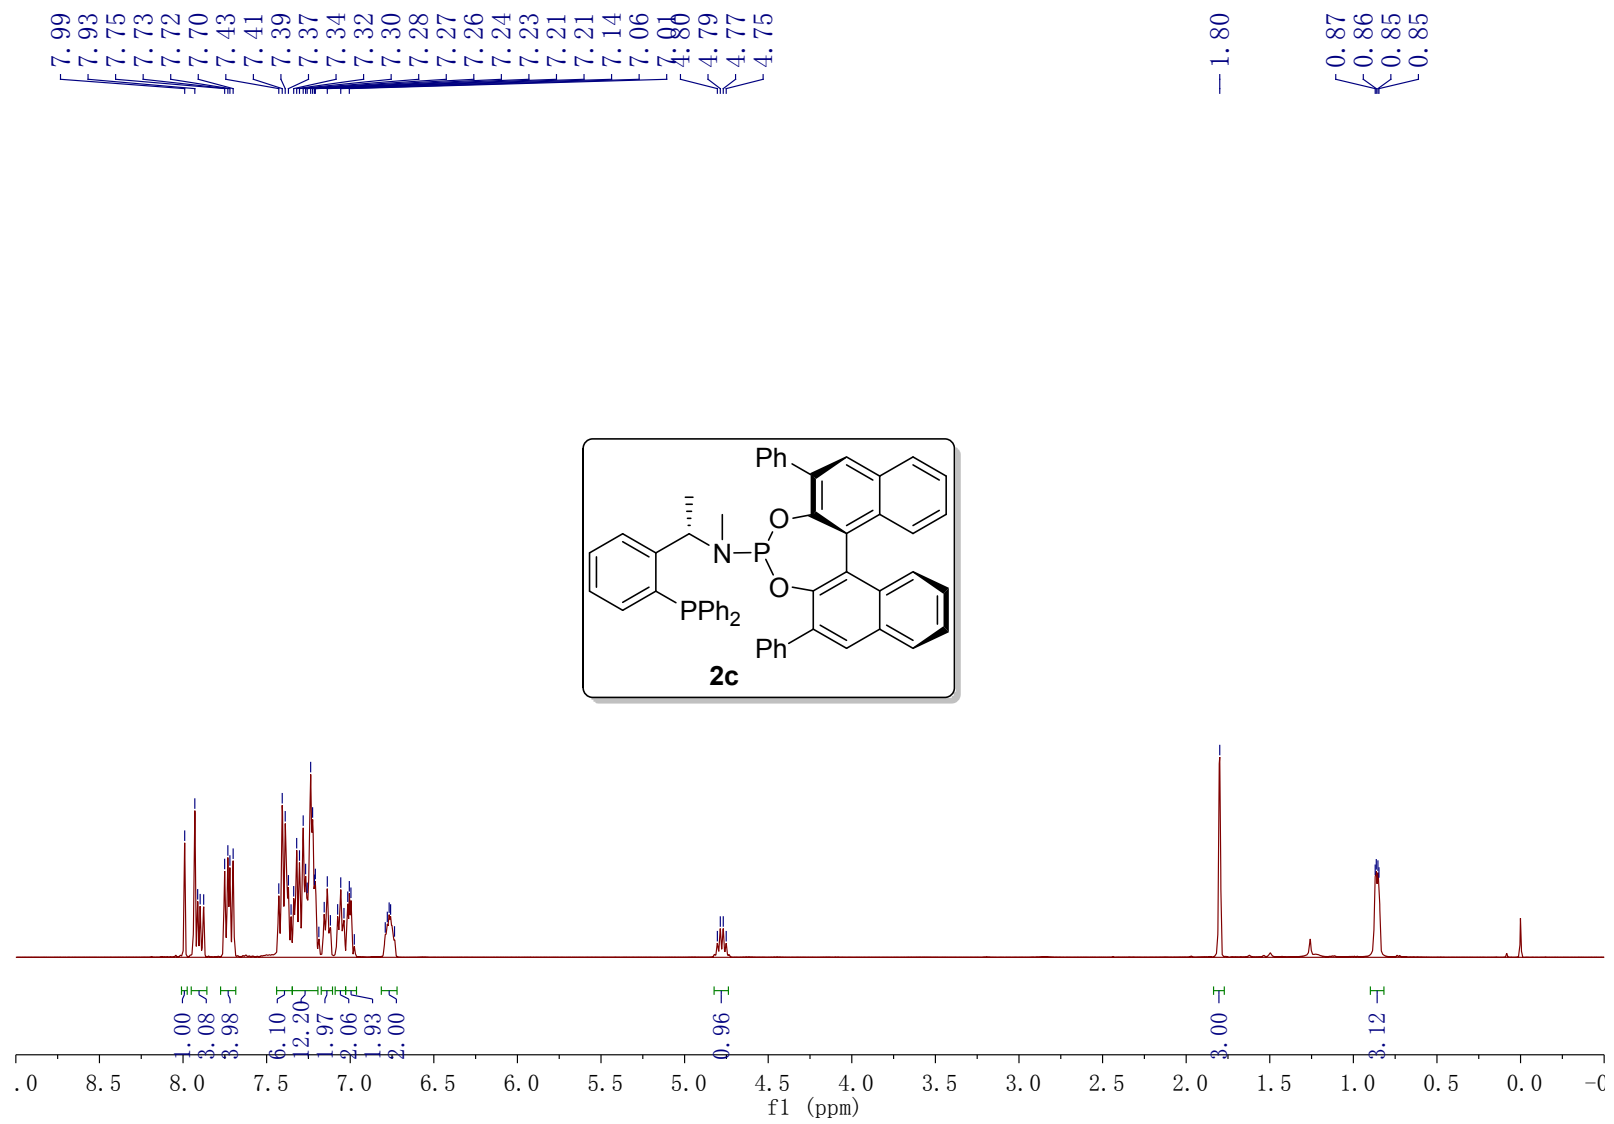

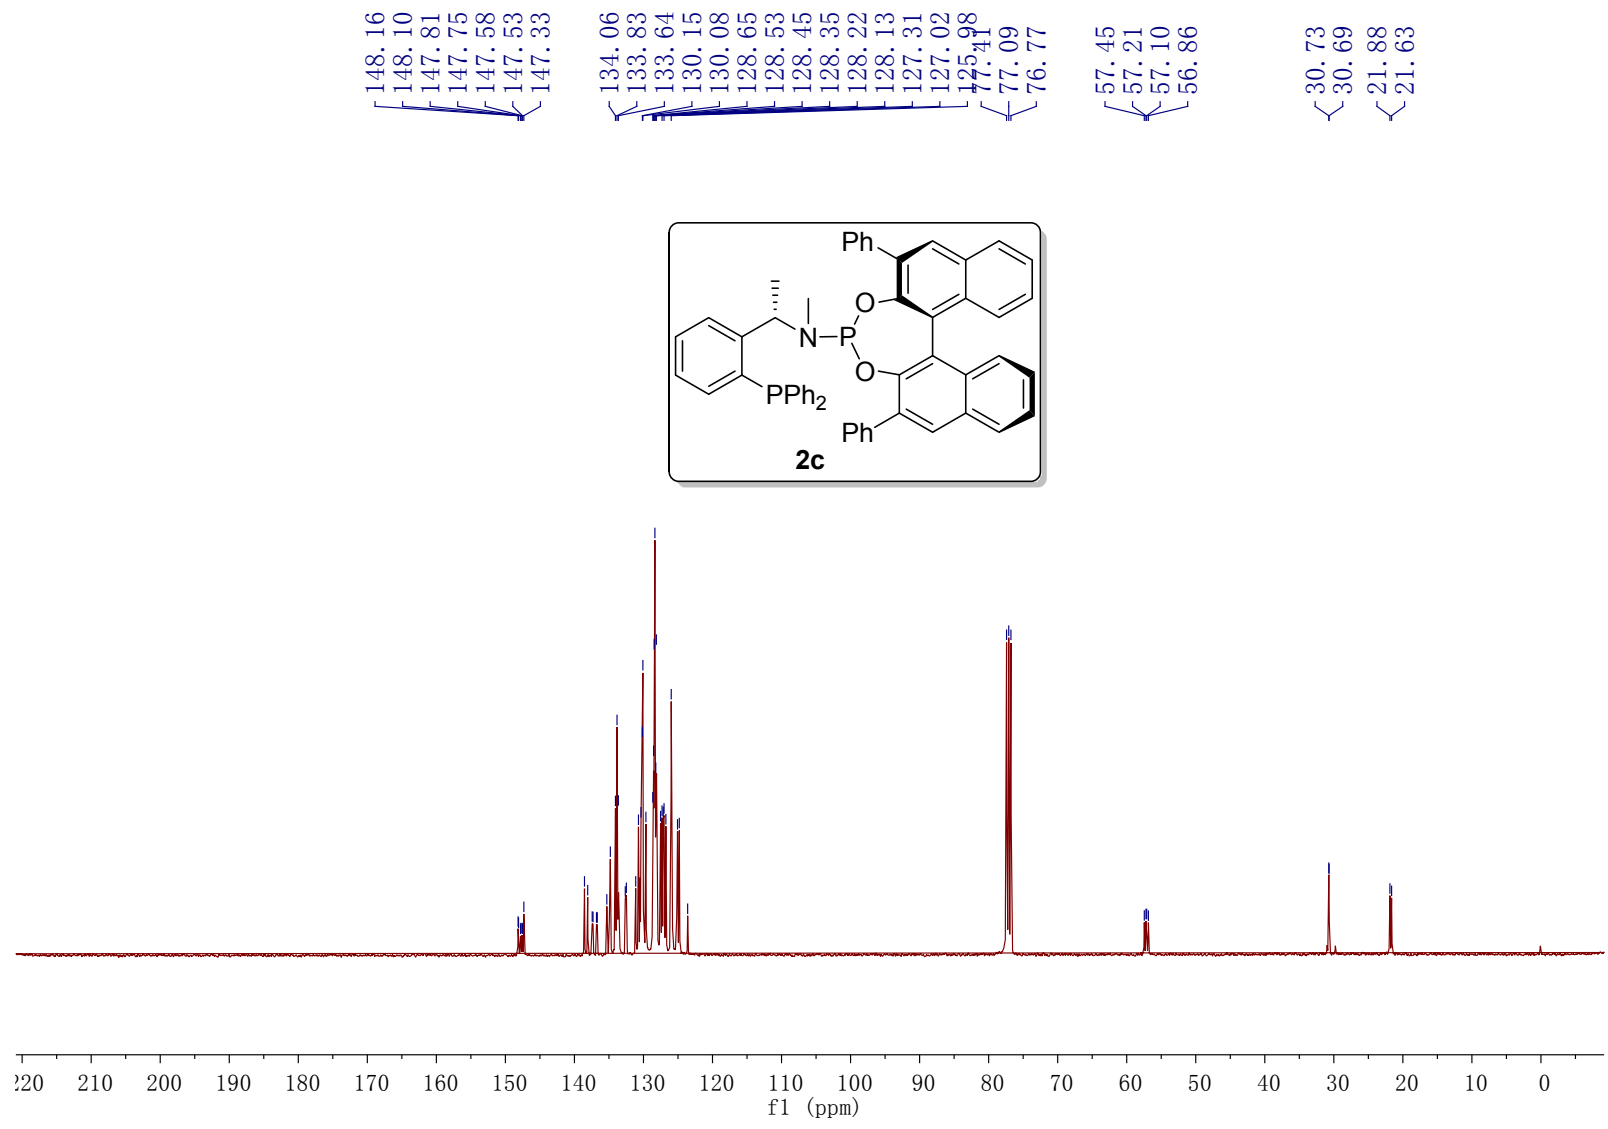

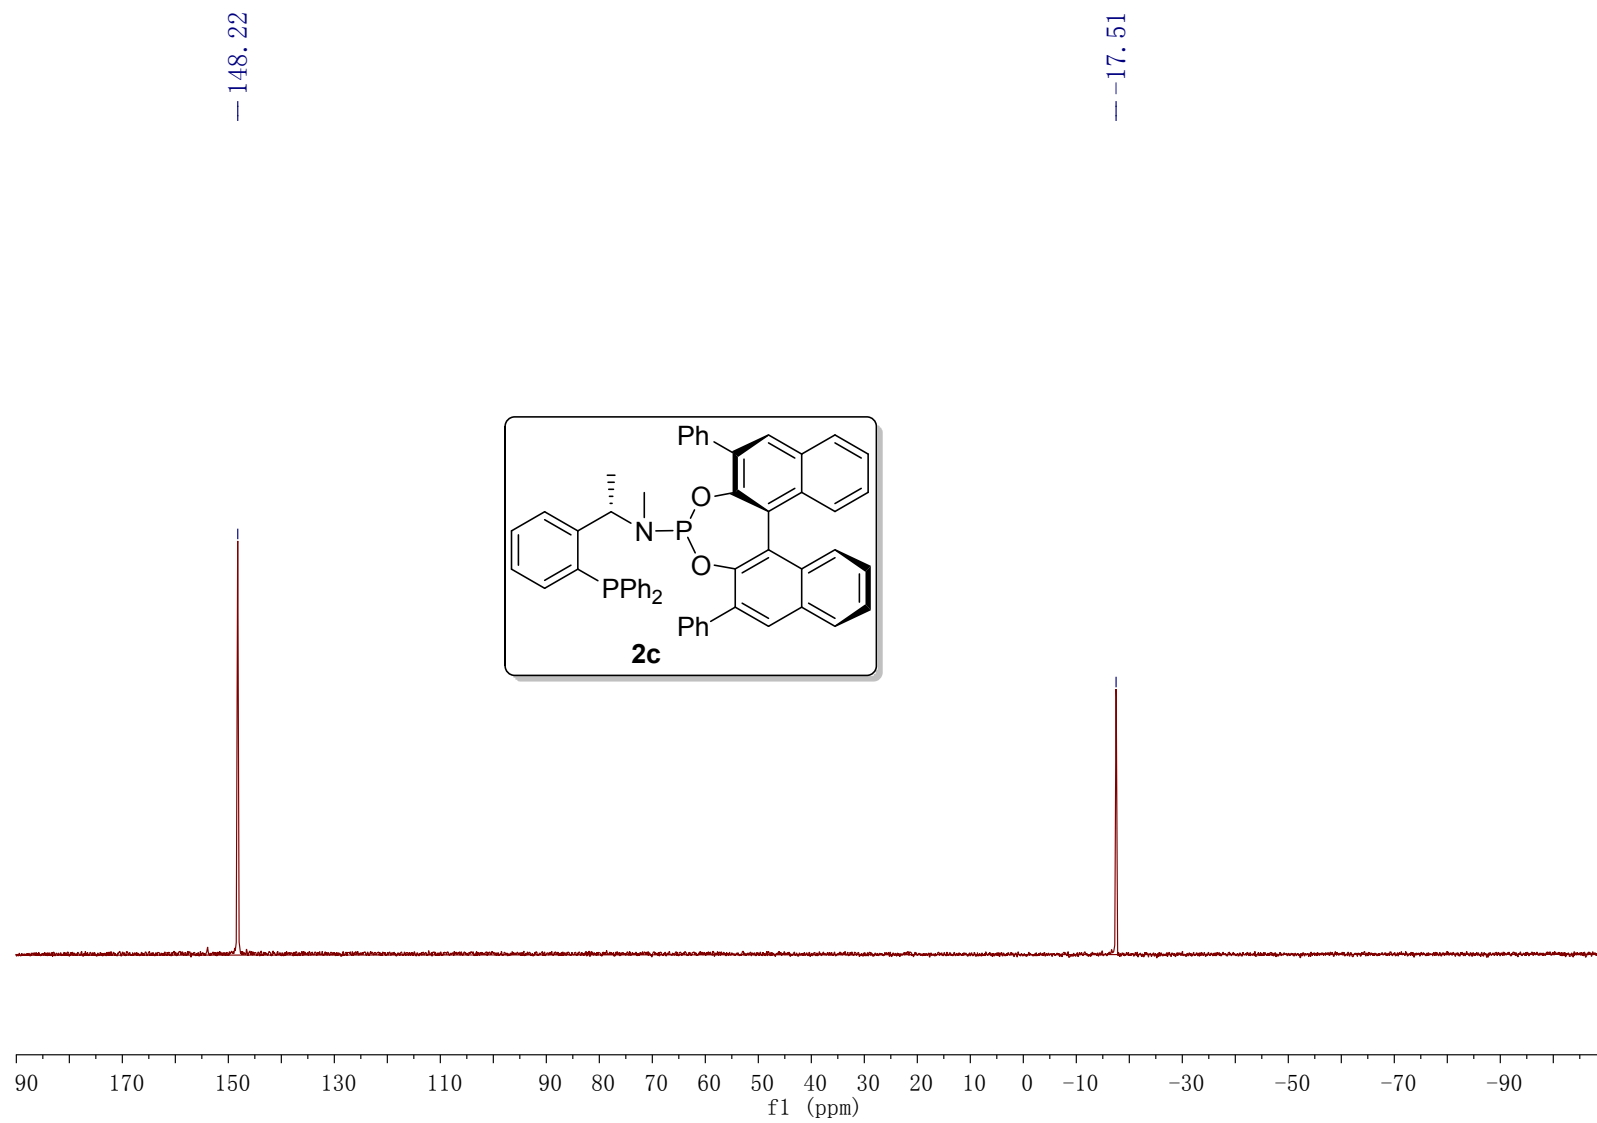

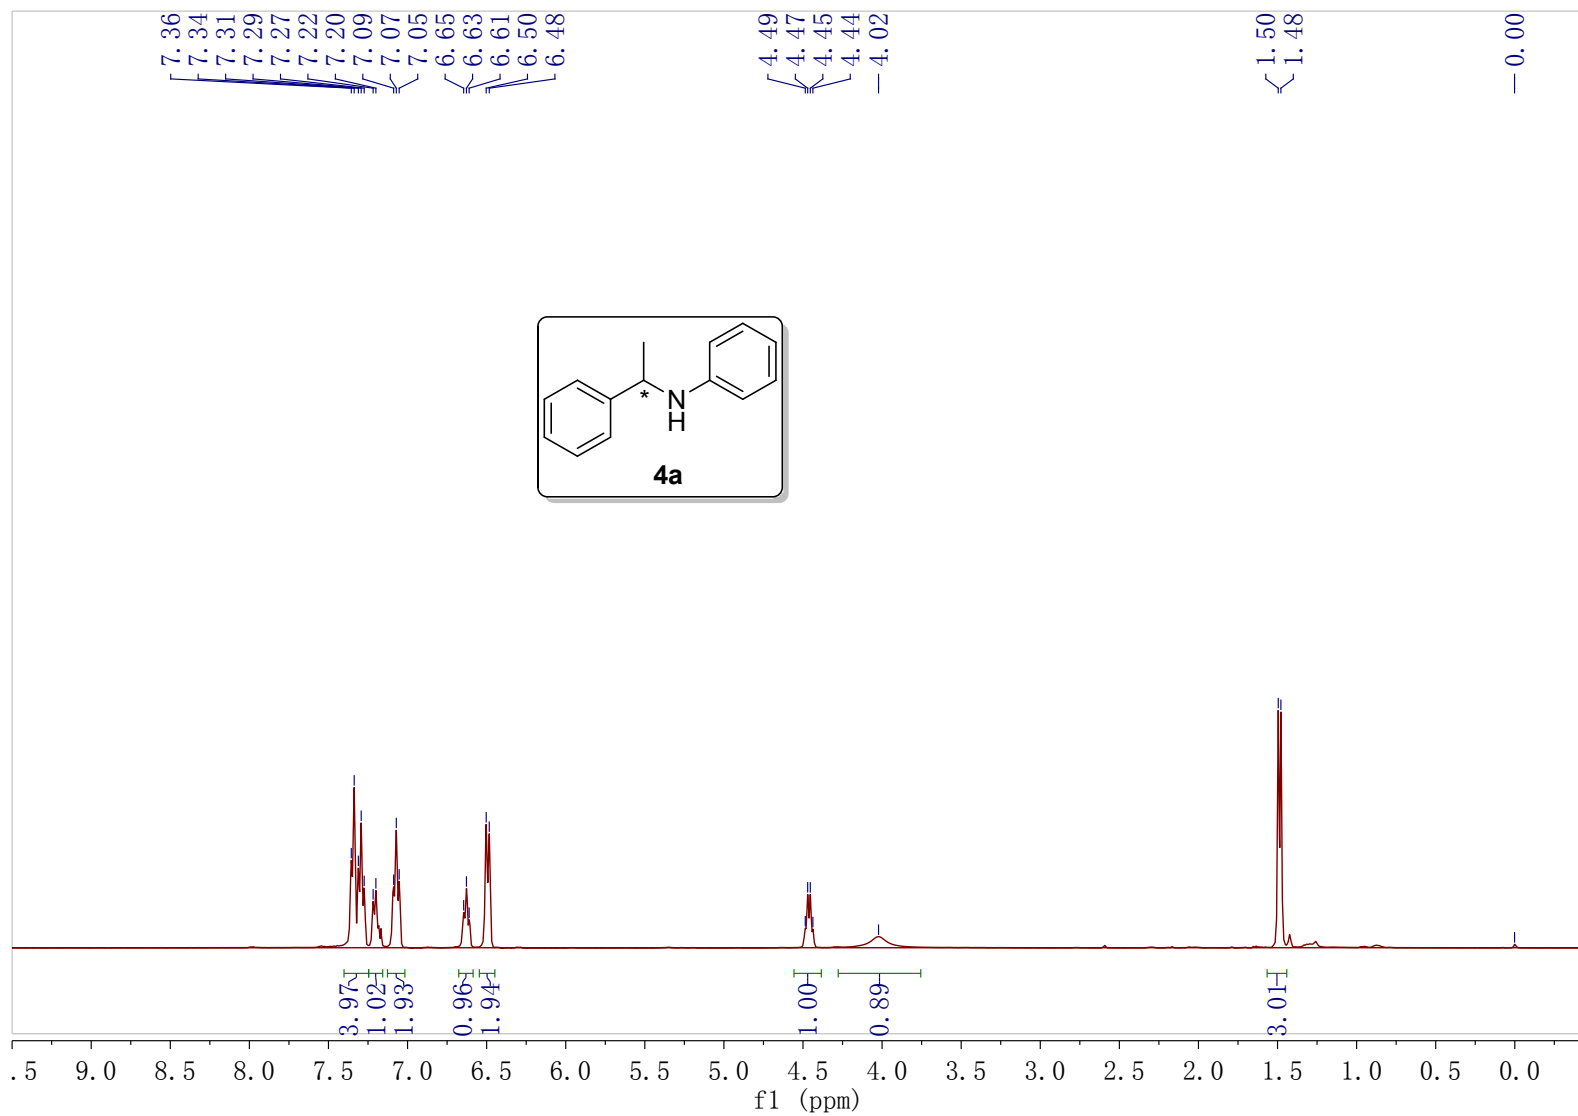

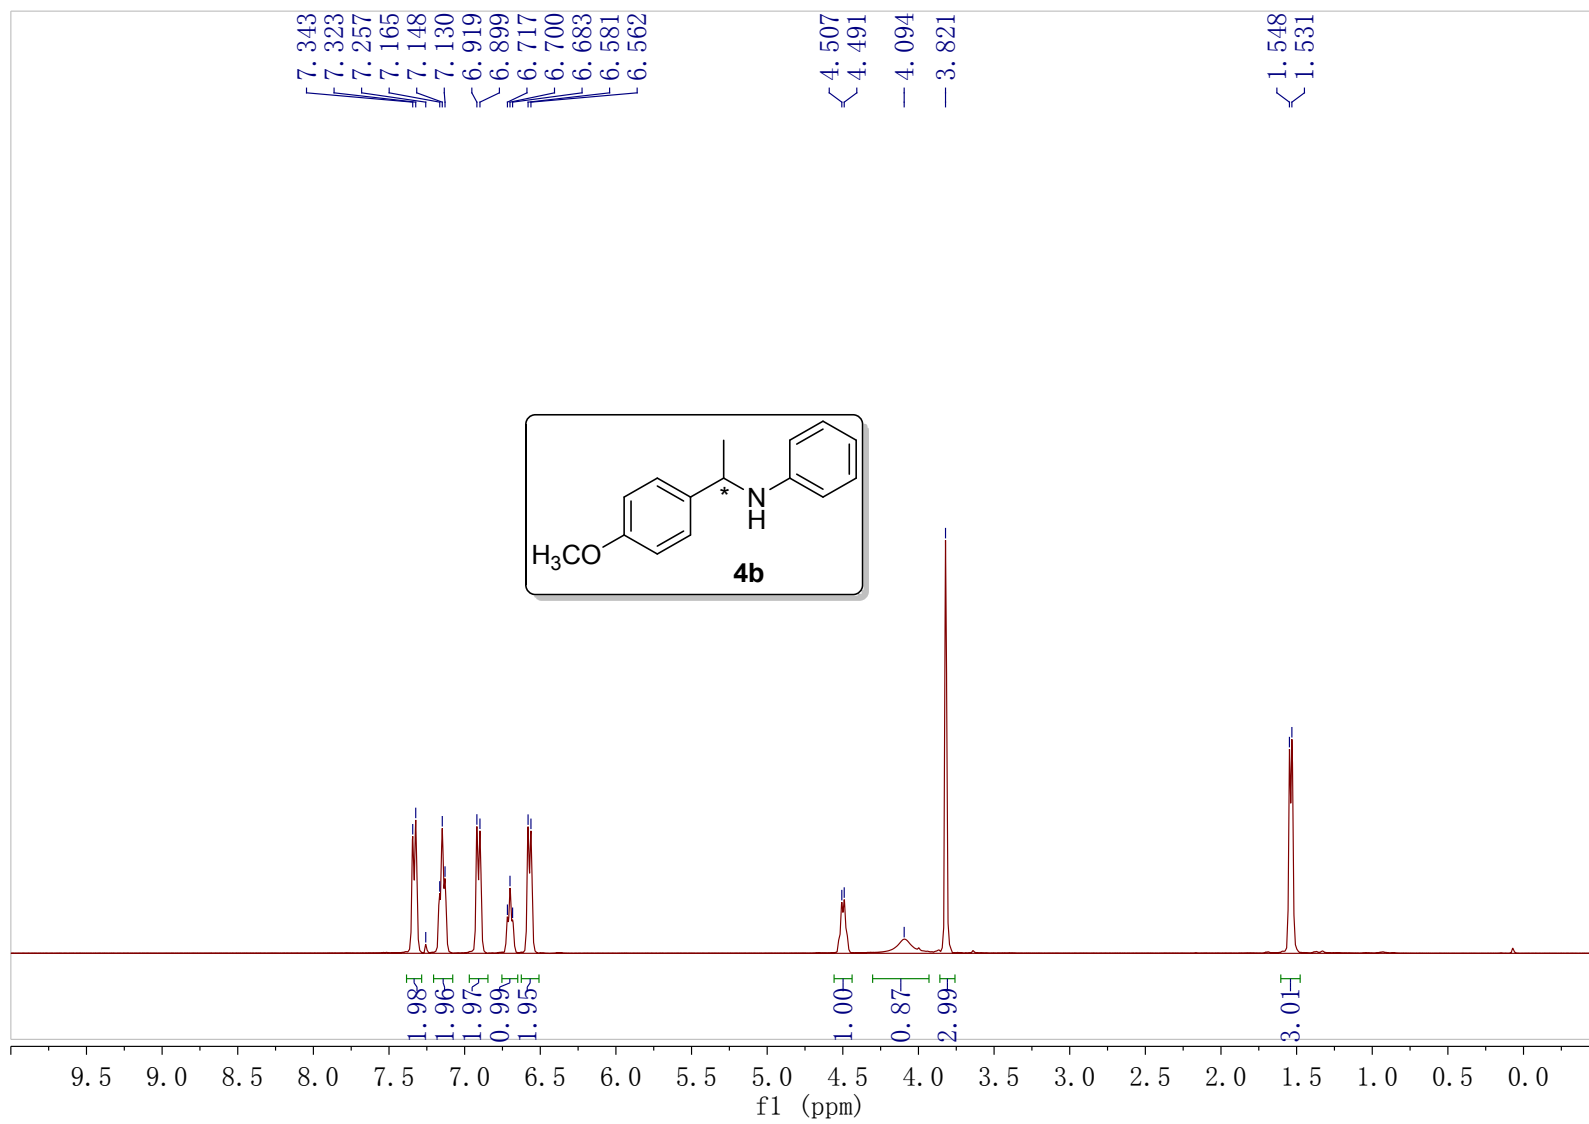

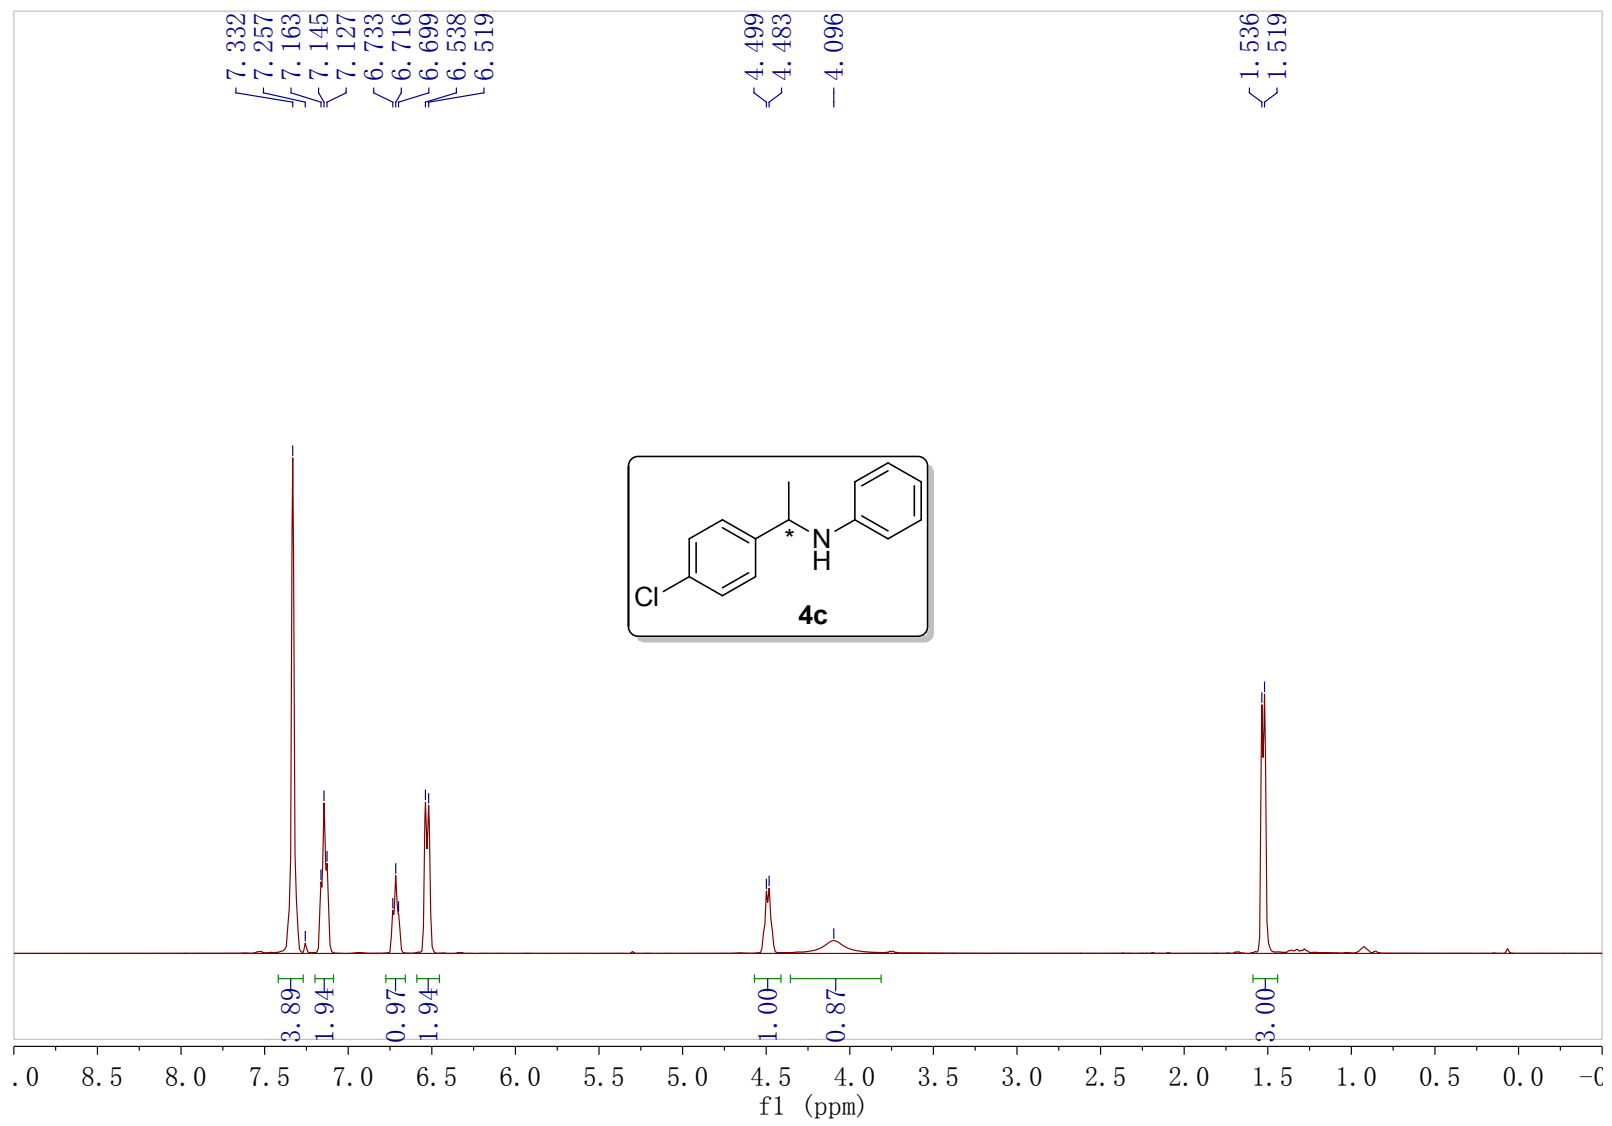



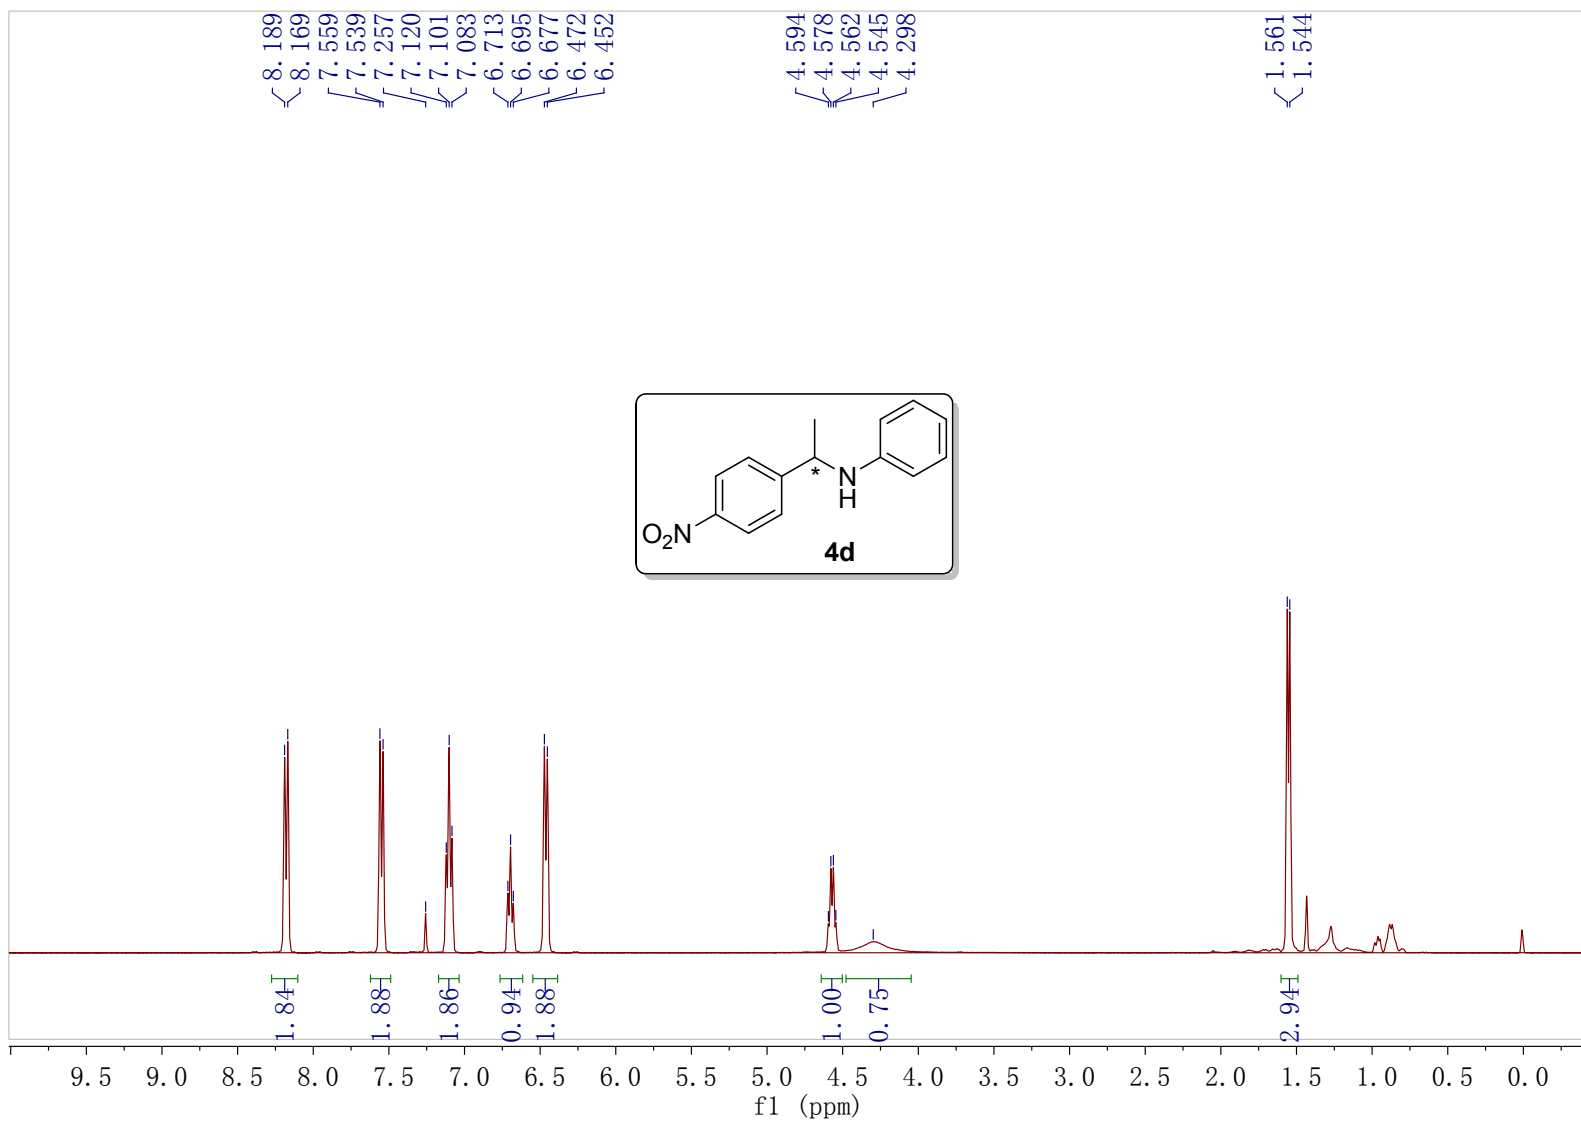

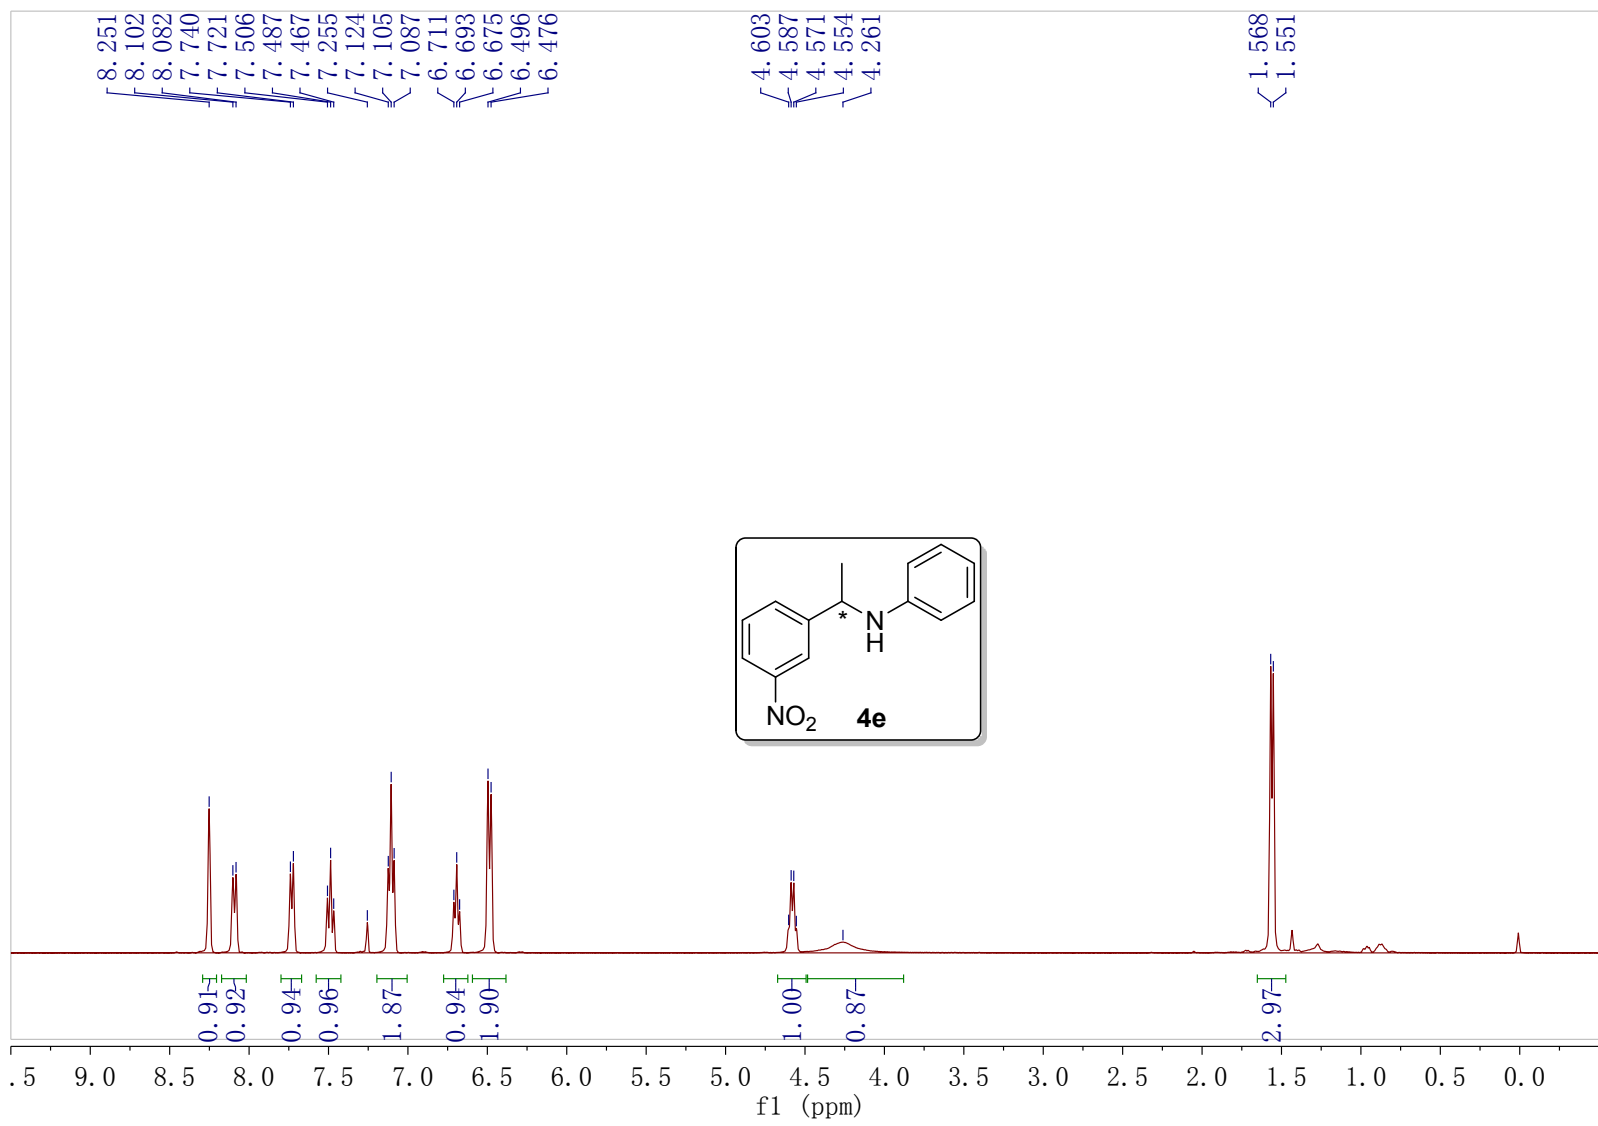

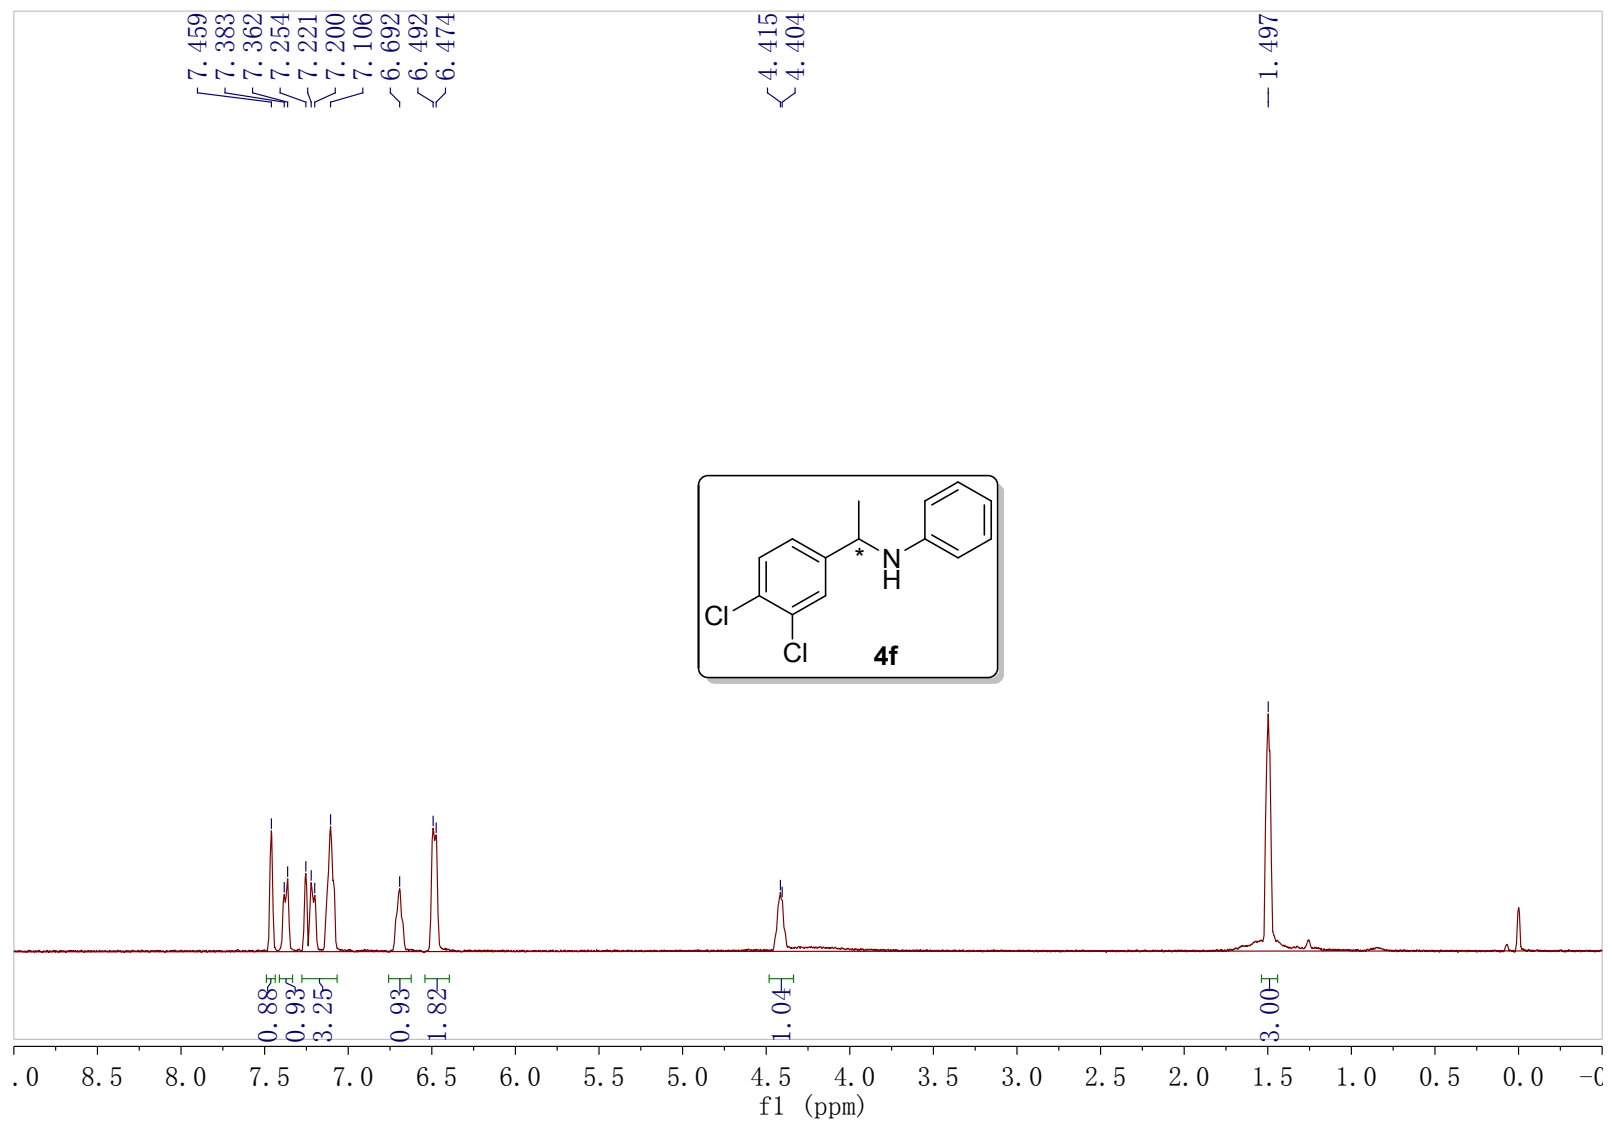

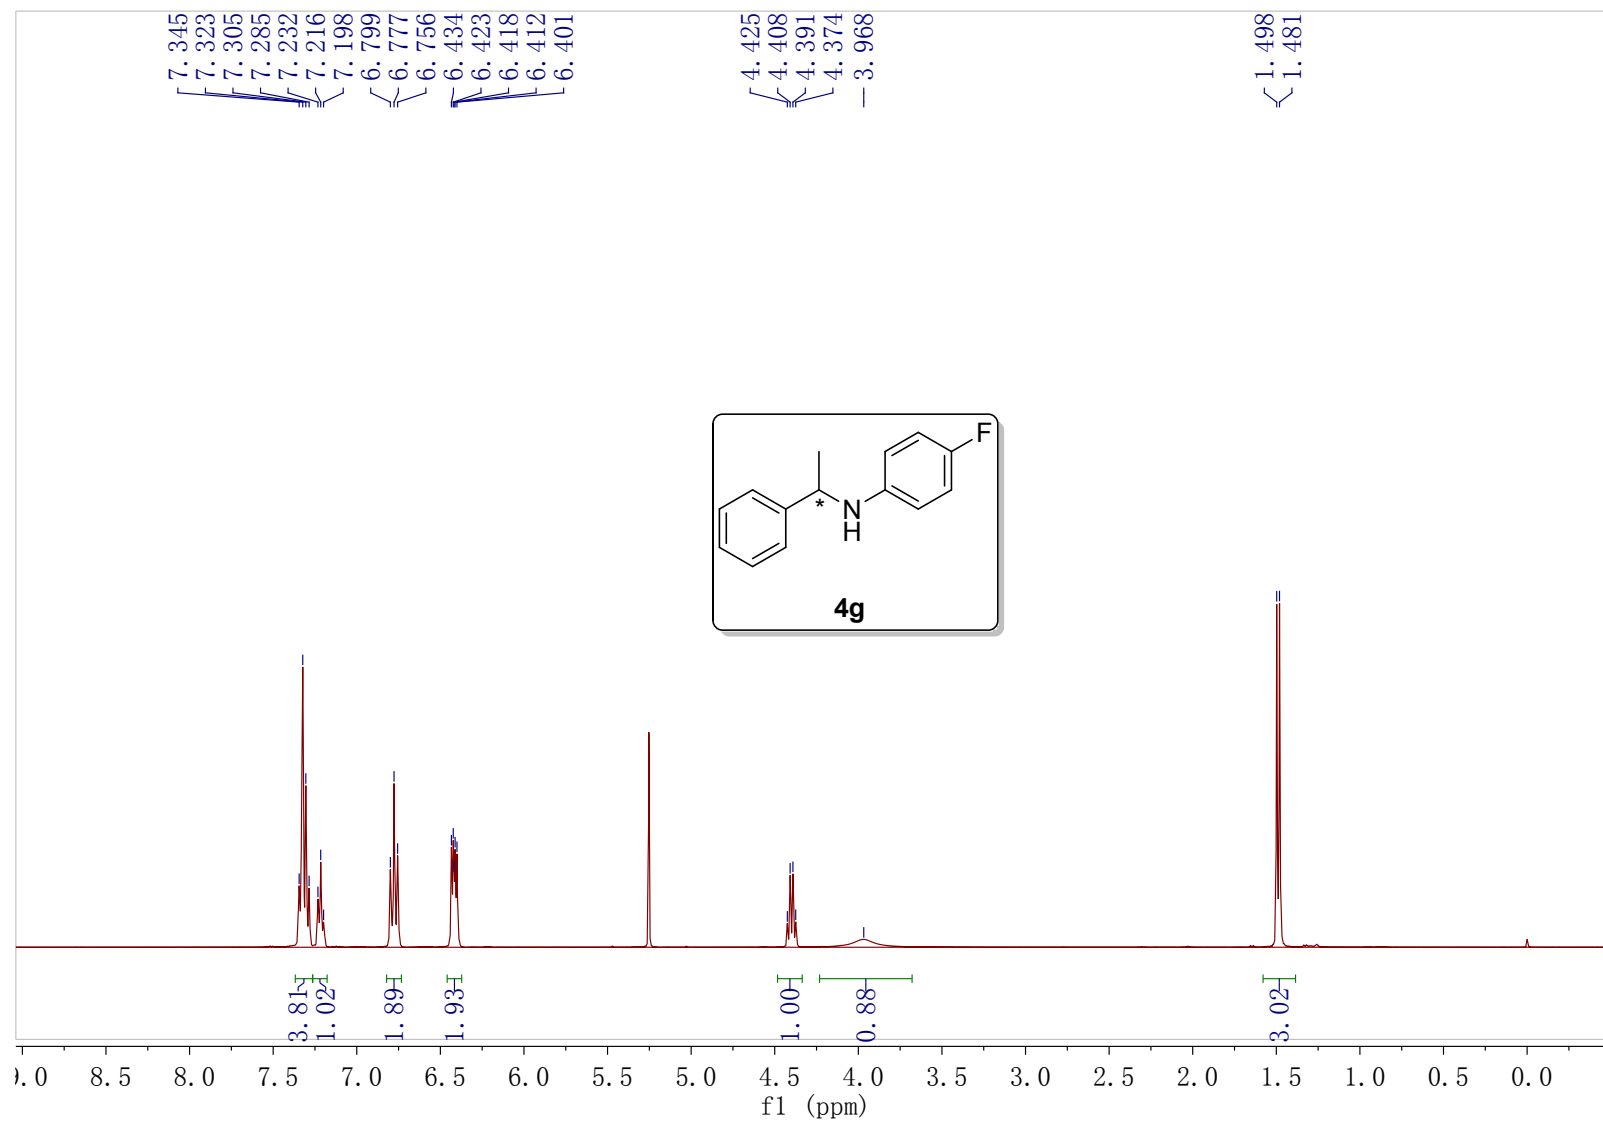

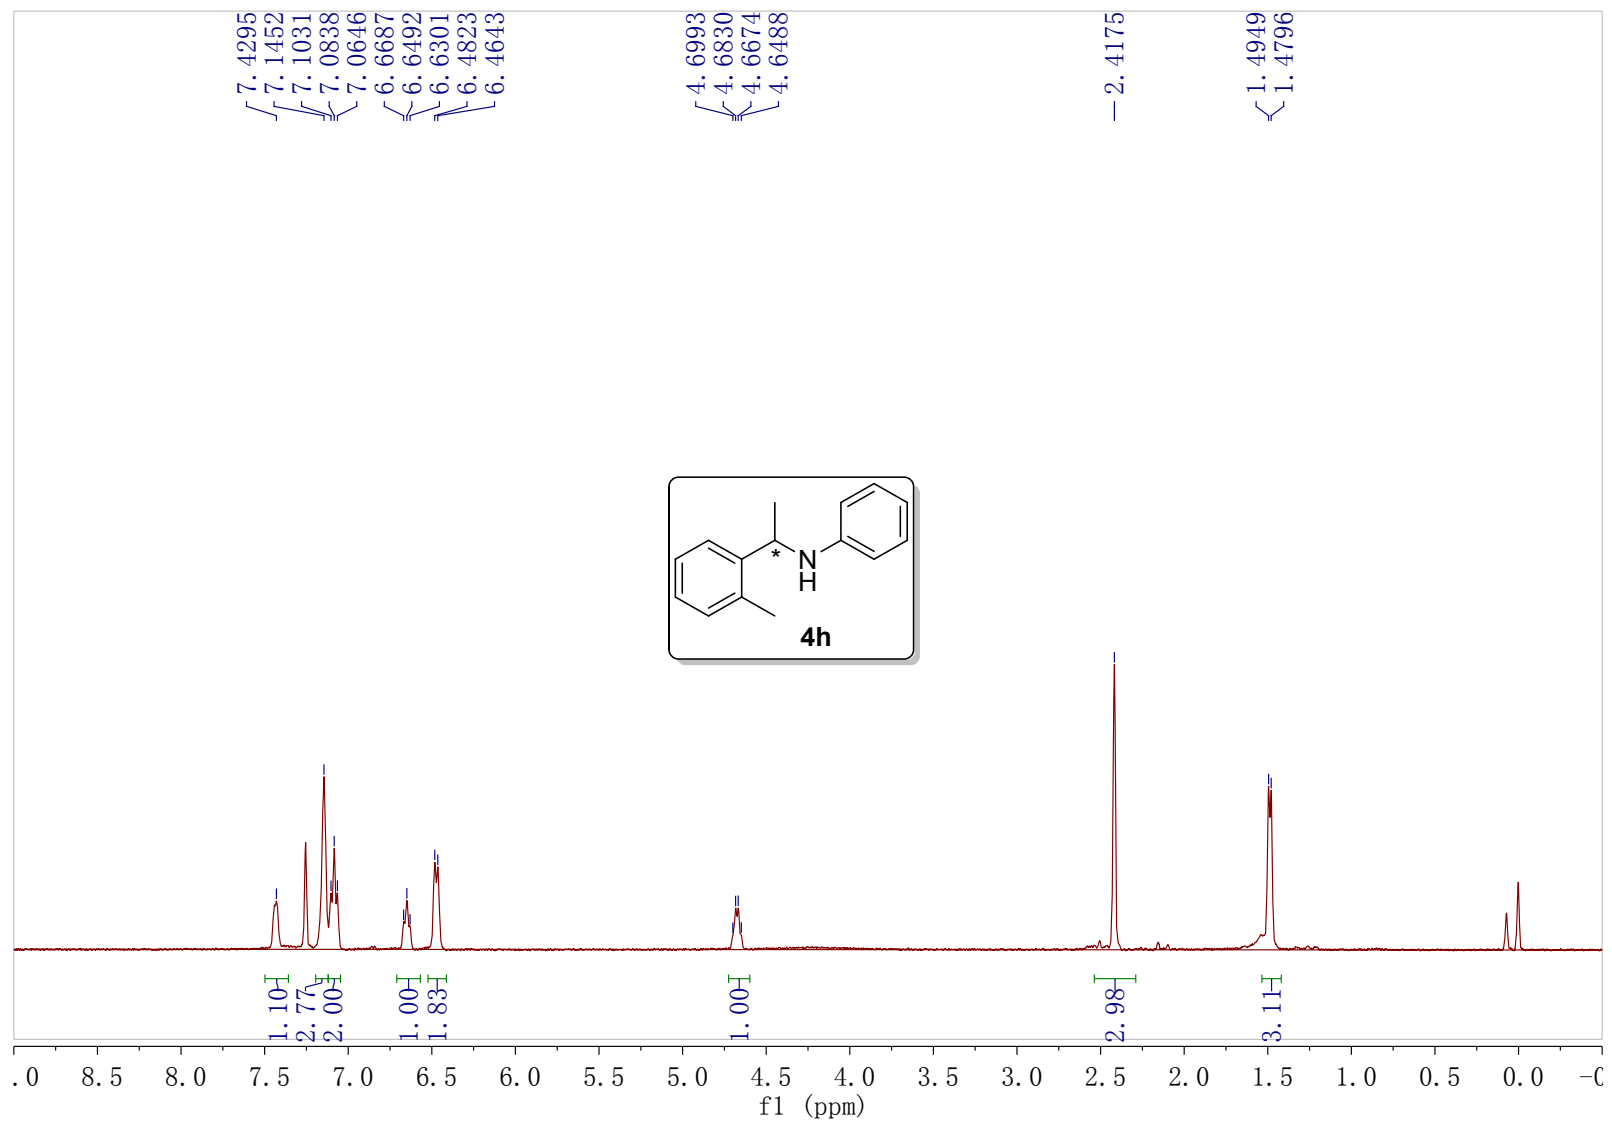

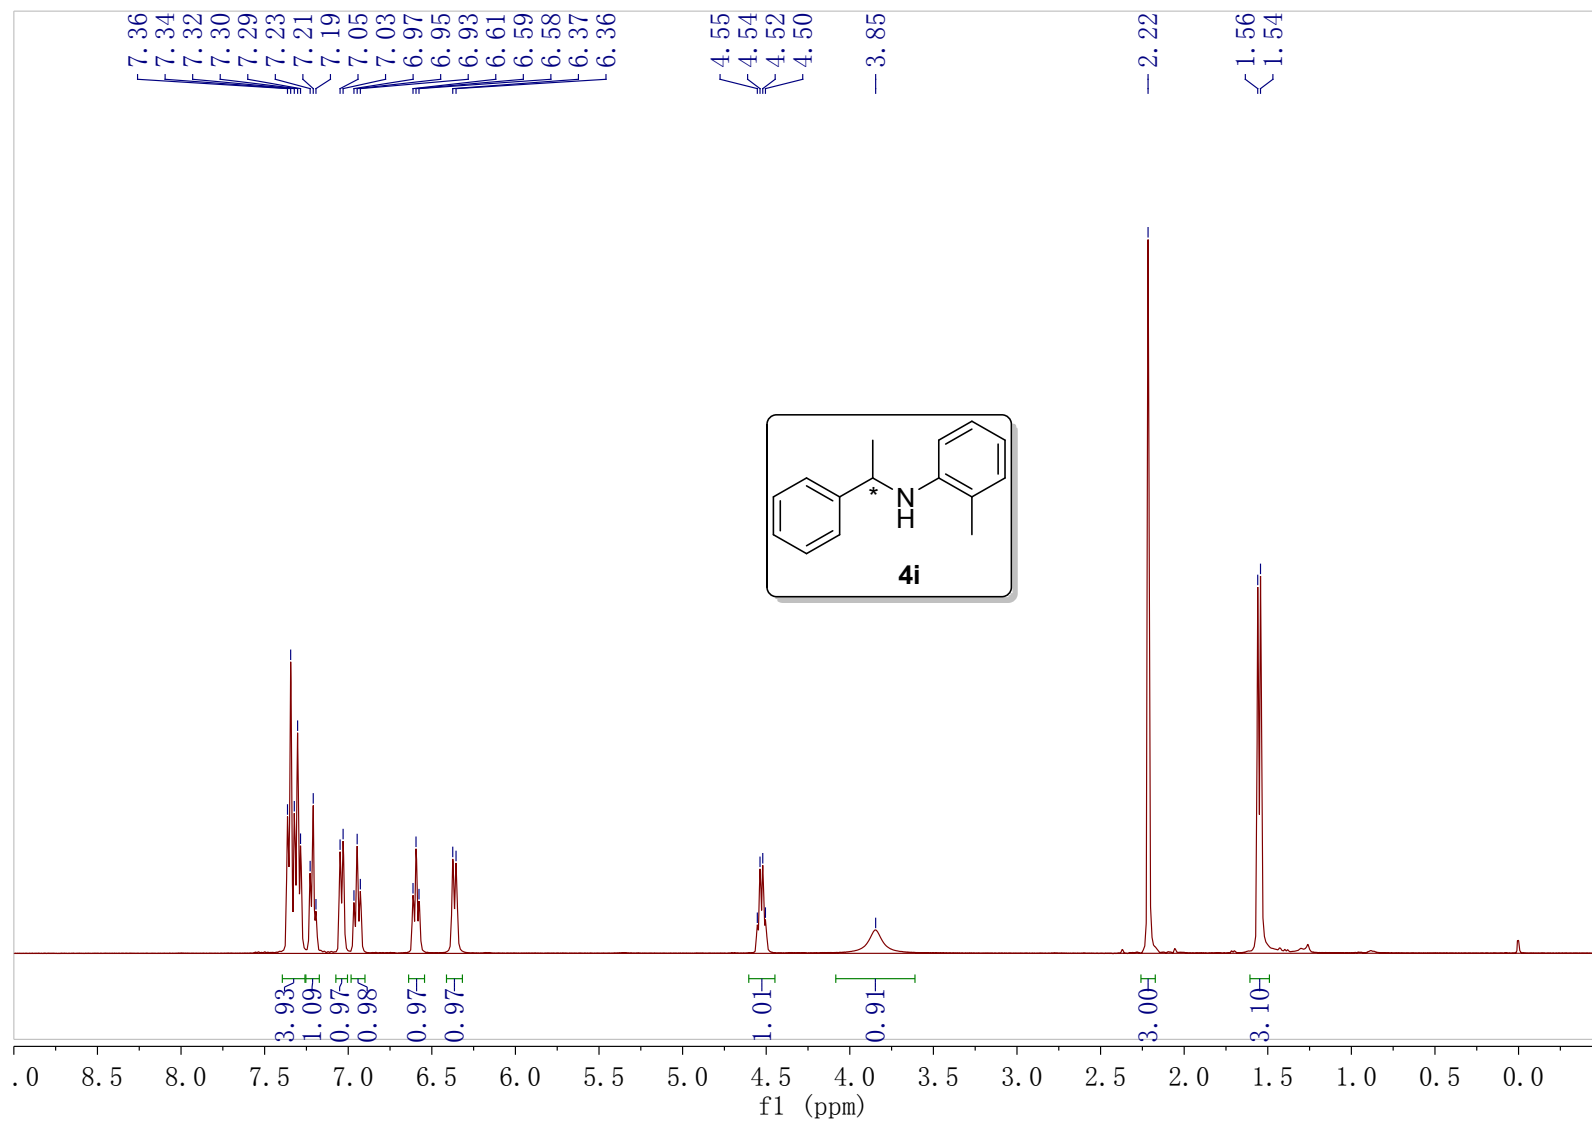

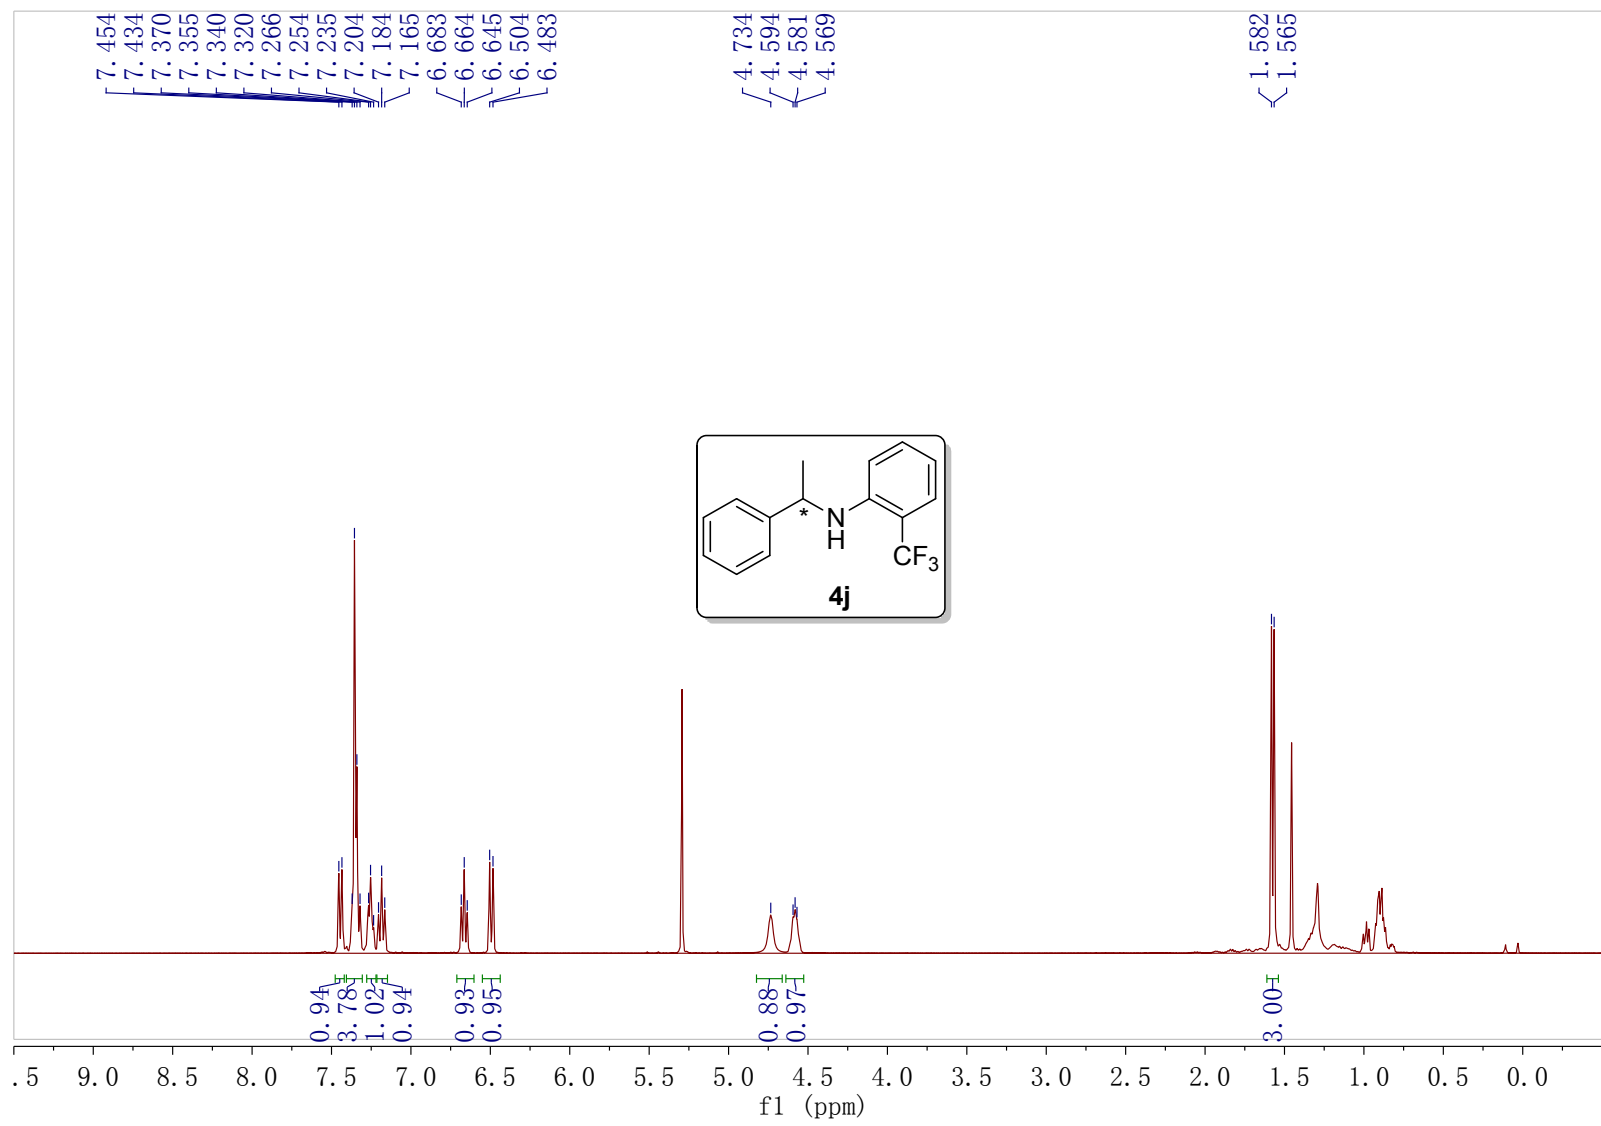

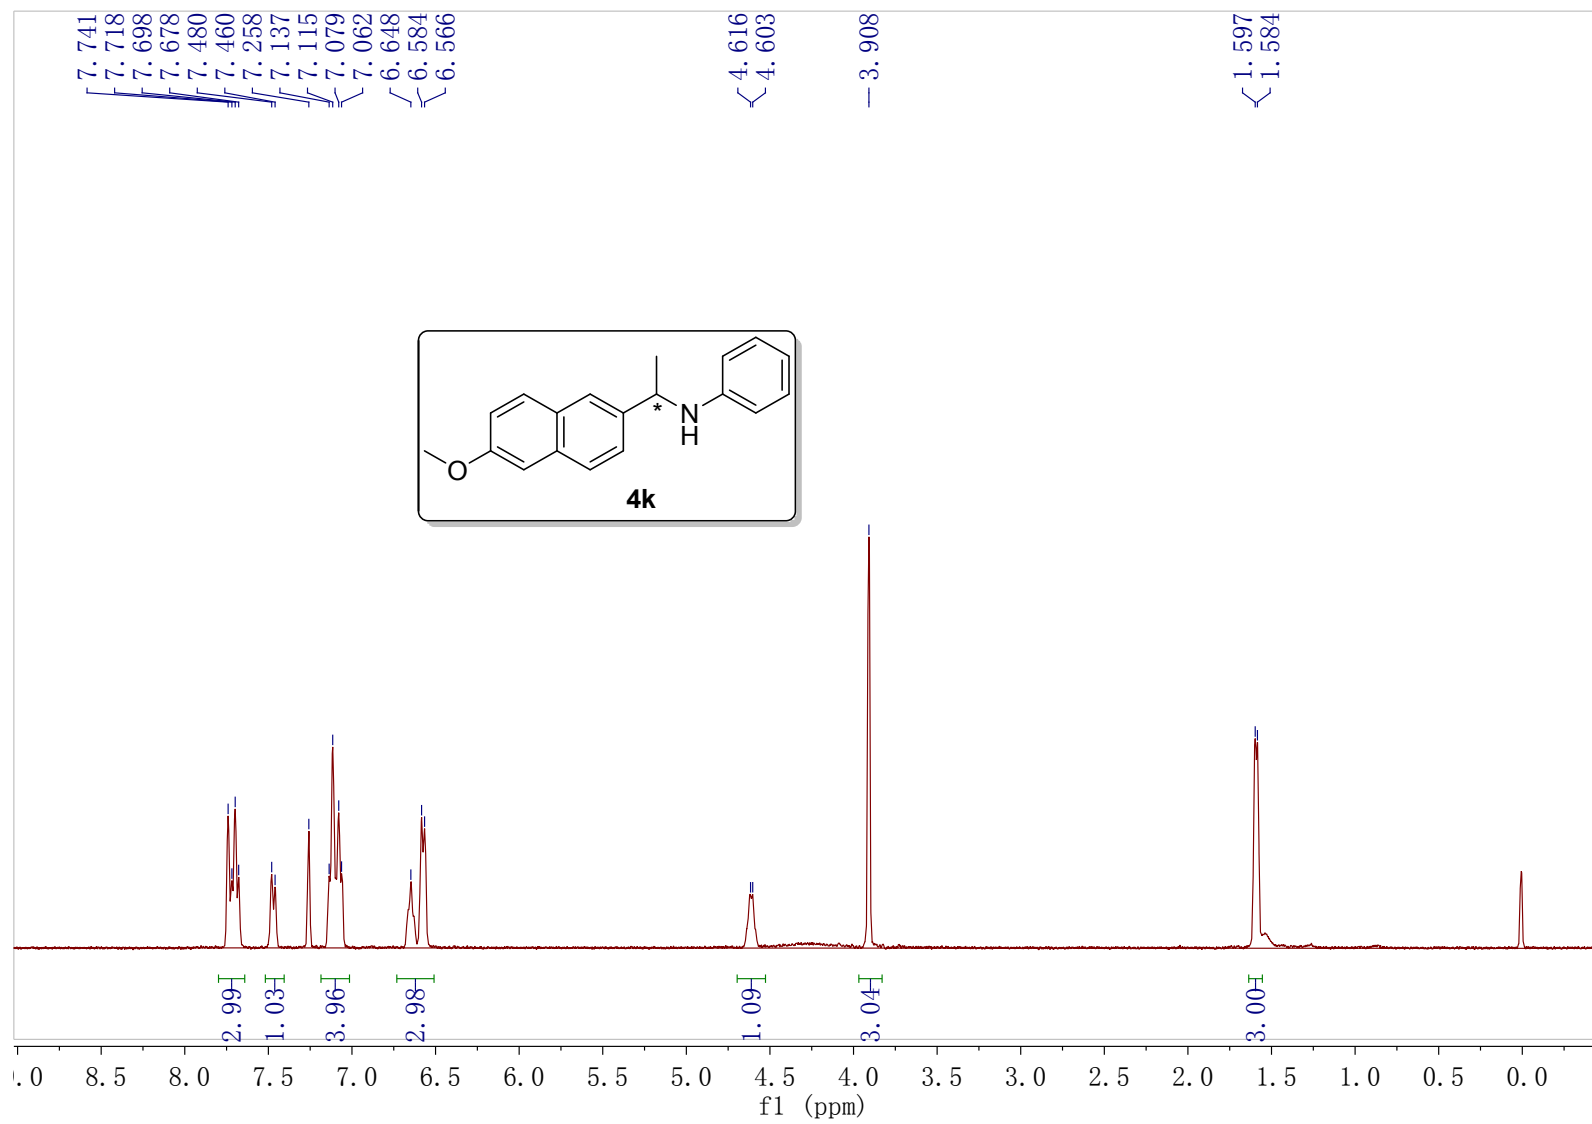



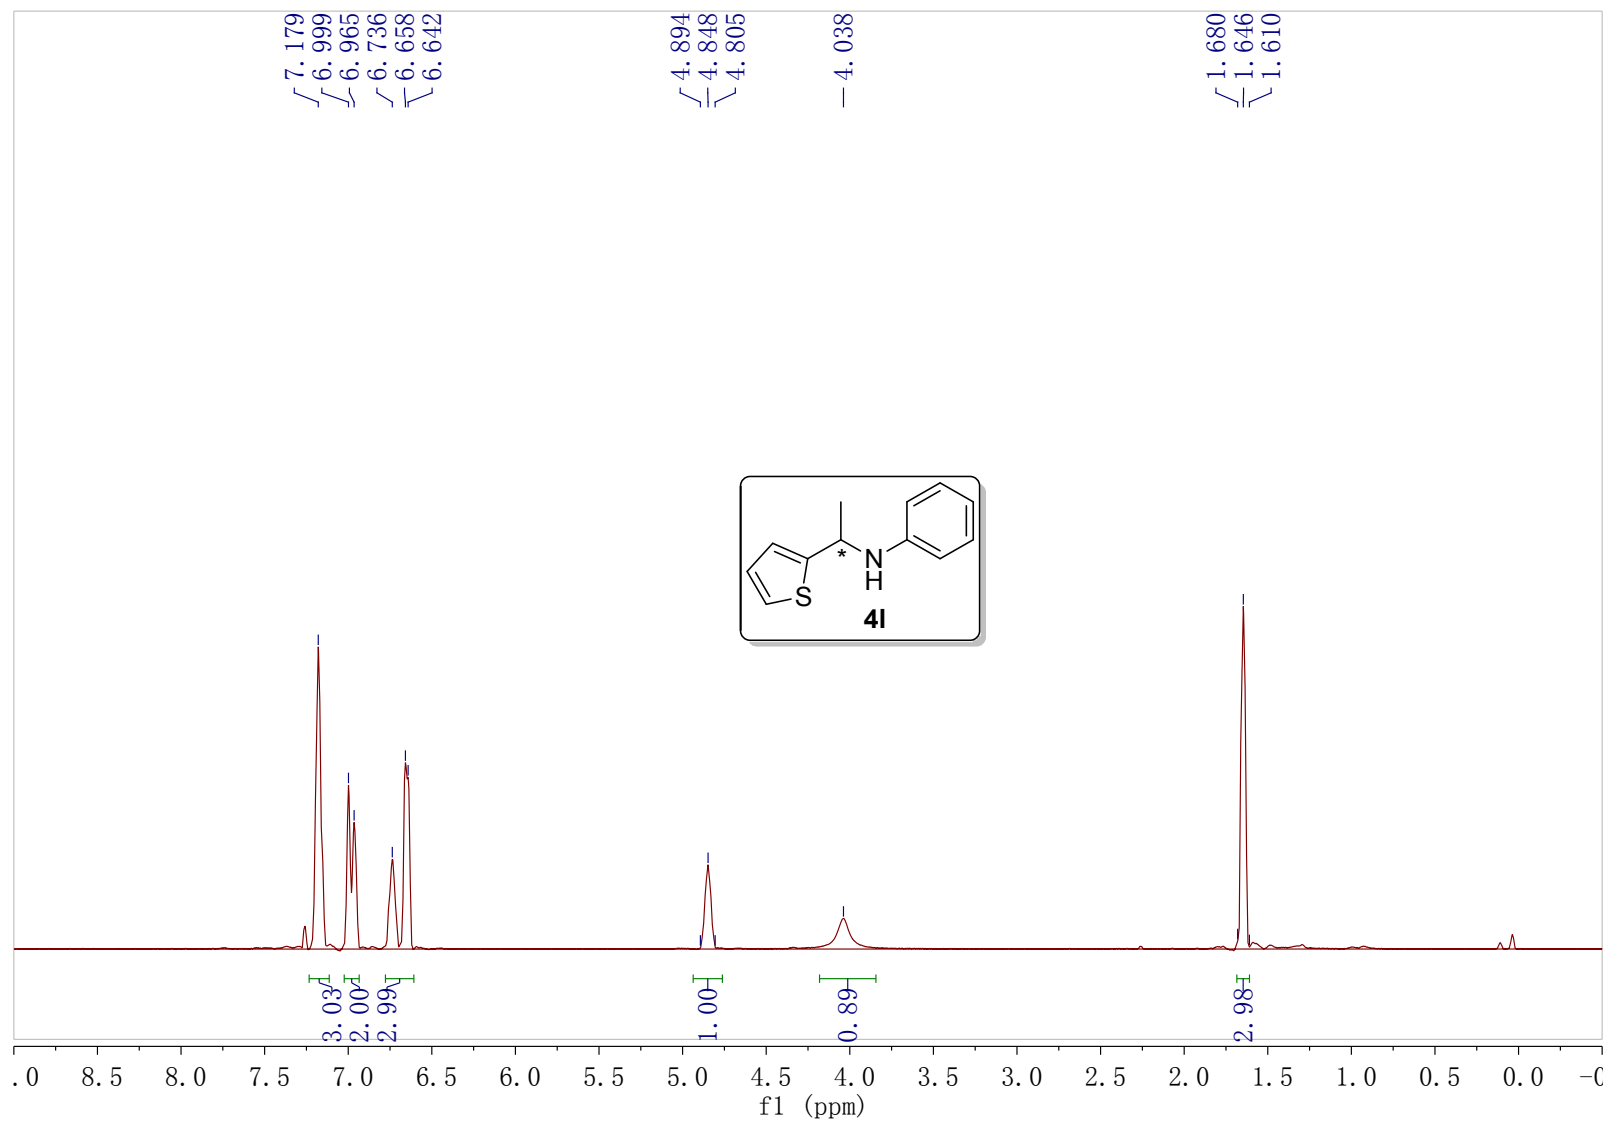

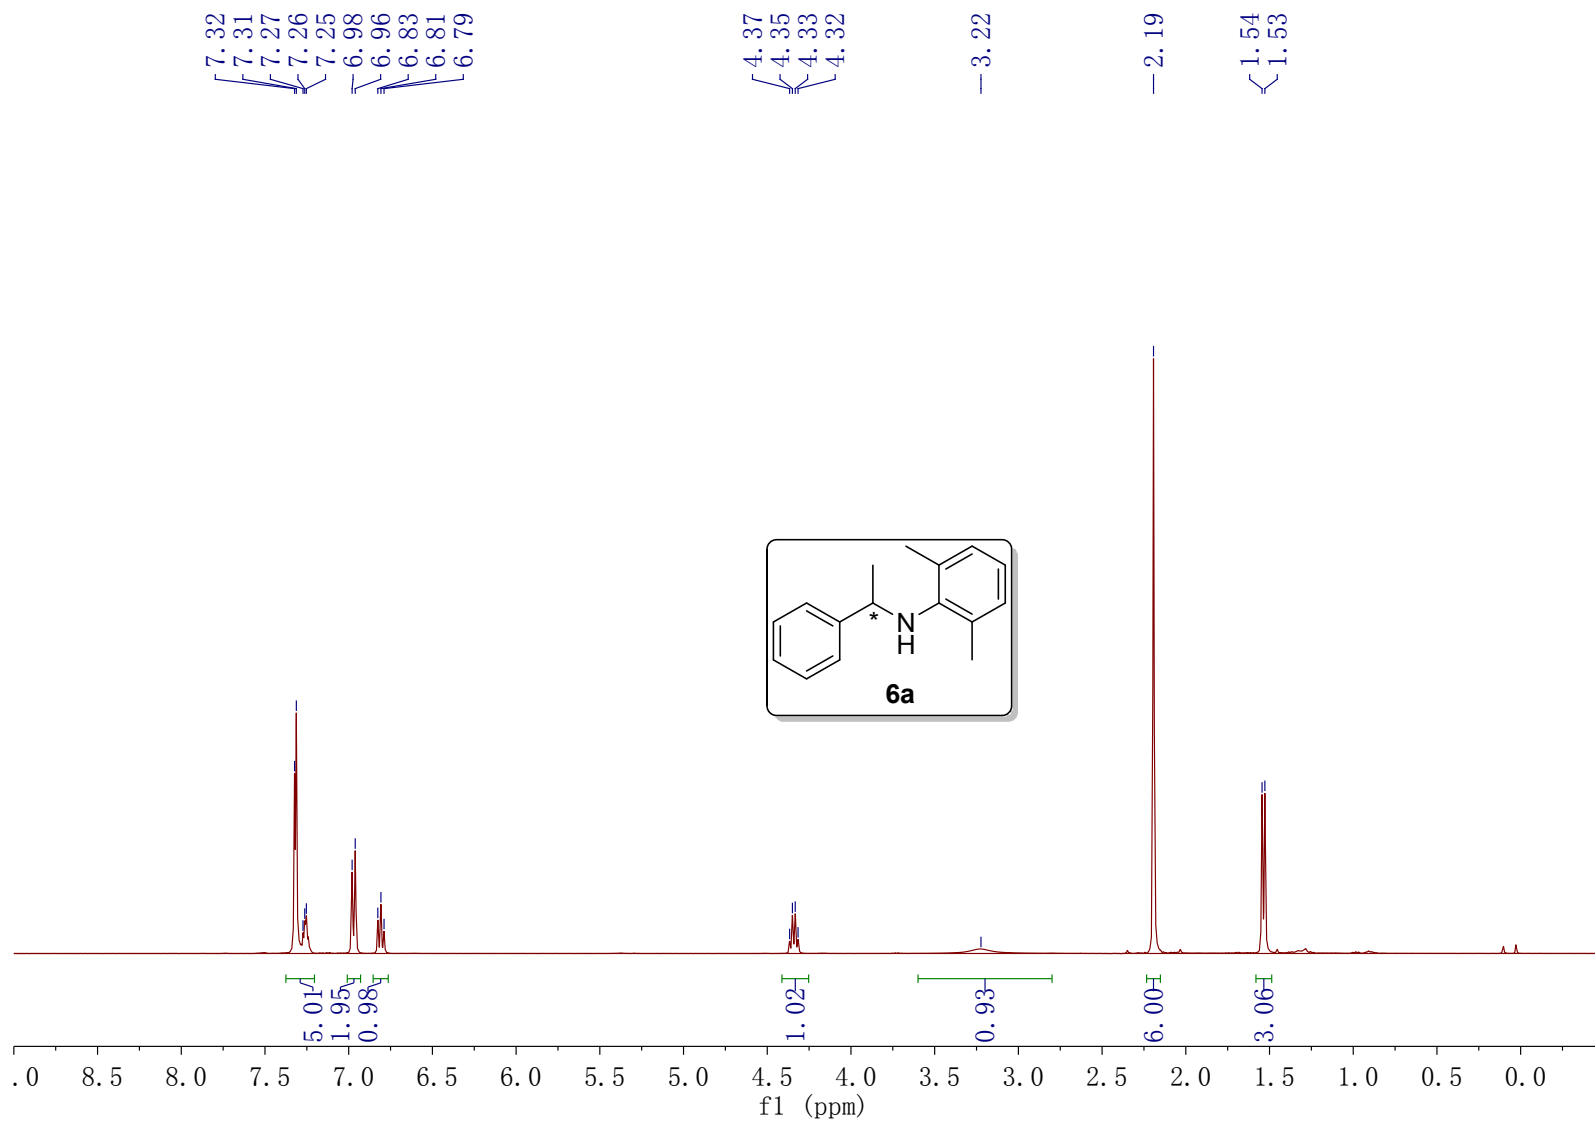

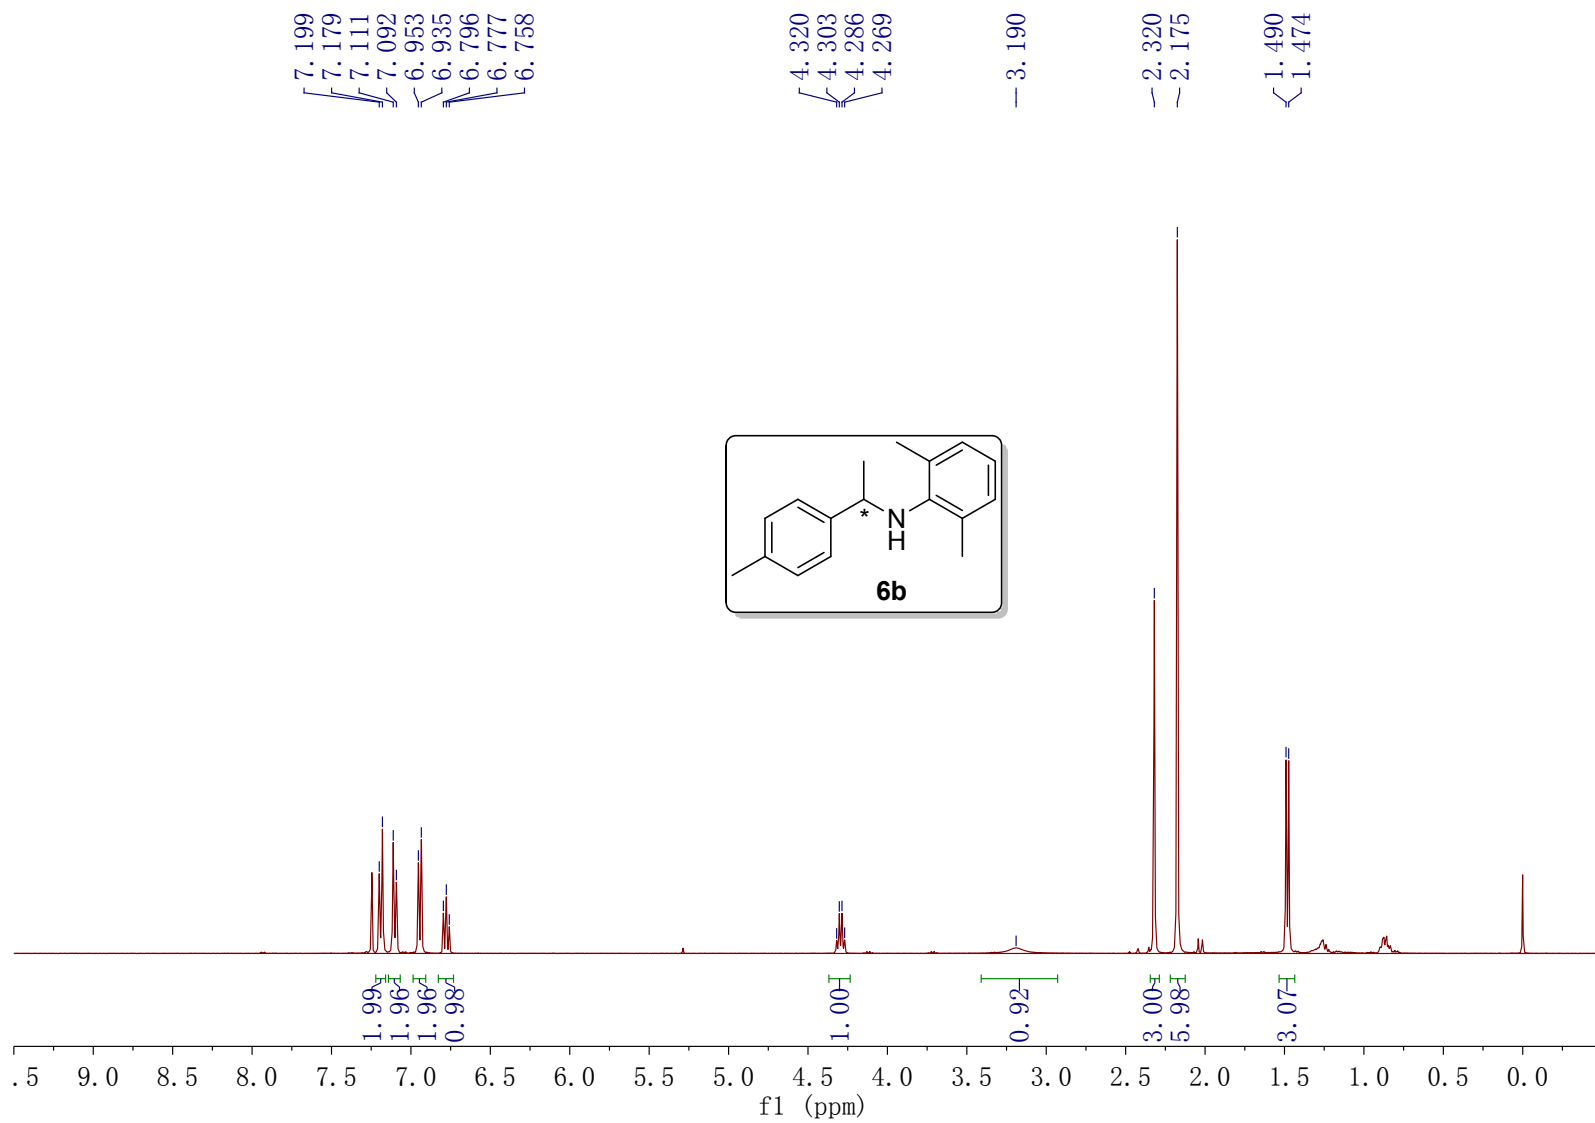

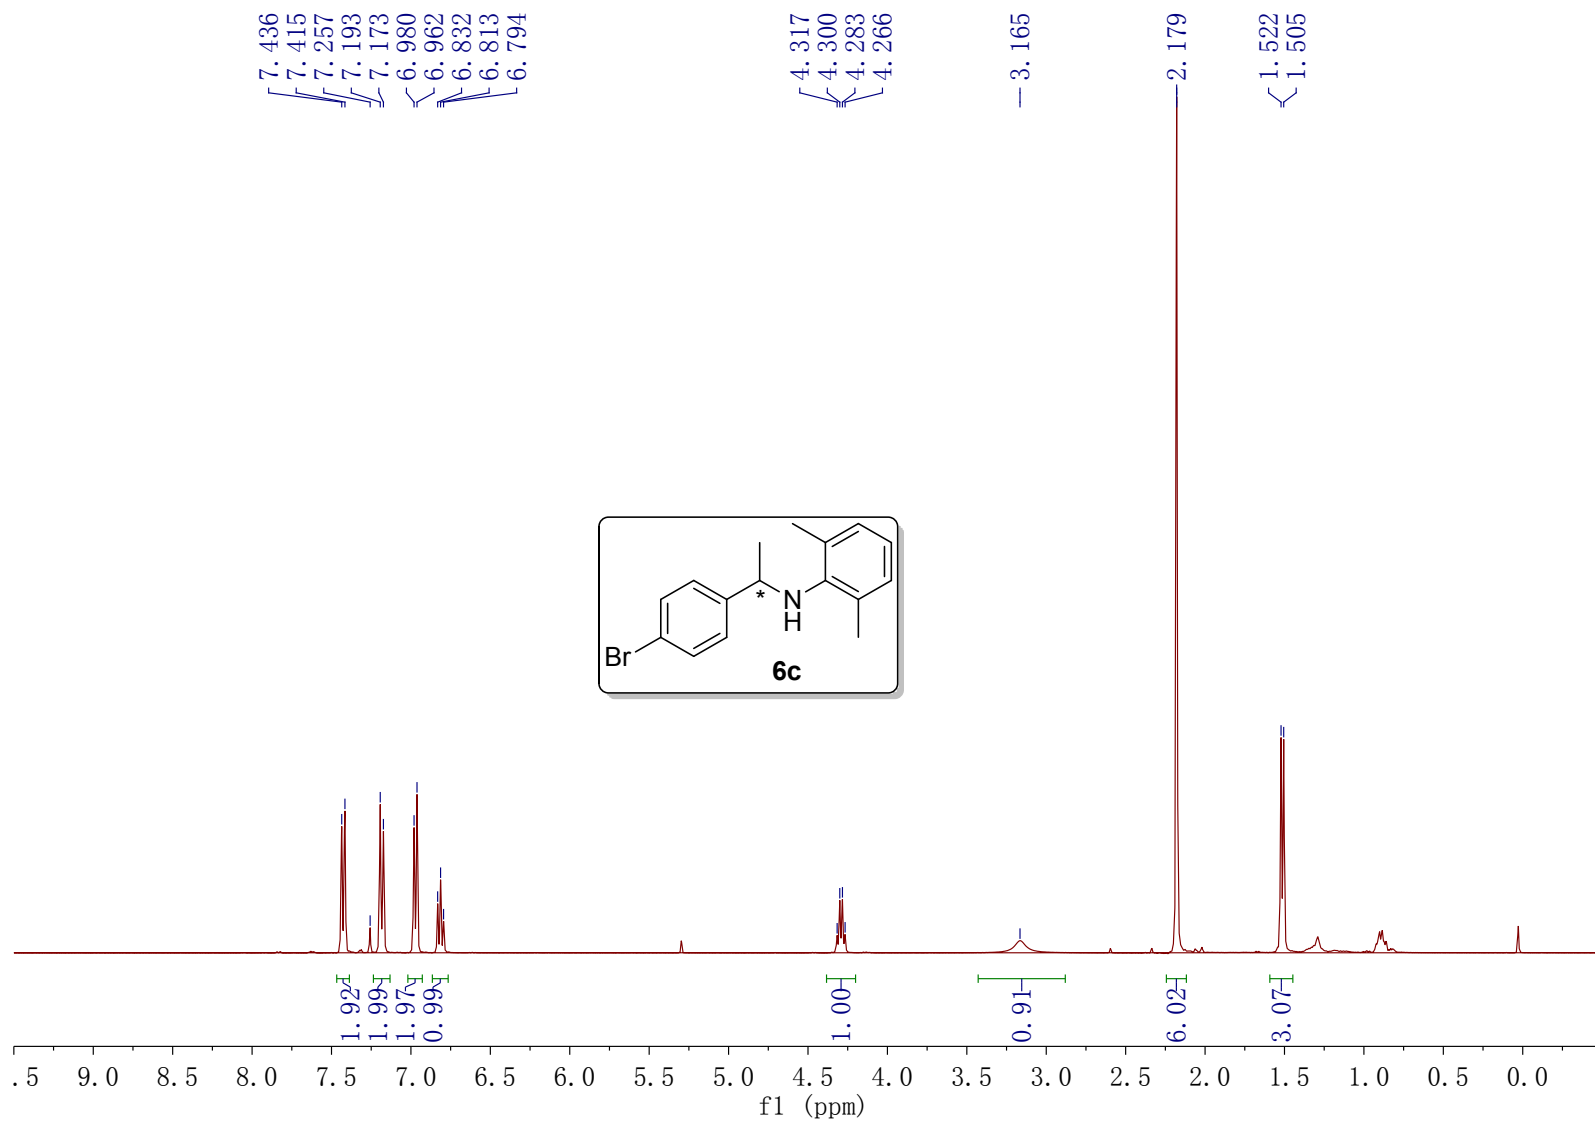

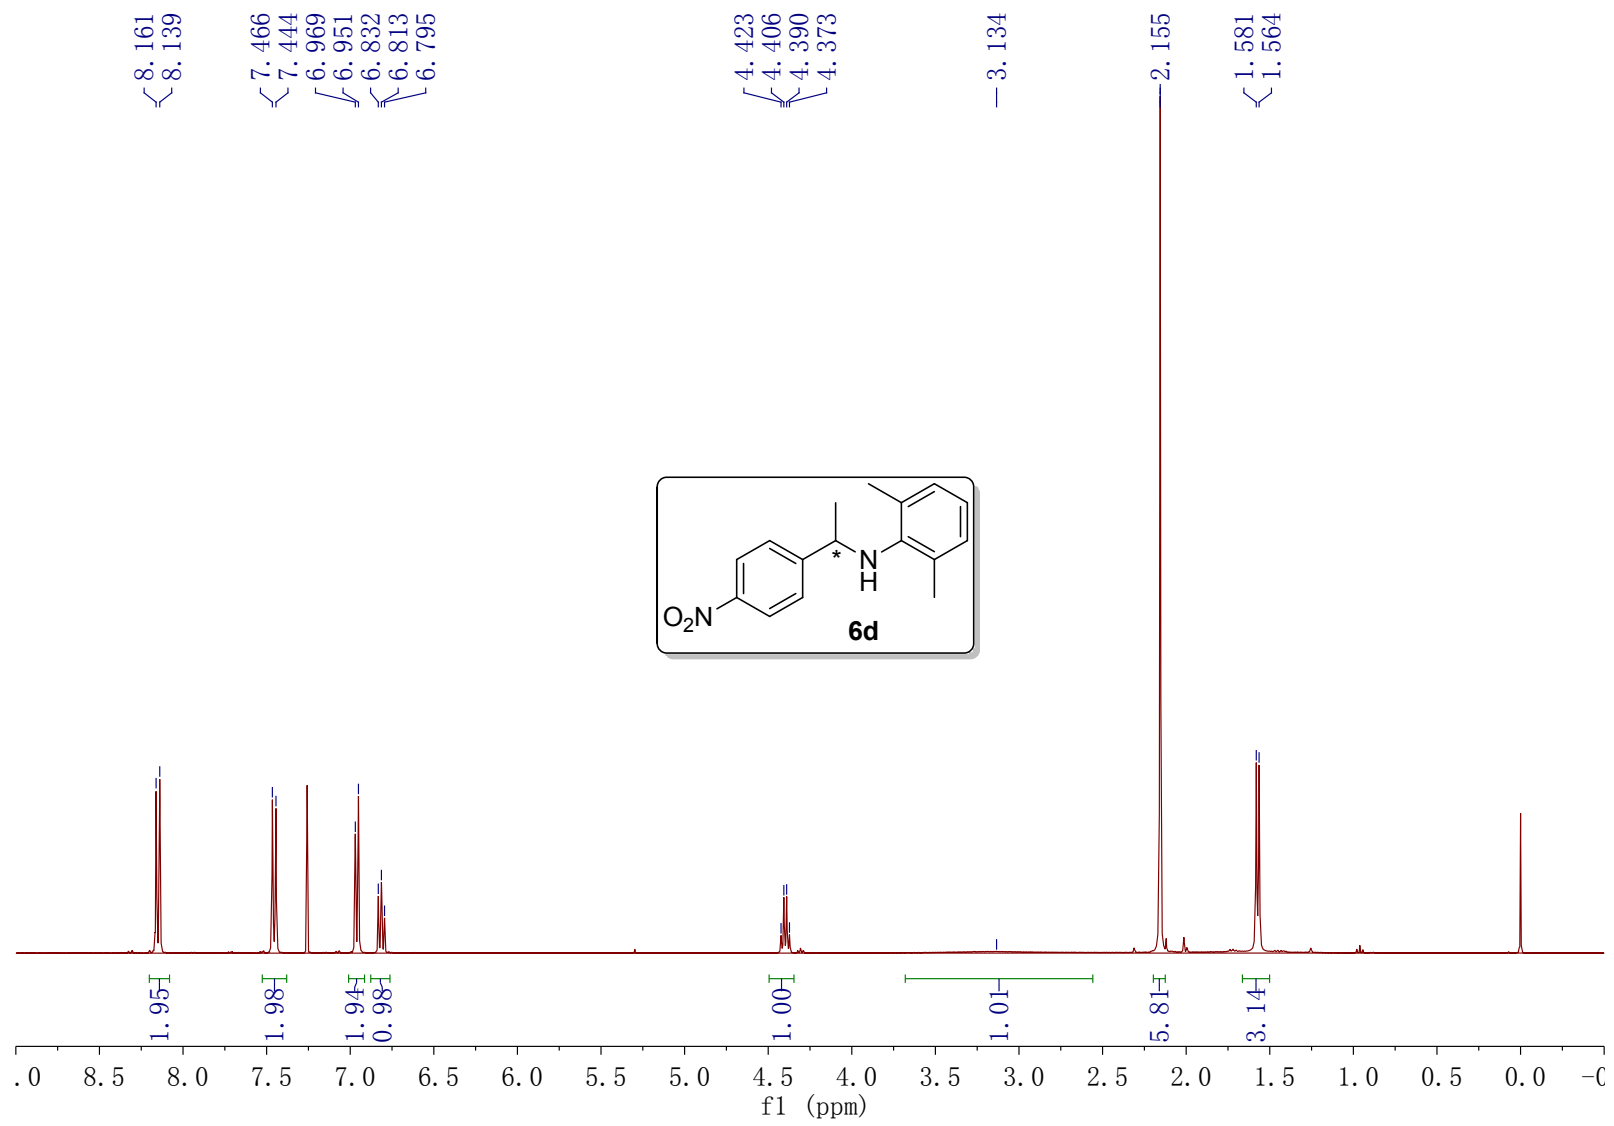

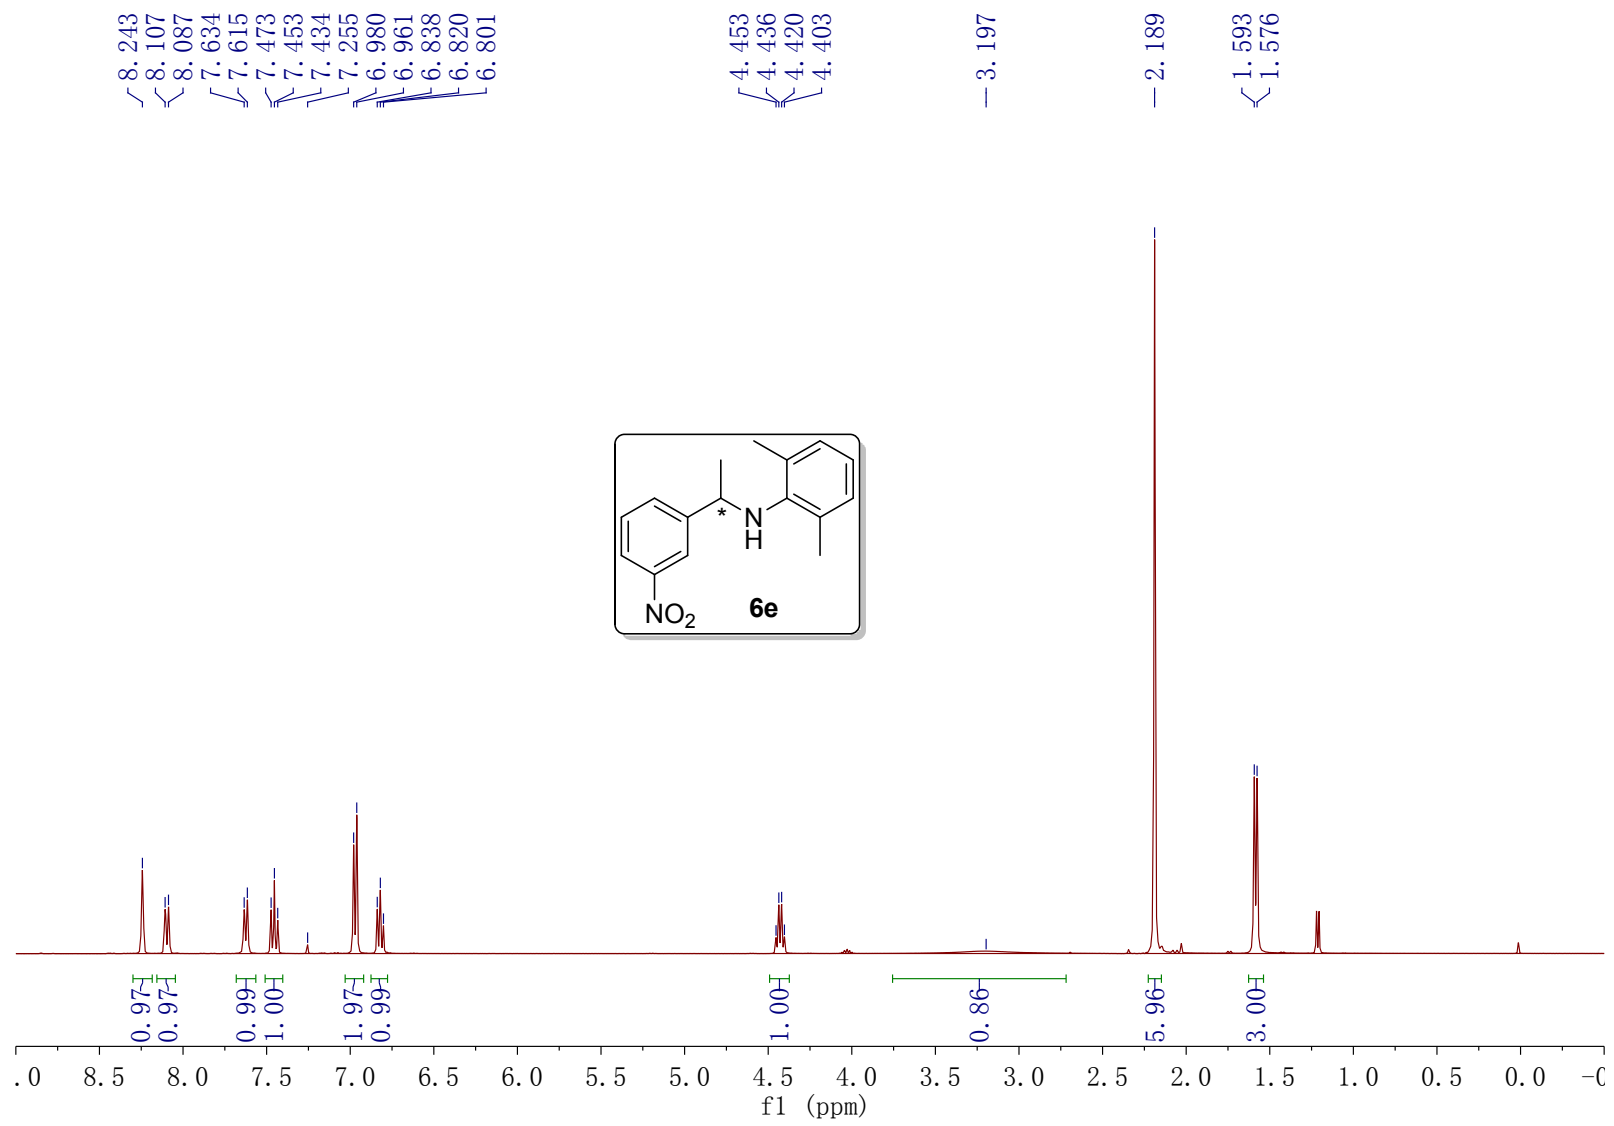

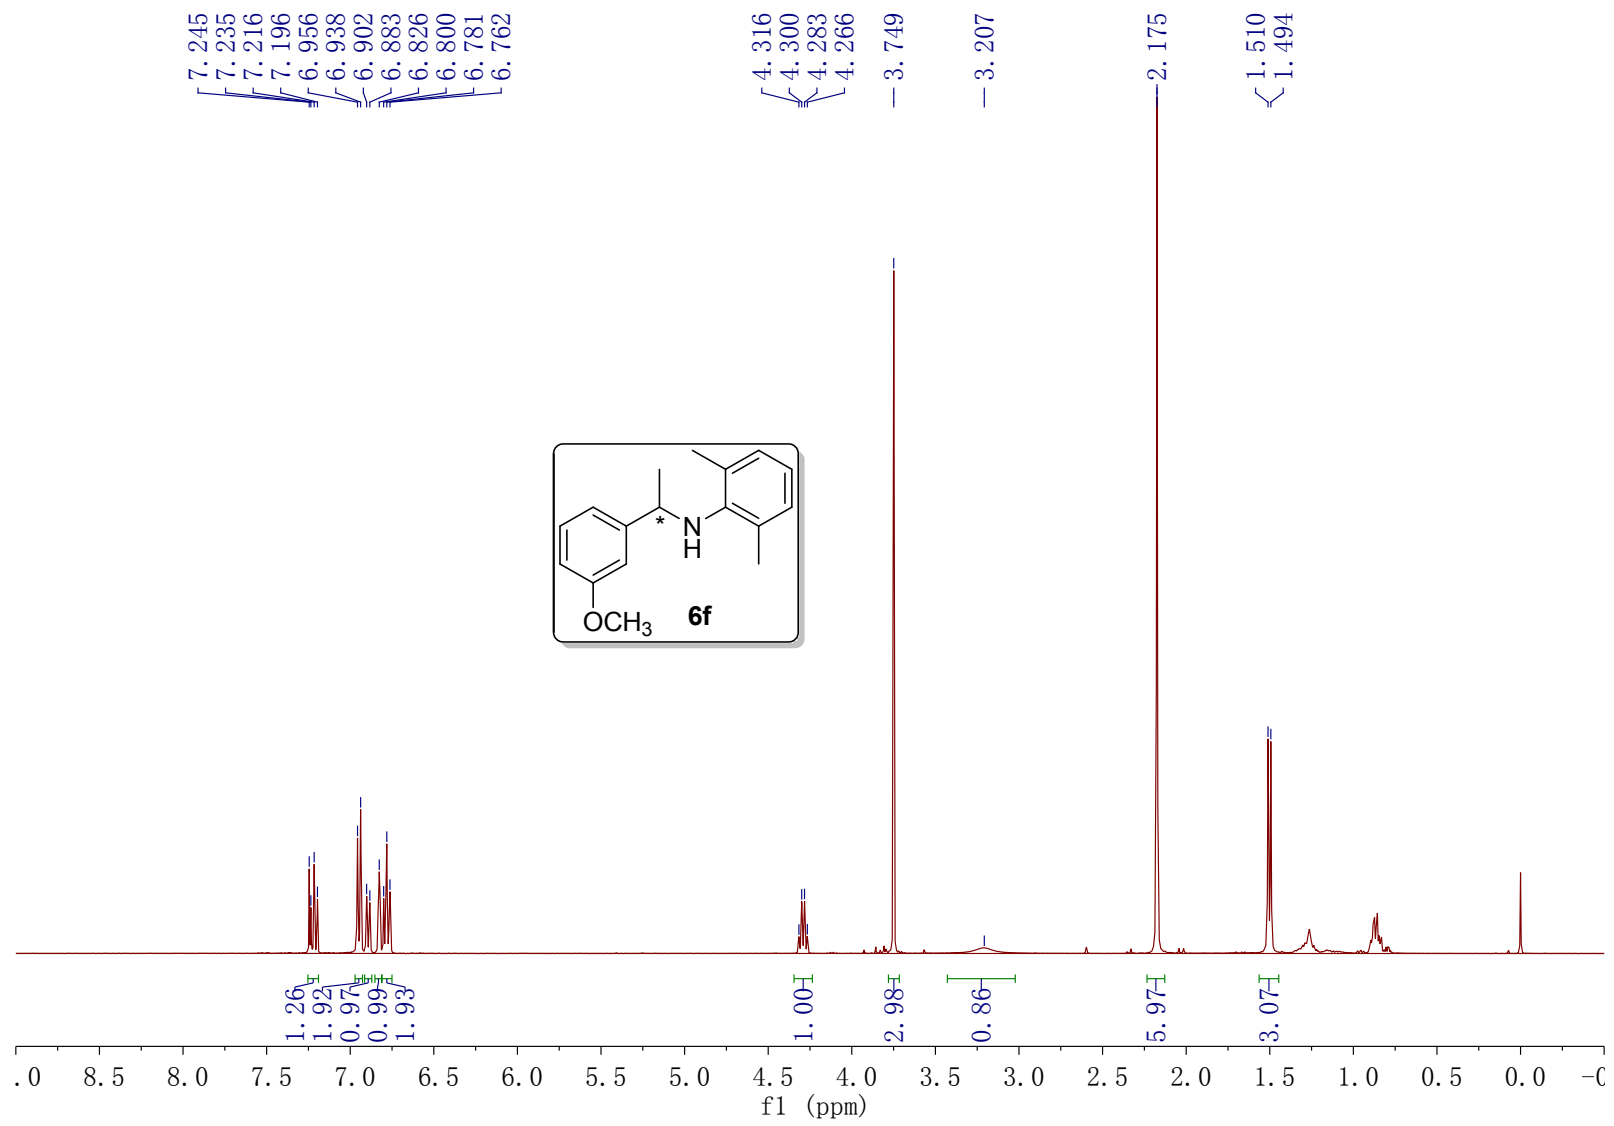

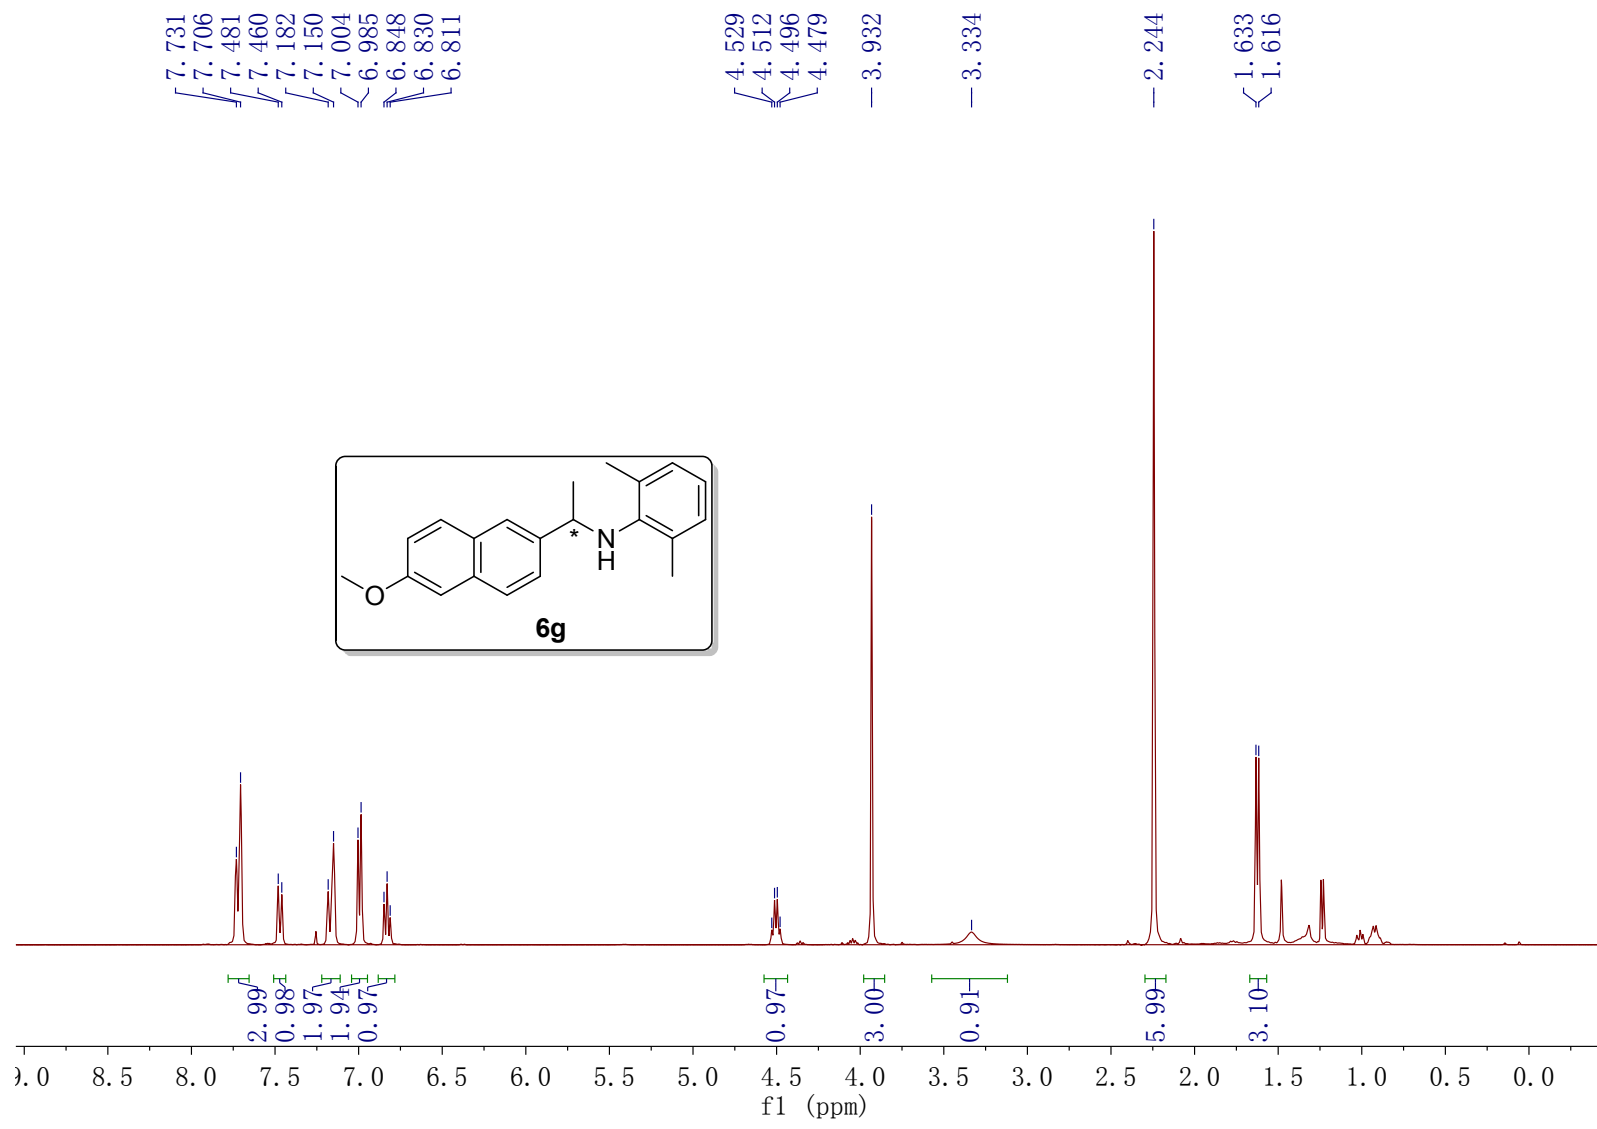



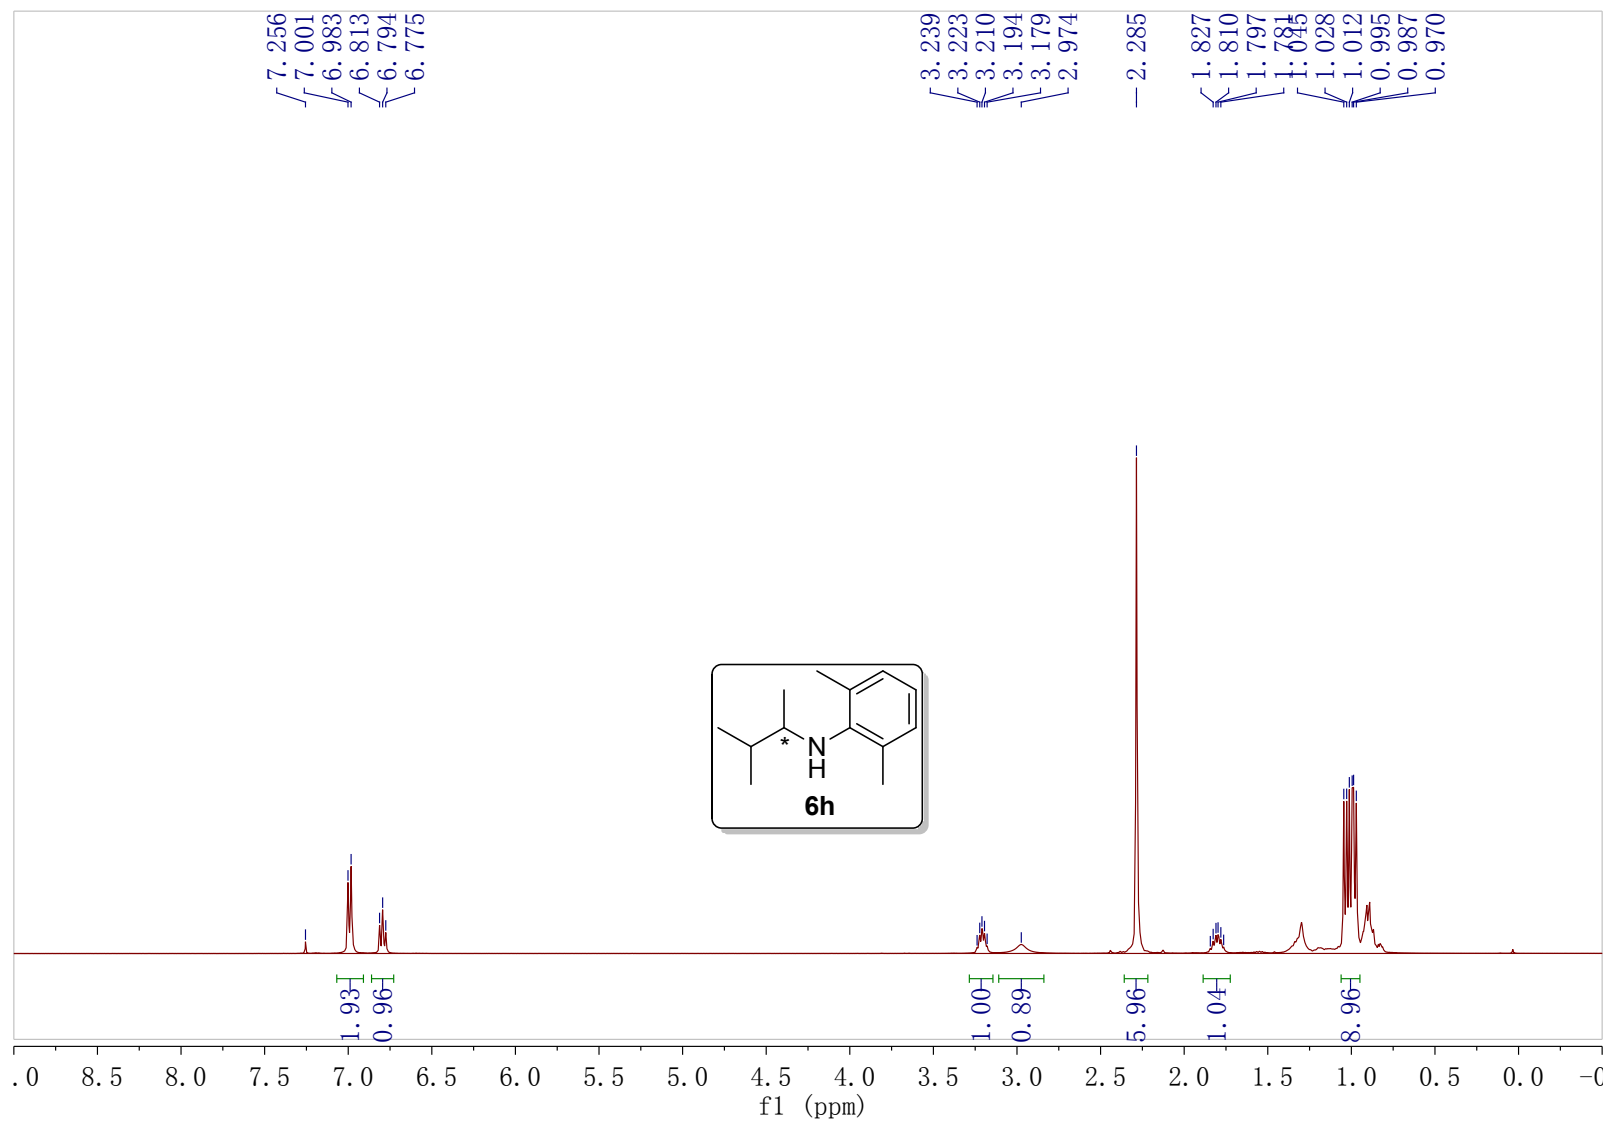

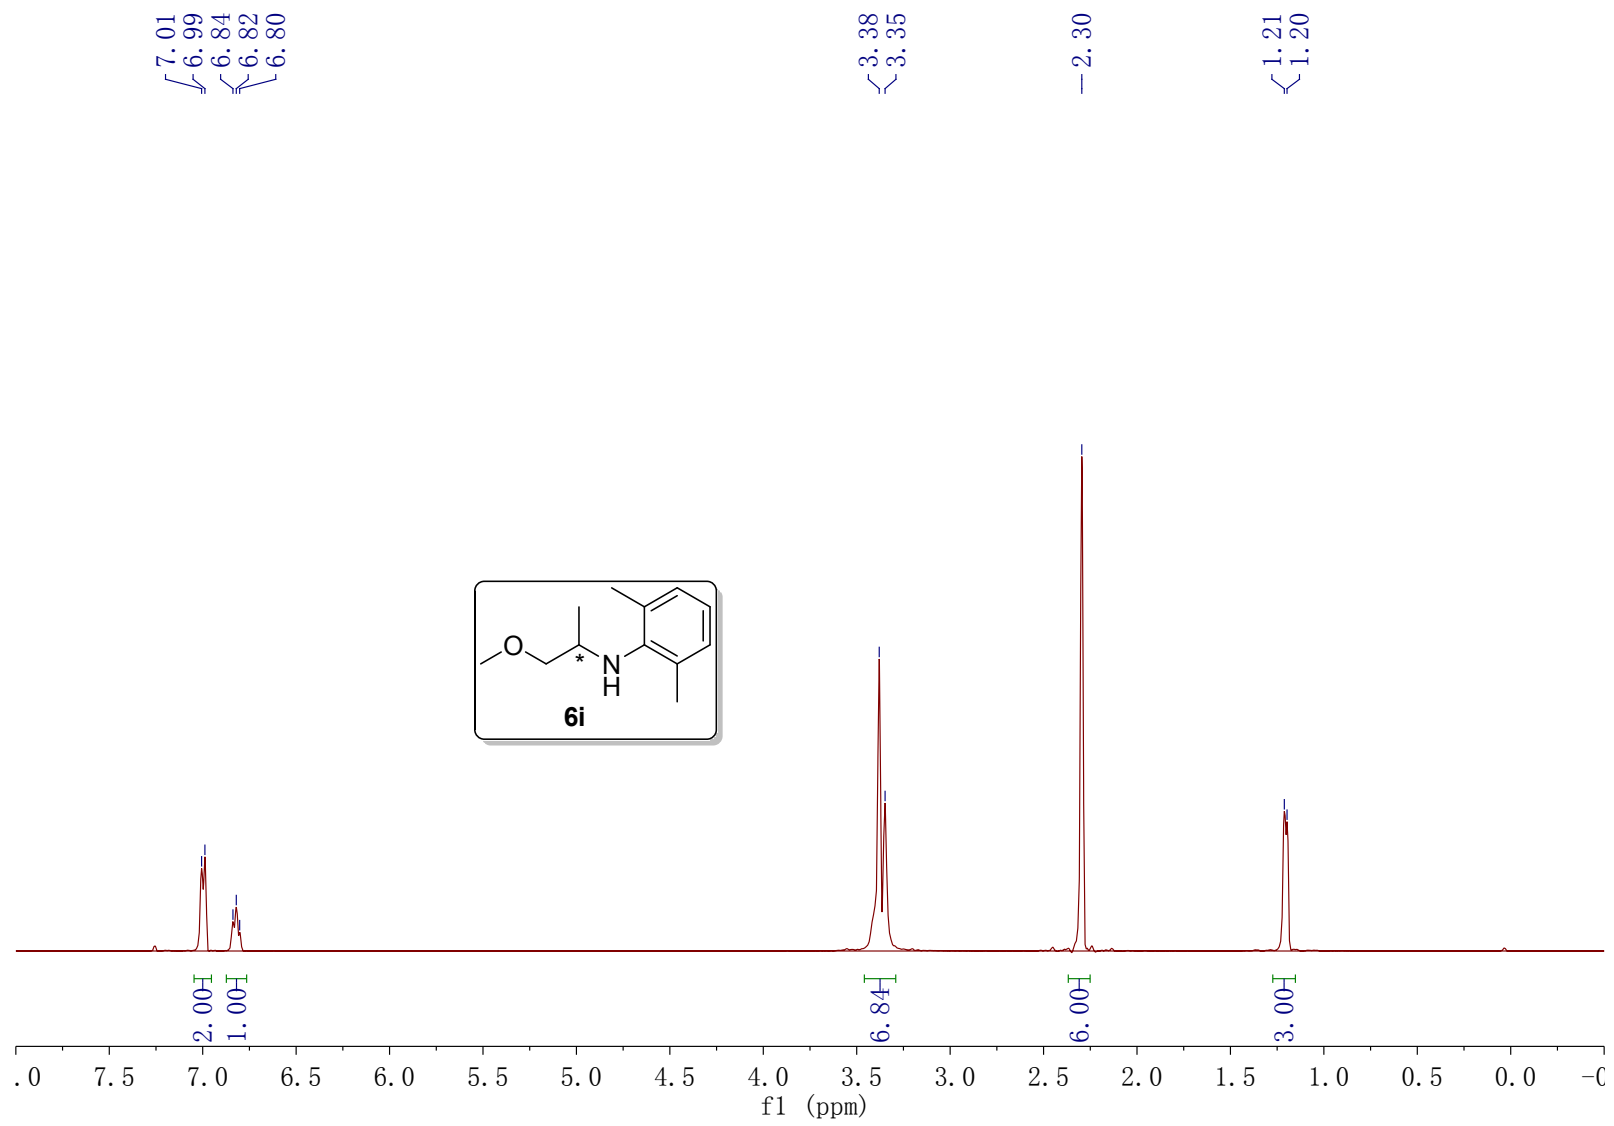

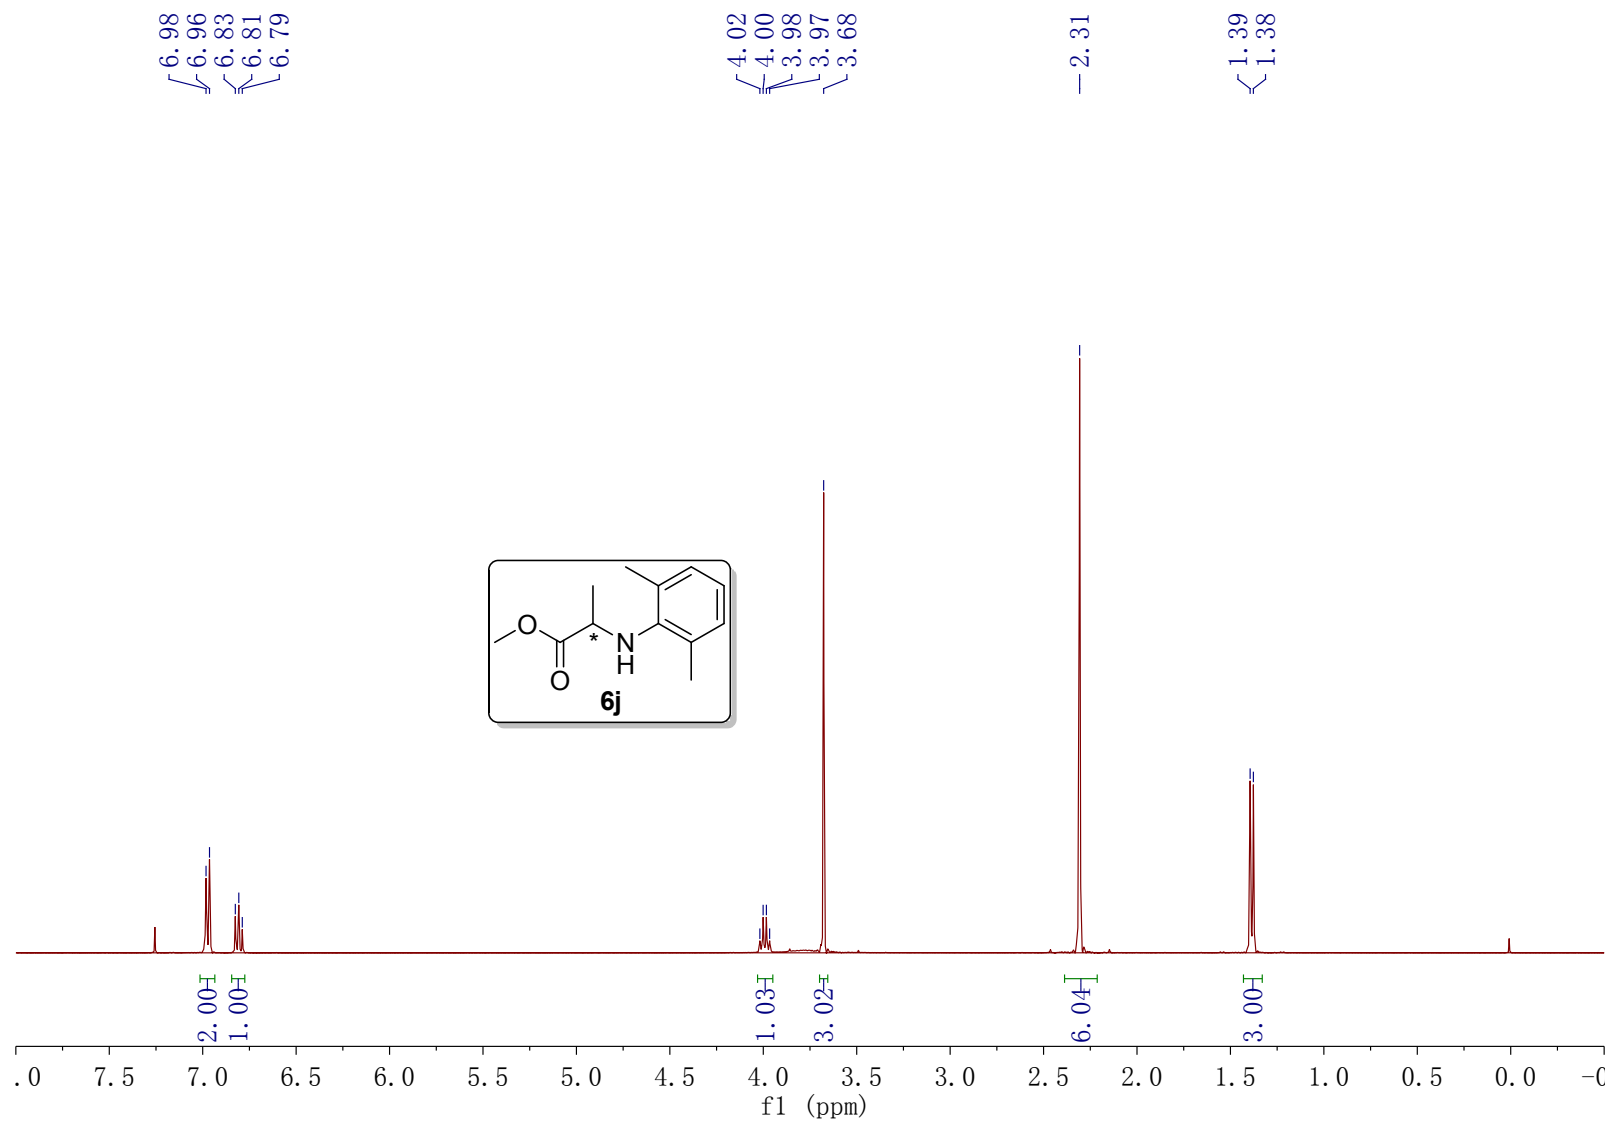

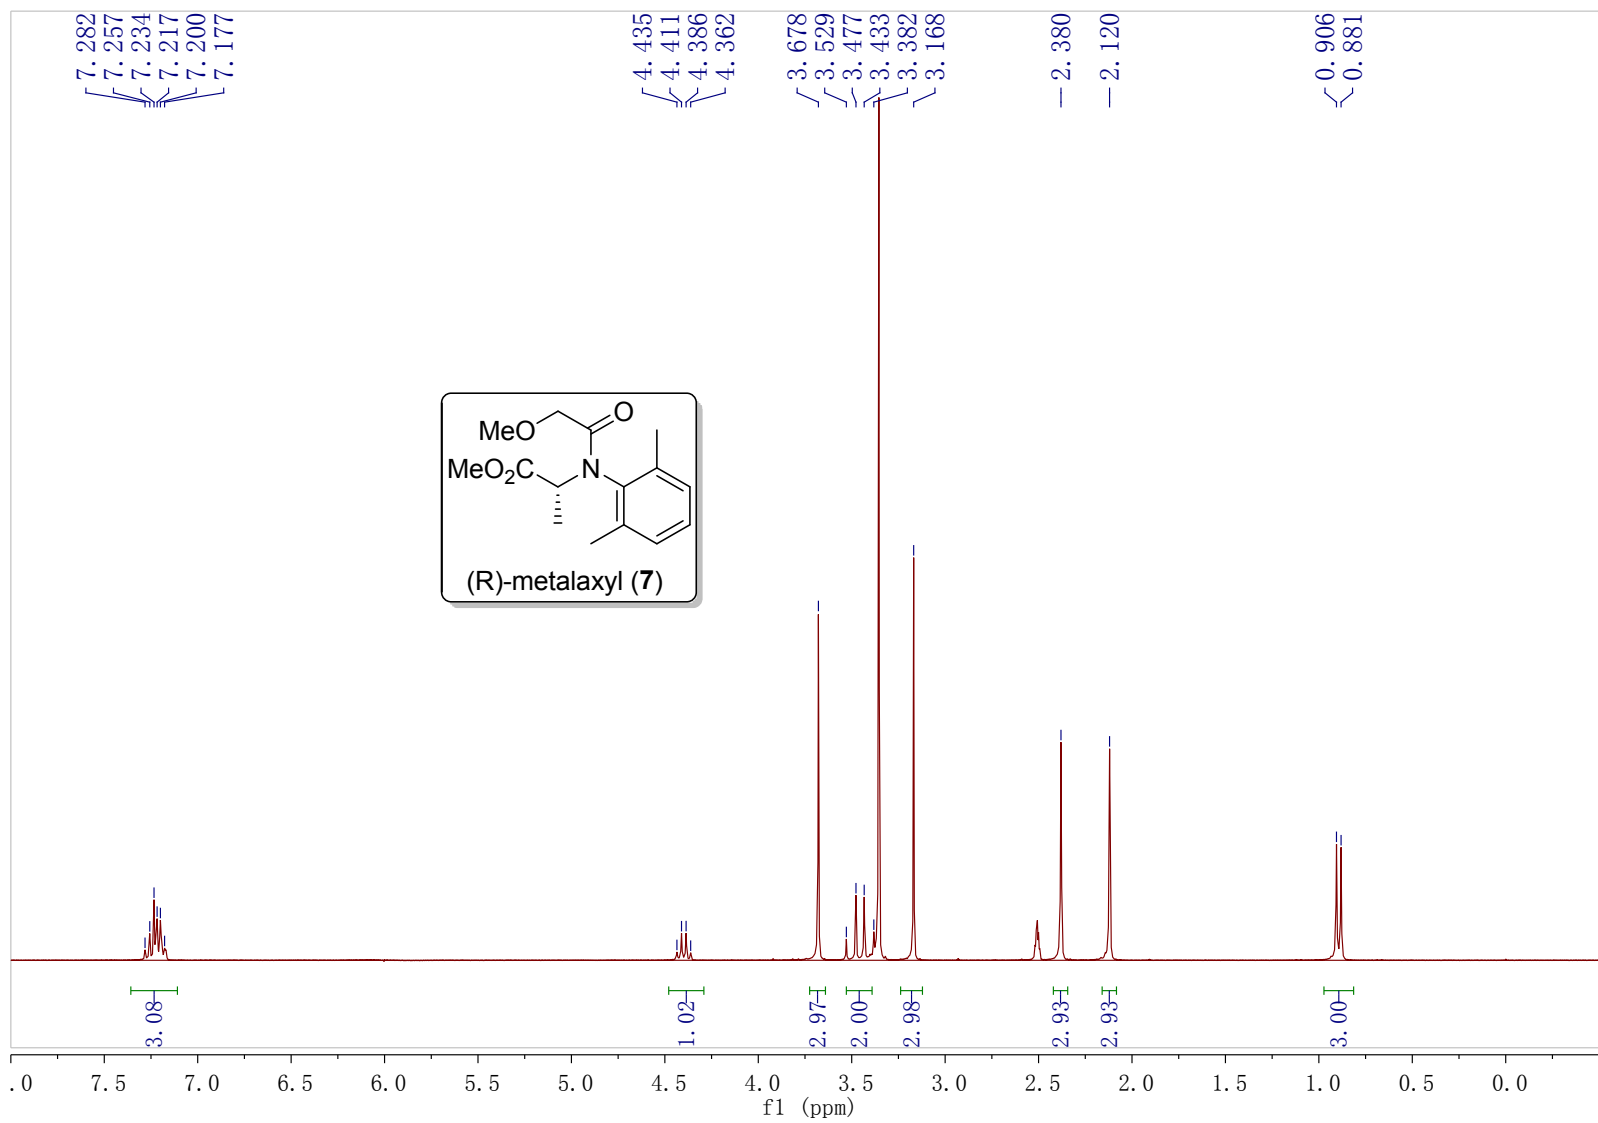

Supplement: c4ra16062b1.pdf [file c4ra16062b1.pdf]
